# Supplementary material for: The Power Decoder Simulator for the Evaluation of Pooled shRNA Screen Performance
Source: PubMed Central journal article supplement — J Biomol Screen. 2015 Sep;20(8):965–75. doi: 10.1177/1087057115576715 (PMC4543901; doi:10.1177/1087057115576715), 2015-09
Supplement: 10.1177_1087057115576715_Supp.pdf [file 10.1177_1087057115576715_Supp.pdf]

**Title:** The Power Decoder simulator for the evaluation of pooled shRNA screen performance

**Authors:** Jesse Stombaugh<sup>1</sup>, Abel Licon<sup>1</sup>, Žaklina Strezoska<sup>1</sup>, Joshua Stahl<sup>1</sup>, Sarah Bael Anderson<sup>1</sup>, Michael Banos<sup>1</sup>, Anja van Brabant Smith<sup>1</sup>, Amanda Birmingham<sup>1</sup>, Annaleen Vermeulen<sup>1</sup>

**Affiliation:** <sup>1</sup>Dharmacon, part of GE Healthcare, Lafayette, Colorado, United States of America

### **Supplemental Materials**

The open-source software described in the paper, as well as installation instructions and sample data sets, can be accessed on SourceForge.net at

<http://sourceforge.net/p/powerdecoder/code/HEAD/tree/trunk/>

## Supplemental Figures

**Figure S1.** Normalization of engineered screen data. MA plots of  $T_0$  raw (**A**) and a representative example of normalized (**B**) shRNA pooled screen data for Screen 500\_2x. shRNAs in the two 480-reagent subsets are shown in red and blue, while shRNAs in the main 4,675-reagent set are shown in black. As intended, normalization shifts the red and blue series back toward the bulk of the black series.

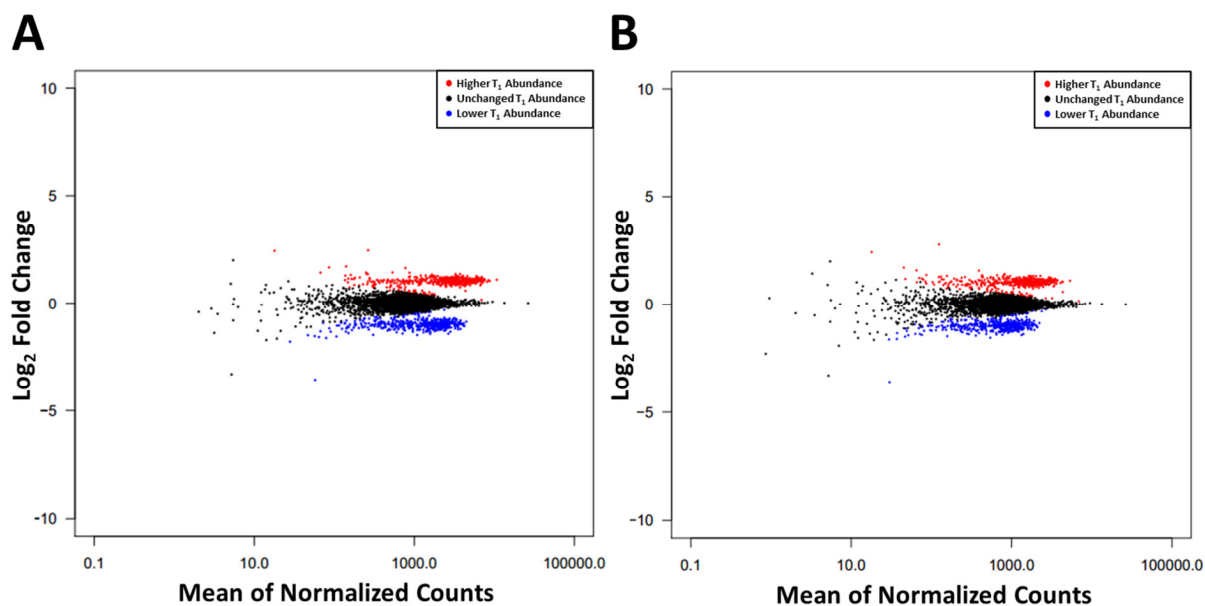

**Figure S2.** The mean-dispersion relationship of actual biological replicate counts for shRNAs in NGS data. Mean-dispersion relationship for representative examples of normalized experimental data from **(A)** Screen 100\_2x and **(B)** Screen 500\_2x. The dispersion parameter for each individual shRNA graphed as a function of mean number of counts for that shRNA. The red line is a regression line fitted through the points using the DESeq software, and can be used to model biological noise.

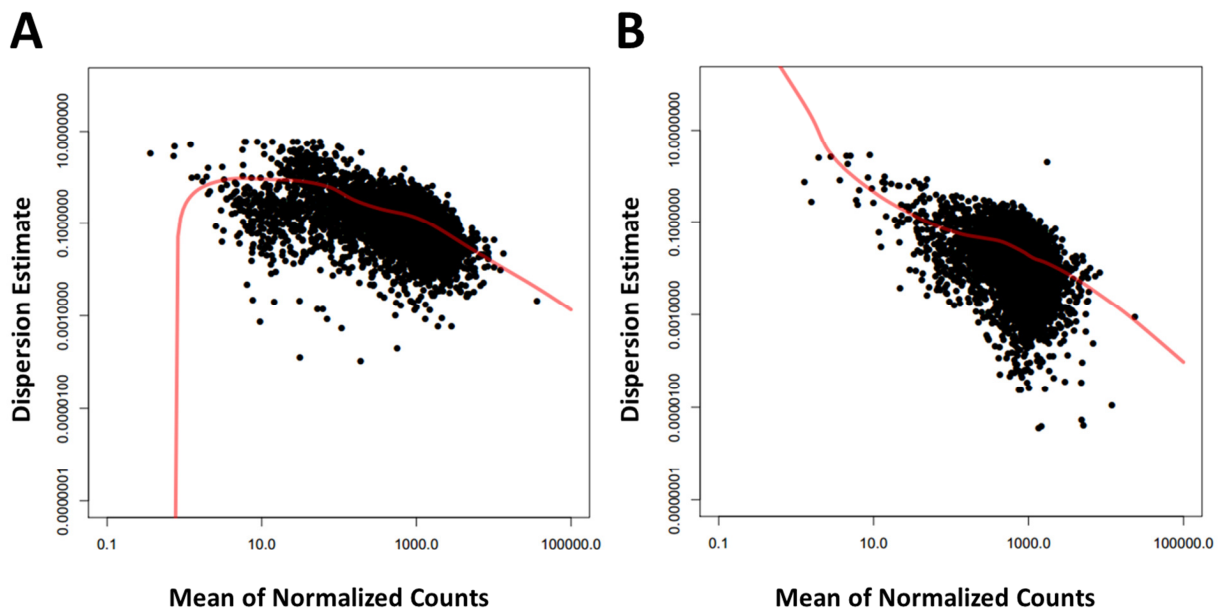

**Figure S3.** Simulated replicate noise compared to actual biological replicate noise. Comparison of replicate noise of representative examples of normalized actual (red) and simulated (blue) data for **(A)** Screen 100\_2x and **(B)** Screen 500\_2x. For each graph, the number of counts for each shRNA in biological replicate 1 is plotted as a function of the number of counts for the corresponding shRNA in biological replicate 2.

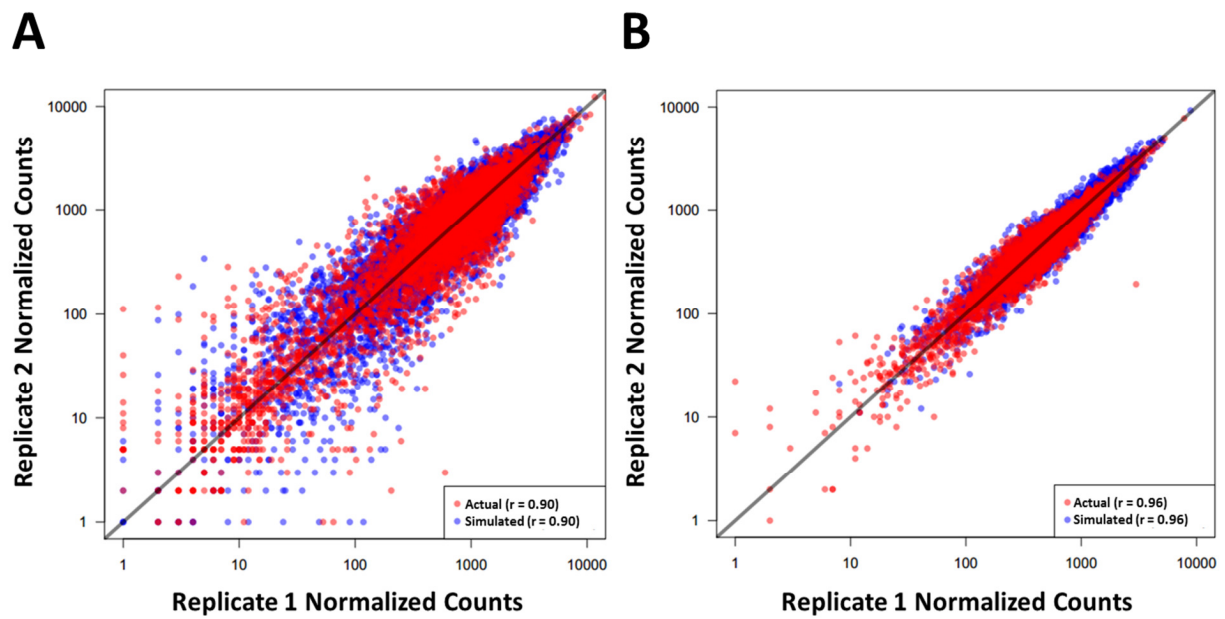

**Figure S4.** Power as a function of fold change. Box plots represent powers derived from DESeq analysis of 30 simulated NGS experiments per fold change.

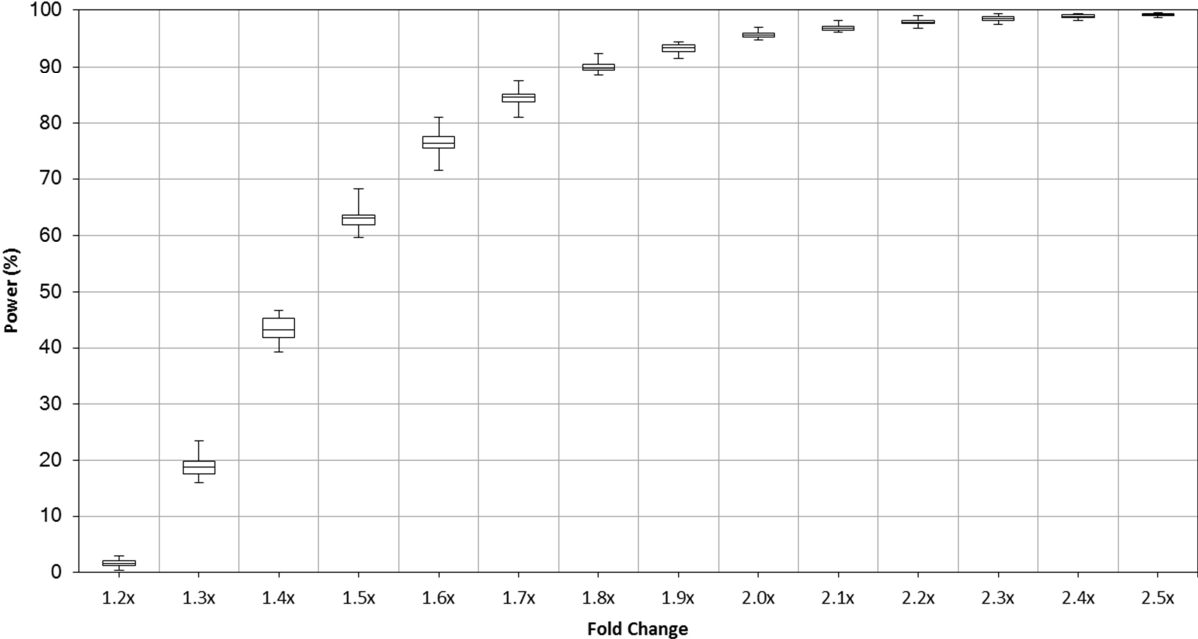

## Supplemental Tables

**Table S1.** shRNA library composition

| shRNA        | Target gene | Library  |
|--------------|-------------|----------|
| V2LHS_100148 | C8orf37     | Depleted |
| V2LHS_100410 | C1QTNF9     | Depleted |
| V2LHS_100888 | SCAF4       | Depleted |
| V2LHS_100893 | DOCK2       | Depleted |
| V2LHS_100917 | NCAPH       | Depleted |
| V2LHS_102235 | DAAM2       | Depleted |
| V2LHS_103078 | SLC22A10    | Depleted |
| V2LHS_103320 | SPRED3      | Depleted |
| V2LHS_103392 | ZNF28       | Depleted |
| V2LHS_103851 | C1orf174    | Depleted |
| V2LHS_110990 | KIAA0355    | Depleted |
| V2LHS_111028 | RNF213      | Depleted |
| V2LHS_112102 | ANXA1       | Depleted |
| V2LHS_113578 | ECM2        | Depleted |
| V2LHS_114001 | GAB1        | Depleted |
| V2LHS_114059 | Gas1        | Depleted |
| V2LHS_114341 | TOR1AIP1    | Depleted |
| V2LHS_114679 | ERLEC1      | Depleted |
| V2LHS_115181 | ZNF12       | Depleted |
| V2LHS_115236 | CDH9        | Depleted |
| V2LHS_115972 | C20orf111   | Depleted |
| V2LHS_116045 | PDZD11      | Depleted |
| V2LHS_116074 | FAM178B     | Depleted |
| V2LHS_116079 | MRPL37      | Depleted |
| V2LHS_116173 | YTHDC2      | Depleted |
| V2LHS_116230 | ARMCX5      | Depleted |
| V2LHS_116272 | C12orf43    | Depleted |
| V2LHS_116276 | RANBP17     | Depleted |
| V2LHS_116312 | TTC23       | Depleted |
| V2LHS_116564 | Der1        | Depleted |
| V2LHS_116727 | HMGNS       | Depleted |
| V2LHS_116785 | ZBP1        | Depleted |
| V2LHS_116857 | ITFG1       | Depleted |
| V2LHS_11686  | ZBTB24      | Depleted |
| V2LHS_116860 | ITFG1       | Depleted |
| V2LHS_116885 | STMN4       | Depleted |
| V2LHS_116956 | NDEL1       | Depleted |
| V2LHS_117018 | COL21A1     | Depleted |
| V2LHS_117148 | HNRNPC      | Depleted |
| V2LHS_117330 | CCM2        | Depleted |
| V2LHS_117345 | C19orf12    | Depleted |

|              |                |          |
|--------------|----------------|----------|
| V2LHS_117362 | TEX101         | Depleted |
| V2LHS_117463 | SH3BGRL2       | Depleted |
| V2LHS_117549 | GRWD1          | Depleted |
| V2LHS_117805 | MND1           | Depleted |
| V2LHS_117806 | MND1           | Depleted |
| V2LHS_117924 | C3orf20        | Depleted |
| V2LHS_117986 | ARMC4          | Depleted |
| V2LHS_118188 | FCRL3          | Depleted |
| V2LHS_118577 | PPP1R36        | Depleted |
| V2LHS_118685 | ANO4           | Depleted |
| V2LHS_118747 | LRRTM1         | Depleted |
| V2LHS_118832 | DYNC2H1        | Depleted |
| V2LHS_118952 | TTC39A         | Depleted |
| V2LHS_119919 | C7orf55        | Depleted |
| V2LHS_120049 | FAM151B        | Depleted |
| V2LHS_120197 | GRAMD2         | Depleted |
| V2LHS_120243 | SLX4           | Depleted |
| V2LHS_120329 | Fam116a        | Depleted |
| V2LHS_120381 | ZNF518B        | Depleted |
| V2LHS_120639 | OR6T1          | Depleted |
| V2LHS_120752 | OR8K3          | Depleted |
| V2LHS_120754 | OR8K1          | Depleted |
| V2LHS_121231 | SLC24A5        | Depleted |
| V2LHS_121359 | FAM169B        | Depleted |
| V2LHS_122202 | OR52B6         | Depleted |
| V2LHS_122666 | OR10A6         | Depleted |
| V2LHS_122672 | OR10A3         | Depleted |
| V2LHS_12377  | TERF2          | Depleted |
| V2LHS_12625  | CELF3          | Depleted |
| V2LHS_132266 | IFIT3          | Depleted |
| V2LHS_132344 | IMPG1          | Depleted |
| V2LHS_132444 | ACRV1          | Depleted |
| V2LHS_132459 | ACTG2          | Depleted |
| V2LHS_132494 | AIF1           | Depleted |
| V2LHS_133722 | KISS1          | Depleted |
| V2LHS_133867 | LAIR2          | Depleted |
| V2LHS_134135 | LY75           | Depleted |
| V2LHS_134162 | EPCAM          | Depleted |
| V2LHS_134204 | MAGEA4         | Depleted |
| V2LHS_134318 | CALHM2         | Depleted |
| V2LHS_134409 | YARS2          | Depleted |
| V2LHS_134763 | KBTBD4, PTPMT1 | Depleted |
| V2LHS_135018 | CHCHD8         | Depleted |
| V2LHS_135132 | MBIP           | Depleted |
| V2LHS_135214 | REEP2          | Depleted |
| V2LHS_135303 | ZNF644         | Depleted |
| V2LHS_135342 | WAC            | Depleted |

|              |           |          |
|--------------|-----------|----------|
| V2LHS_135406 | PRR16     | Depleted |
| V2LHS_135638 | PHACTR4   | Depleted |
| V2LHS_135885 | CENPO     | Depleted |
| V2LHS_136394 | NDNF      | Depleted |
| V2LHS_136441 | FAT4      | Depleted |
| V2LHS_136521 | AKIRIN1   | Depleted |
| V2LHS_136803 | RPF1      | Depleted |
| V2LHS_137171 | WDR96     | Depleted |
| V2LHS_137269 | PREX2     | Depleted |
| V2LHS_137297 | EFHC2     | Depleted |
| V2LHS_137431 | CXXC4     | Depleted |
| V2LHS_137433 | CXXC4     | Depleted |
| V2LHS_138291 | ELAVL3    | Depleted |
| V2LHS_138295 | ELAVL3    | Depleted |
| V2LHS_138318 | LDOC1L    | Depleted |
| V2LHS_138333 | ANKRD32   | Depleted |
| V2LHS_138337 | ANKRD32   | Depleted |
| V2LHS_138438 | C9orf64   | Depleted |
| V2LHS_138452 | CHCHD5    | Depleted |
| V2LHS_138552 | ZDHHC16   | Depleted |
| V2LHS_138710 | TMEM107   | Depleted |
| V2LHS_138743 | ACBD6     | Depleted |
| V2LHS_138877 | MKI67IP   | Depleted |
| V2LHS_138900 | C2orf40   | Depleted |
| V2LHS_138907 | CYSTM1    | Depleted |
| V2LHS_139128 | ATCAY     | Depleted |
| V2LHS_139144 | GFOD1     | Depleted |
| V2LHS_139443 | LRRC8A    | Depleted |
| V2LHS_140147 | Mrps9     | Depleted |
| V2LHS_140344 | DENND3    | Depleted |
| V2LHS_140834 | OR4D6     | Depleted |
| V2LHS_140915 | OR5B17    | Depleted |
| V2LHS_141498 | ZNF454    | Depleted |
| V2LHS_141508 | FAM105B   | Depleted |
| V2LHS_141572 | DOPEY1    | Depleted |
| V2LHS_141650 | LINC00174 | Depleted |
| V2LHS_141910 | OR6C75    | Depleted |
| V2LHS_141914 | OR6C75    | Depleted |
| V2LHS_142895 | CPLX4     | Depleted |
| V2LHS_152886 | ITSN1     | Depleted |
| V2LHS_153297 | SNTA1     | Depleted |
| V2LHS_153369 | SP100     | Depleted |
| V2LHS_155828 | ARMC1     | Depleted |
| V2LHS_157425 | RABL6     | Depleted |
| V2LHS_15796  | TMEM178A  | Depleted |
| V2LHS_160116 | ZNF502    | Depleted |
| V2LHS_170147 | PMCH      | Depleted |



|              |                      |          |
|--------------|----------------------|----------|
| V2LHS_170378 | PRELP                | Depleted |
| V2LHS_171430 | TNNC1                | Depleted |
| V2LHS_172136 | ZNF7                 | Depleted |
| V2LHS_172231 | ZNF135               | Depleted |
| V2LHS_172280 | ZNF165               | Depleted |
| V2LHS_172927 | TSC22D3              | Depleted |
| V2LHS_173673 | PNRC2                | Depleted |
| V2LHS_177692 | C9orf100             | Depleted |
| V2LHS_177695 | C9orf100             | Depleted |
| V2LHS_178609 | MKX                  | Depleted |
| V2LHS_180116 | C16orf87             | Depleted |
| V2LHS_180364 | MTERFD2              | Depleted |
| V2LHS_181969 | TMEM17               | Depleted |
| V2LHS_185197 | MURC                 | Depleted |
| V2LHS_185938 | COL28A1              | Depleted |
| V2LHS_190526 | TRO                  | Depleted |
| V2LHS_19380  | 6330527O06Rik, LAMP5 | Depleted |
| V2LHS_193882 | KRT18                | Depleted |
| V2LHS_19391  | DNAJC19, RGD1560220  | Depleted |
| V2LHS_19461  | CMTM3                | Depleted |
| V2LHS_195323 | HNRNPU               | Depleted |
| V2LHS_195333 | SLMAP                | Depleted |
| V2LHS_196025 | THSD4                | Depleted |
| V2LHS_196197 | Slmap                | Depleted |
| V2LHS_197244 | RBMXL2               | Depleted |
| V2LHS_197247 | GPN1                 | Depleted |
| V2LHS_198295 | DCAF7                | Depleted |
| V2LHS_198410 | DKK2                 | Depleted |
| V2LHS_198453 | RCAN2                | Depleted |
| V2LHS_199337 | CLEC10A              | Depleted |
| V2LHS_199800 | EVI2B                | Depleted |
| V2LHS_199940 | WDHD1                | Depleted |
| V2LHS_201149 | WDFY1                | Depleted |
| V2LHS_201552 | DIDO1                | Depleted |
| V2LHS_201722 | POLR3F               | Depleted |
| V2LHS_201909 | SPAG5                | Depleted |
| V2LHS_202347 | MCRS1                | Depleted |
| V2LHS_202399 | VHL                  | Depleted |
| V2LHS_203007 | SRSF6                | Depleted |
| V2LHS_203386 | POLR3F               | Depleted |
| V2LHS_204722 | UTS2D                | Depleted |
| V2LHS_204971 | PAQR3                | Depleted |
| V2LHS_206052 | FCHO2                | Depleted |
| V2LHS_206658 | SMOC1                | Depleted |
| V2LHS_206773 | CLN5                 | Depleted |
| V2LHS_207437 | ZNF791, ZNF833P      | Depleted |
| V2LHS_209070 | C14orf133            | Depleted |

|              |              |          |
|--------------|--------------|----------|
| V2LHS_210823 | TM4SF18      | Depleted |
| V2LHS_210829 | THADA        | Depleted |
| V2LHS_211707 | TGOLN2       | Depleted |
| V2LHS_212240 | WDR85        | Depleted |
| V2LHS_212553 | LRRN1        | Depleted |
| V2LHS_212619 | OR10AD1      | Depleted |
| V2LHS_212700 | CRYGC        | Depleted |
| V2LHS_213415 | PRX          | Depleted |
| V2LHS_213767 | NRXN3        | Depleted |
| V2LHS_213846 | CCDC171      | Depleted |
| V2LHS_213985 | Bet1         | Depleted |
| V2LHS_214436 | CLEC4E       | Depleted |
| V2LHS_214562 | ZNF667       | Depleted |
| V2LHS_215259 | CACYBP       | Depleted |
| V2LHS_215479 | FAM135A      | Depleted |
| V2LHS_215860 | C1QL2        | Depleted |
| V2LHS_216037 | FAM134C      | Depleted |
| V2LHS_216181 | ANGPTL5      | Depleted |
| V2LHS_216231 | MOBP         | Depleted |
| V2LHS_216308 | SUMF1        | Depleted |
| V2LHS_216590 | SPATA17      | Depleted |
| V2LHS_216892 | RASSF8       | Depleted |
| V2LHS_219517 | ZNHIT6       | Depleted |
| V2LHS_220860 | ASAP3        | Depleted |
| V2LHS_221178 | TEX10        | Depleted |
| V2LHS_221491 | C5orf22      | Depleted |
| V2LHS_221539 | TSSC1        | Depleted |
| V2LHS_221855 | TATDN3       | Depleted |
| V2LHS_224241 | DCDC2        | Depleted |
| V2LHS_224376 | ARL5B        | Depleted |
| V2LHS_224493 | C4BPB        | Depleted |
| V2LHS_224557 | TMEM200A     | Depleted |
| V2LHS_224759 | HSPA12A      | Depleted |
| V2LHS_224796 | OR5AK2       | Depleted |
| V2LHS_225675 | POC1B        | Depleted |
| V2LHS_225736 | OR8K3        | Depleted |
| V2LHS_226073 | FMR1         | Depleted |
| V2LHS_226100 | SGSM3        | Depleted |
| V2LHS_226260 | THAP2        | Depleted |
| V2LHS_226894 | CD59         | Depleted |
| V2LHS_226992 | YTHDF2       | Depleted |
| V2LHS_227248 | GTF2F1       | Depleted |
| V2LHS_227701 | RIBC2        | Depleted |
| V2LHS_228351 | NOC2L        | Depleted |
| V2LHS_228365 | OR5L1        | Depleted |
| V2LHS_228454 | CSTF3        | Depleted |
| V2LHS_229150 | SBDS, SBDSP1 | Depleted |

|              |                                  |          |
|--------------|----------------------------------|----------|
| V2LHS_229542 | UTP11L                           | Depleted |
| V2LHS_229557 | ZFP30                            | Depleted |
| V2LHS_229681 | CPEB3                            | Depleted |
| V2LHS_230045 | SCCPDH                           | Depleted |
| V2LHS_230263 | LOC399491, NPIP, PDXDC2P, PKD1P1 | Depleted |
| V2LHS_230398 | HRG                              | Depleted |
| V2LHS_230429 | ATXN1                            | Depleted |
| V2LHS_230442 | MTSS1                            | Depleted |
| V2LHS_230802 | LUC7L2                           | Depleted |
| V2LHS_230850 | ZNF642                           | Depleted |
| V2LHS_230865 | CLDN10                           | Depleted |
| V2LHS_230955 | RPH3AL                           | Depleted |
| V2LHS_231536 | WDR17                            | Depleted |
| V2LHS_231559 | ATXN1                            | Depleted |
| V2LHS_232289 | KIAA0528                         | Depleted |
| V2LHS_232330 | RPS17, RPS17L                    | Depleted |
| V2LHS_232363 | KIAA1107                         | Depleted |
| V2LHS_232374 | ZNF300                           | Depleted |
| V2LHS_232735 | AP1G1                            | Depleted |
| V2LHS_232739 | C7orf25                          | Depleted |
| V2LHS_232862 | LOC441155, ZC3H11A               | Depleted |
| V2LHS_233061 | Olf1238, Olf703, OR8D1           | Depleted |
| V2LHS_233065 | LOC285359, PDCL3                 | Depleted |
| V2LHS_233076 | SETBP1                           | Depleted |
| V2LHS_233334 | AHNAK                            | Depleted |
| V2LHS_233529 | GGCT                             | Depleted |
| V2LHS_233747 | TMBIM4                           | Depleted |
| V2LHS_234336 | CRELD2                           | Depleted |
| V2LHS_234627 | WDR26                            | Depleted |
| V2LHS_234700 | CEP97                            | Depleted |
| V2LHS_234706 | CRELD2                           | Depleted |
| V2LHS_234794 | CRELD2                           | Depleted |
| V2LHS_234860 | PDGFD                            | Depleted |
| V2LHS_235018 | KIAA0226L                        | Depleted |
| V2LHS_23504  | FRYL                             | Depleted |
| V2LHS_235173 | Morc4                            | Depleted |
| V2LHS_235221 | ZNF614                           | Depleted |
| V2LHS_235362 | GPATCH8                          | Depleted |
| V2LHS_235790 | FAM213A                          | Depleted |
| V2LHS_236535 | KLRC3                            | Depleted |
| V2LHS_237358 | ITGA8                            | Depleted |
| V2LHS_238224 | PRRG2                            | Depleted |
| V2LHS_238416 | CRLF3                            | Depleted |
| V2LHS_240445 | ZNF627                           | Depleted |
| V2LHS_27555  | NUP155                           | Depleted |
| V2LHS_32622  | RGS2                             | Depleted |
| V2LHS_33776  | WNT2B                            | Depleted |

|             |                    |          |
|-------------|--------------------|----------|
| V2LHS_34433 | MAGEA10            | Depleted |
| V2LHS_35460 | SLIT2              | Depleted |
| V2LHS_35746 | TMEM159            | Depleted |
| V2LHS_36333 | PLXNB3             | Depleted |
| V2LHS_36594 | REPS2              | Depleted |
| V2LHS_37001 | CXorf1             | Depleted |
| V2LHS_37208 | C7orf41            | Depleted |
| V2LHS_37368 | ZNF551             | Depleted |
| V2LHS_37558 | CCDC110            | Depleted |
| V2LHS_37563 | CCDC110            | Depleted |
| V2LHS_37597 | CLEC12A            | Depleted |
| V2LHS_37877 | CXorf58            | Depleted |
| V2LHS_38000 | Sema3d             | Depleted |
| V2LHS_38209 | MS4A13             | Depleted |
| V2LHS_3821  | CNNM4              | Depleted |
| V2LHS_38221 | Nxph1              | Depleted |
| V2LHS_38530 | BEND6              | Depleted |
| V2LHS_38677 | RSU1               | Depleted |
| V2LHS_38821 | VWCE               | Depleted |
| V2LHS_38984 | FITM1              | Depleted |
| V2LHS_39063 | RPGRIP1            | Depleted |
| V2LHS_39246 | PCNP               | Depleted |
| V2LHS_39433 | TMEM86A            | Depleted |
| V2LHS_41808 | SEMA3B             | Depleted |
| V2LHS_42115 | PPP4R4, RGD1560932 | Depleted |
| V2LHS_43104 | FAT1               | Depleted |
| V2LHS_43206 | ZSCAN4             | Depleted |
| V2LHS_43291 | PSD4               | Depleted |
| V2LHS_43421 | STAG3              | Depleted |
| V2LHS_43440 | TCTEX1D1           | Depleted |
| V2LHS_43845 | SERPINB11          | Depleted |
| V2LHS_44102 | METTL15            | Depleted |
| V2LHS_44139 | FANCB              | Depleted |
| V2LHS_44429 | BBS12              | Depleted |
| V2LHS_44665 | C1orf177           | Depleted |
| V2LHS_44671 | COL6A5             | Depleted |
| V2LHS_44693 | LRRC57             | Depleted |
| V2LHS_44786 | MCM9               | Depleted |
| V2LHS_4499  | NEMF               | Depleted |
| V2LHS_45694 | LACC1              | Depleted |
| V2LHS_46658 | GKN1               | Depleted |
| V2LHS_47150 | AP3D1              | Depleted |
| V2LHS_47202 | TRA2B              | Depleted |
| V2LHS_47311 | CD300LB            | Depleted |
| V2LHS_47563 | RP9, RP9P          | Depleted |
| V2LHS_48768 | TMEM151B           | Depleted |
| V2LHS_48896 | APLP1              | Depleted |

|             |           |          |
|-------------|-----------|----------|
| V2LHS_48985 | MARVELD2  | Depleted |
| V2LHS_4899  | GRAP2     | Depleted |
| V2LHS_49493 | GNG7      | Depleted |
| V2LHS_50120 | C7orf60   | Depleted |
| V2LHS_50211 | SNRNP48   | Depleted |
| V2LHS_50677 | C3orf30   | Depleted |
| V2LHS_50978 | CMC2      | Depleted |
| V2LHS_51300 | KANSL1L   | Depleted |
| V2LHS_51346 | CKAP2L    | Depleted |
| V2LHS_51395 | ENTHD1    | Depleted |
| V2LHS_51935 | SH3GLB2   | Depleted |
| V2LHS_51971 | ERRF1     | Depleted |
| V2LHS_51986 | ANKS1B    | Depleted |
| V2LHS_52173 | Gripap1   | Depleted |
| V2LHS_52937 | PER2      | Depleted |
| V2LHS_53478 | FAM26E    | Depleted |
| V2LHS_53480 | FAM26E    | Depleted |
| V2LHS_53623 | TMEM230   | Depleted |
| V2LHS_53688 | KDELC2    | Depleted |
| V2LHS_54172 | OR4B1     | Depleted |
| V2LHS_54189 | CPNE4     | Depleted |
| V2LHS_54203 | PRRC1     | Depleted |
| V2LHS_54781 | OR51T1    | Depleted |
| V2LHS_54837 | TMEM97    | Depleted |
| V2LHS_55037 | OR56A4    | Depleted |
| V2LHS_55614 | KLF14     | Depleted |
| V2LHS_55713 | SOX13     | Depleted |
| V2LHS_56145 | ZNF782    | Depleted |
| V2LHS_56694 | SRSF4     | Depleted |
| V2LHS_56708 | RHOXF1    | Depleted |
| V2LHS_56907 | C5orf51   | Depleted |
| V2LHS_56937 | CCL19     | Depleted |
| V2LHS_56945 | SRSF7     | Depleted |
| V2LHS_57314 | PRPH      | Depleted |
| V2LHS_57337 | DNAJC3    | Depleted |
| V2LHS_57663 | RSPH1     | Depleted |
| V2LHS_58252 | C20orf152 | Depleted |
| V2LHS_58310 | PNOC      | Depleted |
| V2LHS_58386 | RCAN3     | Depleted |
| V2LHS_58647 | FAM210B   | Depleted |
| V2LHS_59054 | XAGE5     | Depleted |
| V2LHS_59546 | OGN       | Depleted |
| V2LHS_6001  | AGR2      | Depleted |
| V2LHS_6007  | EXOSC2    | Depleted |
| V2LHS_60527 | GGA3      | Depleted |
| V2LHS_60693 | ZNF71     | Depleted |
| V2LHS_61955 | SMU1      | Depleted |

|             |               |          |
|-------------|---------------|----------|
| V2LHS_62252 | ZNF713        | Depleted |
| V2LHS_62367 | Calb1         | Depleted |
| V2LHS_62539 | CCDC71L       | Depleted |
| V2LHS_62635 | LMO2          | Depleted |
| V2LHS_62673 | Lmnb1         | Depleted |
| V2LHS_62873 | C12orf60      | Depleted |
| V2LHS_62931 | WTAP          | Depleted |
| V2LHS_62966 | RBM39         | Depleted |
| V2LHS_63087 | PXT1          | Depleted |
| V2LHS_63210 | KRTAP11-1     | Depleted |
| V2LHS_63386 | TTC21A        | Depleted |
| V2LHS_64110 | NPC1L1        | Depleted |
| V2LHS_64158 | SLC25A24      | Depleted |
| V2LHS_64160 | SLC25A24      | Depleted |
| V2LHS_64171 | Sgcz          | Depleted |
| V2LHS_64380 | APBA2         | Depleted |
| V2LHS_64393 | TIGD4         | Depleted |
| V2LHS_64522 | PDCD6IP       | Depleted |
| V2LHS_64525 | PDCD6IP       | Depleted |
| V2LHS_64723 | DNAJB1        | Depleted |
| V2LHS_64731 | PCOLCE2       | Depleted |
| V2LHS_64923 | SRSF12        | Depleted |
| V2LHS_64954 | DSE           | Depleted |
| V2LHS_64994 | TMEM50B       | Depleted |
| V2LHS_65083 | SLC47A2       | Depleted |
| V2LHS_65096 | WFDC2         | Depleted |
| V2LHS_65151 | Gm8675, Nedd1 | Depleted |
| V2LHS_65170 | PYDC1         | Depleted |
| V2LHS_65315 | HILPDA        | Depleted |
| V2LHS_65465 | C18orf8       | Depleted |
| V2LHS_65748 | NEUROD4       | Depleted |
| V2LHS_66013 | FAM216A       | Depleted |
| V2LHS_66055 | LDB3          | Depleted |
| V2LHS_6609  | TNFSF8        | Depleted |
| V2LHS_66260 | SUGP1         | Depleted |
| V2LHS_66702 | TBC1D25       | Depleted |
| V2LHS_66881 | WDR93         | Depleted |
| V2LHS_67367 | VPS26A        | Depleted |
| V2LHS_67406 | C14orf2       | Depleted |
| V2LHS_67455 | MRPL33        | Depleted |
| V2LHS_67672 | Tmem59        | Depleted |
| V2LHS_68292 | OR2Y1         | Depleted |
| V2LHS_68583 | ATPAF2        | Depleted |
| V2LHS_68716 | SNRNP40       | Depleted |
| V2LHS_69526 | C7orf29       | Depleted |
| V2LHS_69722 | FMNL3         | Depleted |
| V2LHS_69801 | DHX57         | Depleted |

|             |                          |          |
|-------------|--------------------------|----------|
| V2LHS_70713 | PPFIBP1                  | Depleted |
| V2LHS_70784 | RACGAP1                  | Depleted |
| V2LHS_70927 | PEX11G                   | Depleted |
| V2LHS_71018 | C11orf52, HSPB2-C11orf52 | Depleted |
| V2LHS_71080 | MSANTD3                  | Depleted |
| V2LHS_71342 | MKLN1                    | Depleted |
| V2LHS_71396 | PCNT                     | Depleted |
| V2LHS_71475 | SMAGP                    | Depleted |
| V2LHS_71746 | Vgll2                    | Depleted |
| V2LHS_71855 | Samd10                   | Depleted |
| V2LHS_71962 | OR5P3                    | Depleted |
| V2LHS_71977 | NLRP5                    | Depleted |
| V2LHS_72017 | CBLN4                    | Depleted |
| V2LHS_72018 | CBLN4                    | Depleted |
| V2LHS_72320 | PHTF2                    | Depleted |
| V2LHS_73271 | BCAN                     | Depleted |
| V2LHS_7360  | KLRC1                    | Depleted |
| V2LHS_78953 | STARD3                   | Depleted |
| V2LHS_80578 | FAF2                     | Depleted |
| V2LHS_86666 | PTPLAD2                  | Depleted |
| V2LHS_90718 | IBTK                     | Depleted |
| V2LHS_91982 | C12orf35                 | Depleted |
| V2LHS_9227  | WNT16                    | Depleted |
| V2LHS_93490 | KRT14                    | Depleted |
| V2LHS_94667 | AZGP1                    | Depleted |
| V2LHS_95003 | UPK1B                    | Depleted |
| V2LHS_95044 | Zbtb25                   | Depleted |
| V2LHS_95081 | CLDN10                   | Depleted |
| V2LHS_9526  | CXorf26                  | Depleted |
| V2LHS_95556 | SEC24D                   | Depleted |
| V2LHS_95855 | FAM13A                   | Depleted |
| V2LHS_95949 | COBLL1                   | Depleted |
| V2LHS_96000 | DOLK                     | Depleted |
| V2LHS_96103 | Cnksr2                   | Depleted |
| V2LHS_96119 | FASTKD2                  | Depleted |
| V2LHS_96122 | ZNF510                   | Depleted |
| V2LHS_96177 | TRAPPC8                  | Depleted |
| V2LHS_96588 | CNOT6                    | Depleted |
| V2LHS_96706 | Rwdd3                    | Depleted |
| V2LHS_96736 | KIAA1429                 | Depleted |
| V2LHS_96771 | C20orf4                  | Depleted |
| V2LHS_96790 | KRT23                    | Depleted |
| V2LHS_96816 | TRAF3IP2                 | Depleted |
| V2LHS_96833 | TBC1D10B                 | Depleted |
| V2LHS_96860 | ZZZ3                     | Depleted |
| V2LHS_97065 | SCCPDH                   | Depleted |
| V2LHS_97250 | C14orf166                | Depleted |

|              |                |          |
|--------------|----------------|----------|
| V2LHS_97417  | GOLT1B         | Depleted |
| V2LHS_97730  | INSIG2         | Depleted |
| V2LHS_97731  | INSIG2         | Depleted |
| V2LHS_98198  | FANCF          | Depleted |
| V2LHS_98489  | RABL5          | Depleted |
| V2LHS_98561  | IL25           | Depleted |
| V2LHS_98802  | C17orf39       | Depleted |
| V2LHS_98877  | NABP2          | Depleted |
| V2LHS_98979  | METTL16        | Depleted |
| V2LHS_99105  | COL18A1        | Depleted |
| V2LHS_99285  | HNRNPK         | Depleted |
| V2LHS_99331  | TEX12          | Depleted |
| V2LHS_99437  | PUS7L          | Depleted |
| V2LHS_99479  | N4BP2L1        | Depleted |
| V2LHS_99846  | TAGAP          | Depleted |
| V2LHS_99926  | ZFP82          | Depleted |
| V2LHS_100487 | KY             | Enriched |
| V2LHS_101112 | HSF5           | Enriched |
| V2LHS_101114 | HSF5           | Enriched |
| V2LHS_10154  | GIMAP5         | Enriched |
| V2LHS_10179  | UTP6           | Enriched |
| V2LHS_10218  | LRRRC59        | Enriched |
| V2LHS_102243 | TDRD6          | Enriched |
| V2LHS_104018 | OR10R2         | Enriched |
| V2LHS_111618 | IGFBP1         | Enriched |
| V2LHS_111780 | LTBP1          | Enriched |
| V2LHS_11180  | PAQR8          | Enriched |
| V2LHS_113258 | CSTF2          | Enriched |
| V2LHS_113267 | CSTF3          | Enriched |
| V2LHS_113888 | FLII           | Enriched |
| V2LHS_114284 | GRSF1          | Enriched |
| V2LHS_114364 | C1orf144       | Enriched |
| V2LHS_114478 | C1QTNF5, MFRP  | Enriched |
| V2LHS_115430 | Zfp110, ZNF274 | Enriched |
| V2LHS_11548  | MPZ            | Enriched |
| V2LHS_115803 | PIGP           | Enriched |
| V2LHS_116102 | MRPL51         | Enriched |
| V2LHS_117002 | APOLD1         | Enriched |
| V2LHS_117063 | CD1E           | Enriched |
| V2LHS_118686 | IQUB           | Enriched |
| V2LHS_12057  | CTCFL          | Enriched |
| V2LHS_120883 | OR4S2          | Enriched |
| V2LHS_12176  | ZBTB47         | Enriched |
| V2LHS_12517  | SLBP           | Enriched |
| V2LHS_12549  | DCTN6          | Enriched |
| V2LHS_12700  | ORC6           | Enriched |
| V2LHS_12824  | TBC1D5         | Enriched |



|              |          |          |
|--------------|----------|----------|
| V2LHS_130329 | CALML4   | Enriched |
| V2LHS_131107 | IL12A    | Enriched |
| V2LHS_131306 | PC       | Enriched |
| V2LHS_131819 | FRZB     | Enriched |
| V2LHS_131887 | GBAS     | Enriched |
| V2LHS_132258 | IFIT1    | Enriched |
| V2LHS_132259 | IFIT1    | Enriched |
| V2LHS_132658 | ARCN1    | Enriched |
| V2LHS_133279 | IFNA8    | Enriched |
| V2LHS_133338 | IL13     | Enriched |
| V2LHS_133503 | ITIH2    | Enriched |
| V2LHS_134079 | LSP1     | Enriched |
| V2LHS_134153 | TACSTD2  | Enriched |
| V2LHS_134217 | MAGEB2   | Enriched |
| V2LHS_134488 | RWDD1    | Enriched |
| V2LHS_134627 | HMP19    | Enriched |
| V2LHS_134684 | KLHL5    | Enriched |
| V2LHS_13501  | COPS6    | Enriched |
| V2LHS_135199 | FAM13B   | Enriched |
| V2LHS_135299 | ZNF644   | Enriched |
| V2LHS_135310 | MRPL35   | Enriched |
| V2LHS_135409 | PRR16    | Enriched |
| V2LHS_135643 | BRD9     | Enriched |
| V2LHS_135655 | ZSCAN18  | Enriched |
| V2LHS_135775 | FKRP     | Enriched |
| V2LHS_136068 | NOX5     | Enriched |
| V2LHS_136284 | CEP97    | Enriched |
| V2LHS_136317 | RIC3     | Enriched |
| V2LHS_136322 | METTL21D | Enriched |
| V2LHS_136410 | SH3TC2   | Enriched |
| V2LHS_13667  | KLHDC5   | Enriched |
| V2LHS_136686 | C3orf36  | Enriched |
| V2LHS_137027 | ZXDC     | Enriched |
| V2LHS_137128 | SPG11    | Enriched |
| V2LHS_137281 | CEP63    | Enriched |
| V2LHS_137566 | PDCD1LG2 | Enriched |
| V2LHS_137926 | FAM176A  | Enriched |
| V2LHS_138025 | SLA2     | Enriched |
| V2LHS_138224 | Zmynd15  | Enriched |
| V2LHS_138302 | PRPF38A  | Enriched |
| V2LHS_138529 | TMEM79   | Enriched |
| V2LHS_138639 | CHCHD6   | Enriched |
| V2LHS_138665 | ZNF397   | Enriched |
| V2LHS_139000 | CSRNP1   | Enriched |
| V2LHS_139009 | BBS4     | Enriched |
| V2LHS_139509 | CRAMP1L  | Enriched |
| V2LHS_139649 | RANBP10  | Enriched |

|              |          |          |
|--------------|----------|----------|
| V2LHS_140411 | FAM167A  | Enriched |
| V2LHS_141102 | FAM171A1 | Enriched |
| V2LHS_141105 | FAM171A1 | Enriched |
| V2LHS_142004 | AGBL1    | Enriched |
| V2LHS_142496 | PLEKHG7  | Enriched |
| V2LHS_142560 | FGD6     | Enriched |
| V2LHS_143072 | BSPH1    | Enriched |
| V2LHS_14475  | GZF1     | Enriched |
| V2LHS_14502  | KBTBD3   | Enriched |
| V2LHS_14787  | SZT2     | Enriched |
| V2LHS_149886 | Srsf1    | Enriched |
| V2LHS_15011  | DUOXA1   | Enriched |
| V2LHS_150160 | C9       | Enriched |
| V2LHS_150318 | CD1D     | Enriched |
| V2LHS_150394 | CD63     | Enriched |
| V2LHS_150395 | Cd63     | Enriched |
| V2LHS_150684 | CNN3     | Enriched |
| V2LHS_150924 | HAPLN1   | Enriched |
| V2LHS_151518 | FBLN1    | Enriched |
| V2LHS_151585 | MATN1    | Enriched |
| V2LHS_151639 | CD46     | Enriched |
| V2LHS_151871 | MNDA     | Enriched |
| V2LHS_151903 | MPV17    | Enriched |
| V2LHS_152160 | NDN      | Enriched |
| V2LHS_152413 | NVL      | Enriched |
| V2LHS_152804 | SEPW1    | Enriched |
| V2LHS_153237 | SNAPC4   | Enriched |
| V2LHS_153307 | Snx2     | Enriched |
| V2LHS_154019 | THBS1    | Enriched |
| V2LHS_154782 | ZNF395   | Enriched |
| V2LHS_15515  | TMED7    | Enriched |
| V2LHS_155620 | IPO9     | Enriched |
| V2LHS_155689 | HAUS2    | Enriched |
| V2LHS_15593  | KIAA0556 | Enriched |
| V2LHS_156079 | BTBD7    | Enriched |
| V2LHS_15681  | OCIAD2   | Enriched |
| V2LHS_157896 | ZNF669   | Enriched |
| V2LHS_158063 | ZNF671   | Enriched |
| V2LHS_158893 | EFS      | Enriched |
| V2LHS_160909 | FGD2     | Enriched |
| V2LHS_16249  | ZNF573   | Enriched |
| V2LHS_16732  | PEX11B   | Enriched |
| V2LHS_168844 | DUSP28   | Enriched |
| V2LHS_168897 | PITPNB   | Enriched |
| V2LHS_170134 | PLS1     | Enriched |
| V2LHS_171078 | PEX19    | Enriched |
| V2LHS_171268 | RASGRF1  | Enriched |

|              |                       |          |
|--------------|-----------------------|----------|
| V2LHS_171284 | RBBP8                 | Enriched |
| V2LHS_171909 | Vbp1                  | Enriched |
| V2LHS_171951 | VIP                   | Enriched |
| V2LHS_171978 | VSNL1                 | Enriched |
| V2LHS_172128 | ZNF267                | Enriched |
| V2LHS_172209 | ZNF132                | Enriched |
| V2LHS_172219 | ZNF133                | Enriched |
| V2LHS_172304 | ZNF189                | Enriched |
| V2LHS_172404 | SCG2                  | Enriched |
| V2LHS_173517 | PIGG                  | Enriched |
| V2LHS_173520 | PIGG                  | Enriched |
| V2LHS_173595 | TEX10                 | Enriched |
| V2LHS_173628 | TBC1D8B               | Enriched |
| V2LHS_174104 | TRNAU1AP              | Enriched |
| V2LHS_174117 | FAM120C               | Enriched |
| V2LHS_174261 | SLC25A38              | Enriched |
| V2LHS_174334 | ACSM5                 | Enriched |
| V2LHS_174537 | C14orf119             | Enriched |
| V2LHS_174540 | C14orf119             | Enriched |
| V2LHS_174547 | C14orf118, RGD1308907 | Enriched |
| V2LHS_174737 | ZNF587                | Enriched |
| V2LHS_174776 | Mrpl20                | Enriched |
| V2LHS_174894 | DET1                  | Enriched |
| V2LHS_175066 | LRRN3                 | Enriched |
| V2LHS_175177 | C5orf22               | Enriched |
| V2LHS_175333 | LSG1                  | Enriched |
| V2LHS_175433 | IL26                  | Enriched |
| V2LHS_175463 | LRP2BP                | Enriched |
| V2LHS_175469 | HJURP                 | Enriched |
| V2LHS_17554  | A2ML1                 | Enriched |
| V2LHS_175574 | DOK5                  | Enriched |
| V2LHS_175643 | VIMP                  | Enriched |
| V2LHS_176004 | GSDMB                 | Enriched |
| V2LHS_176219 | ETAA1                 | Enriched |
| V2LHS_176291 | FAM105A               | Enriched |
| V2LHS_17630  | WDR66                 | Enriched |
| V2LHS_176441 | MRPL50                | Enriched |
| V2LHS_176493 | MTMR12                | Enriched |
| V2LHS_176719 | Epb4.1l4b, Epb41l4b   | Enriched |
| V2LHS_176785 | ATAT1                 | Enriched |
| V2LHS_176920 | PCNXL2                | Enriched |
| V2LHS_176983 | WWC2                  | Enriched |
| V2LHS_177017 | FOXRED2               | Enriched |
| V2LHS_177468 | LRCH3                 | Enriched |
| V2LHS_177529 | Zc3h10                | Enriched |
| V2LHS_177650 | Tbrg1                 | Enriched |
| V2LHS_177653 | TBRG1                 | Enriched |

|              |          |          |
|--------------|----------|----------|
| V2LHS_177788 | FAM104A  | Enriched |
| V2LHS_177925 | SERAC1   | Enriched |
| V2LHS_177933 | FRAS1    | Enriched |
| V2LHS_178395 | KIAA1737 | Enriched |
| V2LHS_178658 | IGSF22   | Enriched |
| V2LHS_178735 | PROX2    | Enriched |
| V2LHS_178743 | FAM177A1 | Enriched |
| V2LHS_179336 | AQPEP    | Enriched |
| V2LHS_179340 | PLAC1L   | Enriched |
| V2LHS_179377 | C1orf101 | Enriched |
| V2LHS_179406 | DPY19L2  | Enriched |
| V2LHS_17972  | METTL21C | Enriched |
| V2LHS_179811 | CABLES2  | Enriched |
| V2LHS_180022 | TDRD9    | Enriched |
| V2LHS_180072 | ISCA2    | Enriched |
| V2LHS_180084 | AGPHD1   | Enriched |
| V2LHS_180085 | AGPHD1   | Enriched |
| V2LHS_180114 | C16orf87 | Enriched |
| V2LHS_180153 | ZBPB2    | Enriched |
| V2LHS_180323 | FSIP2    | Enriched |
| V2LHS_180329 | LYPD6    | Enriched |
| V2LHS_180427 | PAGE3    | Enriched |
| V2LHS_180828 | OTOL1    | Enriched |
| V2LHS_180833 | OR5H6    | Enriched |
| V2LHS_181143 | FAM216B  | Enriched |
| V2LHS_181188 | SERTM1   | Enriched |
| V2LHS_182322 | DNAJB12  | Enriched |
| V2LHS_182591 | QSER1    | Enriched |
| V2LHS_182939 | VSTM1    | Enriched |
| V2LHS_183302 | WNT4     | Enriched |
| V2LHS_18355  | TLE3     | Enriched |
| V2LHS_189013 | ZNF91    | Enriched |
| V2LHS_19022  | ZNF688   | Enriched |
| V2LHS_19146  | TMEM56   | Enriched |
| V2LHS_19393  | DNAJC19  | Enriched |
| V2LHS_196190 | GPX8     | Enriched |
| V2LHS_196625 | IGSF6    | Enriched |
| V2LHS_196788 | IVNS1ABP | Enriched |
| V2LHS_197404 | SND1-IT1 | Enriched |
| V2LHS_197628 | Pdcd10   | Enriched |
| V2LHS_197814 | MFAP3    | Enriched |
| V2LHS_198861 | AGR2     | Enriched |
| V2LHS_199021 | TRAM1    | Enriched |
| V2LHS_199050 | RBMS3    | Enriched |
| V2LHS_200463 | AP2S1    | Enriched |
| V2LHS_203573 | FGD3     | Enriched |
| V2LHS_203883 | ITGB3BP  | Enriched |

|              |               |          |
|--------------|---------------|----------|
| V2LHS_206060 | ISCU          | Enriched |
| V2LHS_20765  | KBTBD3        | Enriched |
| V2LHS_21038  | CABP4         | Enriched |
| V2LHS_212103 | HEPACAM2      | Enriched |
| V2LHS_214166 | NOXRED1       | Enriched |
| V2LHS_214413 | ZBTB11        | Enriched |
| V2LHS_214638 | GPRIN1        | Enriched |
| V2LHS_216983 | LYRM7         | Enriched |
| V2LHS_217945 | TRMT10C       | Enriched |
| V2LHS_218062 | LACTB         | Enriched |
| V2LHS_218205 | IWS1          | Enriched |
| V2LHS_218308 | ZNF84         | Enriched |
| V2LHS_218390 | THG1L         | Enriched |
| V2LHS_218527 | TSPAN4        | Enriched |
| V2LHS_218535 | SLC24A6       | Enriched |
| V2LHS_21855  | C15orf32      | Enriched |
| V2LHS_218609 | TMPO          | Enriched |
| V2LHS_218610 | BRIX1         | Enriched |
| V2LHS_218760 | BCOR          | Enriched |
| V2LHS_218918 | C5orf22       | Enriched |
| V2LHS_218932 | WDR52         | Enriched |
| V2LHS_219027 | WDR44         | Enriched |
| V2LHS_21906  | MKKS          | Enriched |
| V2LHS_219270 | PSMD10        | Enriched |
| V2LHS_219392 | CDKAL1        | Enriched |
| V2LHS_219634 | PPL           | Enriched |
| V2LHS_219811 | Pcdh17        | Enriched |
| V2LHS_219876 | DIRC2         | Enriched |
| V2LHS_219967 | WLS           | Enriched |
| V2LHS_220040 | WIPI1         | Enriched |
| V2LHS_220070 | ZPLD1         | Enriched |
| V2LHS_220253 | CMTM6         | Enriched |
| V2LHS_220686 | CXorf48       | Enriched |
| V2LHS_220779 | ORC1          | Enriched |
| V2LHS_220987 | ENOX1         | Enriched |
| V2LHS_221014 | TMEM176A      | Enriched |
| V2LHS_221027 | HAUS4         | Enriched |
| V2LHS_221084 | Gm5512, RMND1 | Enriched |
| V2LHS_221199 | FGD6          | Enriched |
| V2LHS_221312 | ITIH5         | Enriched |
| V2LHS_221360 | TATDN3        | Enriched |
| V2LHS_221407 | ACTBL2        | Enriched |
| V2LHS_221644 | DCAF6         | Enriched |
| V2LHS_221743 | RPP30         | Enriched |
| V2LHS_221759 | TMEM60        | Enriched |
| V2LHS_221814 | LRP2BP        | Enriched |
| V2LHS_222213 | CHN2          | Enriched |

|              |                                 |          |
|--------------|---------------------------------|----------|
| V2LHS_222259 | SDHAF2                          | Enriched |
| V2LHS_222299 | TMEM87B                         | Enriched |
| V2LHS_222382 | ZNF764                          | Enriched |
| V2LHS_222434 | SEC62                           | Enriched |
| V2LHS_222550 | ZNF132                          | Enriched |
| V2LHS_222741 | CLEC14A                         | Enriched |
| V2LHS_222981 | LTV1                            | Enriched |
| V2LHS_223300 | CCDC73                          | Enriched |
| V2LHS_223321 | PLS1                            | Enriched |
| V2LHS_223462 | MKX                             | Enriched |
| V2LHS_231147 | DEM1                            | Enriched |
| V2LHS_232746 | ZNF546                          | Enriched |
| V2LHS_23284  | OR14C36                         | Enriched |
| V2LHS_233950 | SLITRK6                         | Enriched |
| V2LHS_234010 | TNIP2                           | Enriched |
| V2LHS_234203 | TMEM134                         | Enriched |
| V2LHS_234211 | NMD3                            | Enriched |
| V2LHS_234237 | FAM118B                         | Enriched |
| V2LHS_234358 | OR2B2                           | Enriched |
| V2LHS_234882 | COQ10B                          | Enriched |
| V2LHS_235014 | C10orf118                       | Enriched |
| V2LHS_235115 | DENND3                          | Enriched |
| V2LHS_235135 | OXR1                            | Enriched |
| V2LHS_235613 | FAM175B                         | Enriched |
| V2LHS_23638  | KRT36                           | Enriched |
| V2LHS_236541 | GOLM1                           | Enriched |
| V2LHS_23658  | NCOA7                           | Enriched |
| V2LHS_236780 | CCDC121                         | Enriched |
| V2LHS_236867 | SLITRK6                         | Enriched |
| V2LHS_236871 | ITGA8                           | Enriched |
| V2LHS_237153 | IL12A                           | Enriched |
| V2LHS_237411 | POMC                            | Enriched |
| V2LHS_23753  | STX16                           | Enriched |
| V2LHS_237758 | 1110018J18Rik, AAED1, LOC498685 | Enriched |
| V2LHS_237898 | SNX27                           | Enriched |
| V2LHS_237960 | FAM24A                          | Enriched |
| V2LHS_238012 | SIKE1                           | Enriched |
| V2LHS_238239 | ITIH4                           | Enriched |
| V2LHS_239138 | TANK                            | Enriched |
| V2LHS_239767 | PARS2                           | Enriched |
| V2LHS_239988 | CTNNA1                          | Enriched |
| V2LHS_240071 | CEP57L1                         | Enriched |
| V2LHS_240336 | ZNF441                          | Enriched |
| V2LHS_240410 | SAGE1                           | Enriched |
| V2LHS_240491 | C4orf47                         | Enriched |
| V2LHS_240500 | KIAA0556                        | Enriched |
| V2LHS_240541 | ZNF627                          | Enriched |

|              |              |          |
|--------------|--------------|----------|
| V2LHS_240779 | CD81         | Enriched |
| V2LHS_240898 | MUM1L1       | Enriched |
| V2LHS_241166 | PLXNA2       | Enriched |
| V2LHS_241233 | TMEM68       | Enriched |
| V2LHS_241616 | ZNF445       | Enriched |
| V2LHS_24166  | NCAN         | Enriched |
| V2LHS_241767 | HIST1H4K     | Enriched |
| V2LHS_241839 | EID2B        | Enriched |
| V2LHS_241855 | SREK1IP1     | Enriched |
| V2LHS_241893 | CXorf61      | Enriched |
| V2LHS_241919 | ZNF513       | Enriched |
| V2LHS_242779 | YPEL4        | Enriched |
| V2LHS_242962 | GPR39, LYPD1 | Enriched |
| V2LHS_242967 | EBAG9        | Enriched |
| V2LHS_244761 | RIBC1        | Enriched |
| V2LHS_24497  | HENMT1       | Enriched |
| V2LHS_246267 | NREP         | Enriched |
| V2LHS_246649 | ARHGEF19     | Enriched |
| V2LHS_246980 | NRXN1        | Enriched |
| V2LHS_247035 | MRAP2        | Enriched |
| V2LHS_247951 | ERI2         | Enriched |
| V2LHS_250215 | PDZK1IP1     | Enriched |
| V2LHS_250508 | C6orf72      | Enriched |
| V2LHS_251013 | SLC17A9      | Enriched |
| V2LHS_251440 | ARPC1A       | Enriched |
| V2LHS_252502 | C1D          | Enriched |
| V2LHS_25411  | DEPDC4       | Enriched |
| V2LHS_254984 | TBC1D1       | Enriched |
| V2LHS_255610 | VPRBP        | Enriched |
| V2LHS_257476 | STARD3       | Enriched |
| V2LHS_257994 | SPIN1        | Enriched |
| V2LHS_258502 | FTL, ZNF385B | Enriched |
| V2LHS_259783 | NF2          | Enriched |
| V2LHS_261039 | LRRRC8B      | Enriched |
| V2LHS_261980 | SNIP1        | Enriched |
| V2LHS_262537 | VCAM1        | Enriched |
| V2LHS_263096 | SRSF6        | Enriched |
| V2LHS_263143 | ZNF341       | Enriched |
| V2LHS_26401  | RNF26, SYNC  | Enriched |
| V2LHS_264104 | CCDC80       | Enriched |
| V2LHS_264824 | TET2         | Enriched |
| V2LHS_264915 | CCDC3        | Enriched |
| V2LHS_264992 | ZNF426       | Enriched |
| V2LHS_265370 | CDSN         | Enriched |
| V2LHS_266855 | APOL2        | Enriched |
| V2LHS_267598 | TMEM63B      | Enriched |
| V2LHS_267774 | FAM19A4      | Enriched |

|              |                       |          |
|--------------|-----------------------|----------|
| V2LHS_268104 | INSIG2                | Enriched |
| V2LHS_269116 | MYEF2                 | Enriched |
| V2LHS_269922 | COL17A1               | Enriched |
| V2LHS_270209 | ZNF580                | Enriched |
| V2LHS_27184  | THOC5                 | Enriched |
| V2LHS_27389  | SLC9B2                | Enriched |
| V2LHS_27719  | Pkp4                  | Enriched |
| V2LHS_27723  | Pkp4                  | Enriched |
| V2LHS_27835  | MED20                 | Enriched |
| V2LHS_28103  | SLC22A13              | Enriched |
| V2LHS_28957  | ZNF276                | Enriched |
| V2LHS_29082  | SKA3                  | Enriched |
| V2LHS_29290  | ZNF439                | Enriched |
| V2LHS_29460  | CEP112                | Enriched |
| V2LHS_31213  | CCL17                 | Enriched |
| V2LHS_31238  | CCL18                 | Enriched |
| V2LHS_31260  | CCL5                  | Enriched |
| V2LHS_31298  | CCL2                  | Enriched |
| V2LHS_31299  | CCL2                  | Enriched |
| V2LHS_31708  | RAVER1                | Enriched |
| V2LHS_31855  | Lin54                 | Enriched |
| V2LHS_32993  | REG1A                 | Enriched |
| V2LHS_33092  | RDX                   | Enriched |
| V2LHS_33166  | RCN1                  | Enriched |
| V2LHS_33219  | OR1E1                 | Enriched |
| V2LHS_33224  | FAM98A                | Enriched |
| V2LHS_33234  | OR1G1                 | Enriched |
| V2LHS_33399  | HIST1H4E              | Enriched |
| V2LHS_33479  | SGSM2                 | Enriched |
| V2LHS_35984  | Zfc3h1                | Enriched |
| V2LHS_37051  | MAGEA8                | Enriched |
| V2LHS_38283  | SDK1                  | Enriched |
| V2LHS_41943  | BPIFC                 | Enriched |
| V2LHS_43511  | SPAG6                 | Enriched |
| V2LHS_45868  | MEPE                  | Enriched |
| V2LHS_46683  | SPAG9                 | Enriched |
| V2LHS_47165  | Gm5161, Gm8587, Snrpa | Enriched |
| V2LHS_52938  | PER2                  | Enriched |
| V2LHS_56799  | CCL25                 | Enriched |
| V2LHS_56999  | RGS4                  | Enriched |
| V2LHS_57022  | Tnrc6b                | Enriched |
| V2LHS_58337  | GJD2                  | Enriched |
| V2LHS_58560  | ZNF287                | Enriched |
| V2LHS_59099  | CNTNAP5               | Enriched |
| V2LHS_59254  | GDF3                  | Enriched |
| V2LHS_59435  | OR10Z1                | Enriched |
| V2LHS_59611  | MRPL42                | Enriched |



|             |               |          |
|-------------|---------------|----------|
| V2LHS_60150 | WDR37         | Enriched |
| V2LHS_60273 | CCDC56        | Enriched |
| V2LHS_60837 | PLEKHB1       | Enriched |
| V2LHS_62042 | DSC2          | Enriched |
| V2LHS_62175 | CDH15         | Enriched |
| V2LHS_62231 | CD8B          | Enriched |
| V2LHS_62628 | TCL1B         | Enriched |
| V2LHS_62748 | LMAN1         | Enriched |
| V2LHS_62885 | LCP2          | Enriched |
| V2LHS_63040 | PPP1R21       | Enriched |
| V2LHS_63202 | KRTAP8-1      | Enriched |
| V2LHS_63248 | IVL           | Enriched |
| V2LHS_6335  | RPS7          | Enriched |
| V2LHS_64291 | CRB3          | Enriched |
| V2LHS_64528 | NEFL          | Enriched |
| V2LHS_64679 | WFDC10A       | Enriched |
| V2LHS_64704 | ZNF225        | Enriched |
| V2LHS_65016 | PYGO1         | Enriched |
| V2LHS_65067 | ZNF17, ZNF548 | Enriched |
| V2LHS_65304 | SEC61A1       | Enriched |
| V2LHS_65502 | SNX10         | Enriched |
| V2LHS_65692 | UBIAD1        | Enriched |
| V2LHS_65850 | CADM3         | Enriched |
| V2LHS_66370 | CDH19         | Enriched |
| V2LHS_67163 | TMSB10        | Enriched |
| V2LHS_67917 | FAM212A       | Enriched |
| V2LHS_68101 | AP1M2         | Enriched |
| V2LHS_68676 | FAM189A2      | Enriched |
| V2LHS_68798 | GRAP2         | Enriched |
| V2LHS_68803 | THADA         | Enriched |
| V2LHS_69611 | MALL          | Enriched |
| V2LHS_70133 | KTI12         | Enriched |
| V2LHS_70435 | MRVI1         | Enriched |
| V2LHS_70619 | FLRT1         | Enriched |
| V2LHS_70981 | DSCR3         | Enriched |
| V2LHS_71100 | CCDC34        | Enriched |
| V2LHS_71142 | TMEM41A       | Enriched |
| V2LHS_71398 | PCNT          | Enriched |
| V2LHS_71567 | ERGIC1        | Enriched |
| V2LHS_71792 | C20orf160     | Enriched |
| V2LHS_73641 | RASGRP3       | Enriched |
| V2LHS_73695 | FAM115A       | Enriched |
| V2LHS_73858 | C20orf85      | Enriched |
| V2LHS_74465 | LEPROTL1      | Enriched |
| V2LHS_74615 | ASXL1         | Enriched |
| V2LHS_76758 | SGCB          | Enriched |
| V2LHS_76819 | SGCG          | Enriched |

|              |                                                                     |          |
|--------------|---------------------------------------------------------------------|----------|
| V2LHS_79901  | ESYT1                                                               | Enriched |
| V2LHS_8021   | GCFC2                                                               | Enriched |
| V2LHS_81160  | GREM2                                                               | Enriched |
| V2LHS_81324  | SLC38A10                                                            | Enriched |
| V2LHS_82762  | GP1BA                                                               | Enriched |
| V2LHS_85381  | Olf239, Olf255, Olf1090, Olf1091, Olf1092, Olf1093, Olf1095, OR10H3 | Enriched |
| V2LHS_85785  | BTNL3                                                               | Enriched |
| V2LHS_86605  | KIAA0922                                                            | Enriched |
| V2LHS_87299  | HERPUD2                                                             | Enriched |
| V2LHS_87876  | ZFYVE20                                                             | Enriched |
| V2LHS_91329  | EML5                                                                | Enriched |
| V2LHS_92446  | SGCD                                                                | Enriched |
| V2LHS_94512  | ANXA5                                                               | Enriched |
| V2LHS_95276  | SPOCK2                                                              | Enriched |
| V2LHS_95519  | PSMD6                                                               | Enriched |
| V2LHS_95752  | FAM20B                                                              | Enriched |
| V2LHS_96826  | CLIP3                                                               | Enriched |
| V2LHS_97160  | OTUD6B                                                              | Enriched |
| V2LHS_97212  | ELOVL1                                                              | Enriched |
| V2LHS_97500  | WNT16                                                               | Enriched |
| V2LHS_9774   | ZCCHC2                                                              | Enriched |
| V2LHS_98116  | JUP                                                                 | Enriched |
| V2LHS_98169  | ANAPC1, LOC285074                                                   | Enriched |
| V2LHS_98414  | MICAL1                                                              | Enriched |
| V2LHS_98652  | MRP63                                                               | Enriched |
| V2LHS_99249  | SEH1L                                                               | Enriched |
| V2LHS_100809 | MYLK3                                                               | Kinase   |
| V2LHS_100859 | MAP3K1                                                              | Kinase   |
| V2LHS_100862 | MAP3K1                                                              | Kinase   |
| V2LHS_100863 | MAP3K1                                                              | Kinase   |
| V2LHS_100945 | LMTK3                                                               | Kinase   |
| V2LHS_101561 | Pdik1l                                                              | Kinase   |
| V2LHS_101745 | EPHA4                                                               | Kinase   |
| V2LHS_101750 | Epha4                                                               | Kinase   |
| V2LHS_101877 | NIM1                                                                | Kinase   |
| V2LHS_102069 | AK5                                                                 | Kinase   |
| V2LHS_102271 | TTBK1                                                               | Kinase   |
| V2LHS_102318 | DGKB                                                                | Kinase   |
| V2LHS_1032   | Ilk                                                                 | Kinase   |
| V2LHS_104881 | CALM2                                                               | Kinase   |
| V2LHS_1112   | CSK                                                                 | Kinase   |
| V2LHS_112519 | Dck                                                                 | Kinase   |
| V2LHS_112523 | DCK                                                                 | Kinase   |
| V2LHS_112524 | Dck                                                                 | Kinase   |
| V2LHS_112599 | BMPR1B                                                              | Kinase   |
| V2LHS_112601 | BMPR1B                                                              | Kinase   |
| V2LHS_112605 | BMPR2                                                               | Kinase   |

|              |        |        |
|--------------|--------|--------|
| V2LHS_112633 | BUB1B  | Kinase |
| V2LHS_112634 | BUB1B  | Kinase |
| V2LHS_112635 | BUB1B  | Kinase |
| V2LHS_112688 | CAMK2B | Kinase |
| V2LHS_112695 | CAMK2D | Kinase |
| V2LHS_112696 | CAMK2D | Kinase |
| V2LHS_112697 | CAMK2D | Kinase |
| V2LHS_112906 | CDK6   | Kinase |
| V2LHS_112911 | CDK8   | Kinase |
| V2LHS_112994 | CHEK1  | Kinase |
| V2LHS_112996 | CHEK1  | Kinase |
| V2LHS_113011 | CHKA   | Kinase |
| V2LHS_113012 | CHKA   | Kinase |
| V2LHS_113017 | CHUK   | Kinase |
| V2LHS_113018 | CHUK   | Kinase |
| V2LHS_113019 | CHUK   | Kinase |
| V2LHS_113021 | CHUK   | Kinase |
| V2LHS_113215 | MAPK14 | Kinase |
| V2LHS_113218 | MAPK14 | Kinase |
| V2LHS_113220 | MAPK14 | Kinase |
| V2LHS_113362 | DGKA   | Kinase |
| V2LHS_113368 | Dgkg   | Kinase |
| V2LHS_113370 | DGKG   | Kinase |
| V2LHS_113379 | DAPK3  | Kinase |
| V2LHS_113459 | Dlg2   | Kinase |
| V2LHS_113585 | DYRK1A | Kinase |
| V2LHS_113769 | ERN1   | Kinase |
| V2LHS_113770 | ERN1   | Kinase |
| V2LHS_113771 | ERN1   | Kinase |
| V2LHS_113824 | FES    | Kinase |
| V2LHS_113893 | FLT1   | Kinase |
| V2LHS_113897 | FLT1   | Kinase |
| V2LHS_113965 | FRK    | Kinase |
| V2LHS_113967 | Frk    | Kinase |
| V2LHS_113970 | FRK    | Kinase |
| V2LHS_114032 | GALK2  | Kinase |
| V2LHS_114230 | GRK6   | Kinase |
| V2LHS_114290 | GSK3B  | Kinase |
| V2LHS_114291 | GSK3B  | Kinase |
| V2LHS_114293 | GSK3B  | Kinase |
| V2LHS_114731 | MINK1  | Kinase |
| V2LHS_115020 | NLK    | Kinase |
| V2LHS_115023 | Nlk    | Kinase |
| V2LHS_115226 | SGK2   | Kinase |
| V2LHS_115242 | TAOK3  | Kinase |
| V2LHS_115244 | TAOK3  | Kinase |
| V2LHS_115245 | TAOK3  | Kinase |

|              |                     |        |
|--------------|---------------------|--------|
| V2LHS_115251 | AK3                 | Kinase |
| V2LHS_115293 | IP6K2               | Kinase |
| V2LHS_115825 | VRK3                | Kinase |
| V2LHS_115830 | CRIM1               | Kinase |
| V2LHS_115834 | CRIM1               | Kinase |
| V2LHS_115906 | PRKD2               | Kinase |
| V2LHS_115907 | PRKD2               | Kinase |
| V2LHS_117169 | STK31               | Kinase |
| V2LHS_117170 | STK31               | Kinase |
| V2LHS_117171 | STK31               | Kinase |
| V2LHS_117188 | MARK4               | Kinase |
| V2LHS_117192 | MARK4               | Kinase |
| V2LHS_117266 | UCK1                | Kinase |
| V2LHS_117267 | UCK1                | Kinase |
| V2LHS_117433 | RPS6KL1             | Kinase |
| V2LHS_117524 | RIOK1               | Kinase |
| V2LHS_117527 | RIOK1               | Kinase |
| V2LHS_117660 | TSSK1B              | Kinase |
| V2LHS_118232 | ALPK2               | Kinase |
| V2LHS_118425 | ZAK                 | Kinase |
| V2LHS_1185   | STK33               | Kinase |
| V2LHS_118969 | MAP3K9              | Kinase |
| V2LHS_119612 | HIPK2               | Kinase |
| V2LHS_119851 | NEK10               | Kinase |
| V2LHS_120025 | DCLK2               | Kinase |
| V2LHS_120494 | KSR2                | Kinase |
| V2LHS_12364  | AURKA, AURKAPS1     | Kinase |
| V2LHS_1242   | FPGT-TNNI3K, TNNI3K | Kinase |
| V2LHS_12504  | TRIM27              | Kinase |
| V2LHS_1251   | KSR1                | Kinase |
| V2LHS_130235 | IKBKB               | Kinase |
| V2LHS_130452 | ADCK5               | Kinase |
| V2LHS_130454 | ADCK5               | Kinase |
| V2LHS_130498 | CDK18               | Kinase |
| V2LHS_130499 | CDK18               | Kinase |
| V2LHS_130500 | CDK18               | Kinase |
| V2LHS_130975 | GUK1                | Kinase |
| V2LHS_131070 | IGF1R               | Kinase |
| V2LHS_131071 | IGF1R               | Kinase |
| V2LHS_131072 | IGF1R               | Kinase |
| V2LHS_131240 | NPR2                | Kinase |
| V2LHS_132106 | GUCY2F              | Kinase |
| V2LHS_132369 | IRAK1               | Kinase |
| V2LHS_132372 | IRAK2               | Kinase |
| V2LHS_132374 | IRAK2               | Kinase |
| V2LHS_132477 | ADRBK1              | Kinase |
| V2LHS_132497 | AK2                 | Kinase |

|              |                     |        |
|--------------|---------------------|--------|
| V2LHS_132502 | Akt2                | Kinase |
| V2LHS_132657 | ARAF                | Kinase |
| V2LHS_133007 | HCK                 | Kinase |
| V2LHS_133010 | HCK                 | Kinase |
| V2LHS_133532 | ITPKB               | Kinase |
| V2LHS_133534 | ITPKB               | Kinase |
| V2LHS_133559 | JAK1                | Kinase |
| V2LHS_133562 | JAK1                | Kinase |
| V2LHS_133563 | JAK1                | Kinase |
| V2LHS_133709 | KDR                 | Kinase |
| V2LHS_133711 | KDR                 | Kinase |
| V2LHS_133712 | KDR                 | Kinase |
| V2LHS_133714 | KDR                 | Kinase |
| V2LHS_134105 | LTK                 | Kinase |
| V2LHS_134140 | LYN                 | Kinase |
| V2LHS_134142 | LYN                 | Kinase |
| V2LHS_134144 | Lyn                 | Kinase |
| V2LHS_134621 | FPGT-TNNI3K, TNNI3K | Kinase |
| V2LHS_134623 | FPGT-TNNI3K, TNNI3K | Kinase |
| V2LHS_134634 | CAMK2A              | Kinase |
| V2LHS_134635 | CAMK2A              | Kinase |
| V2LHS_13468  | TRIM27              | Kinase |
| V2LHS_134765 | CDKL3               | Kinase |
| V2LHS_134769 | CDKL3               | Kinase |
| V2LHS_1359   | MAP3K12, PCBP2      | Kinase |
| V2LHS_136512 | PANK3               | Kinase |
| V2LHS_136515 | PANK3               | Kinase |
| V2LHS_137168 | ALPK1               | Kinase |
| V2LHS_137169 | ALPK1               | Kinase |
| V2LHS_137333 | ITPKC               | Kinase |
| V2LHS_137339 | TRIB1               | Kinase |
| V2LHS_137340 | TRIB1               | Kinase |
| V2LHS_137534 | COASY               | Kinase |
| V2LHS_138103 | SGK196              | Kinase |
| V2LHS_138864 | WNK4                | Kinase |
| V2LHS_138866 | WNK4                | Kinase |
| V2LHS_139500 | DYRK4               | Kinase |
| V2LHS_139832 | PSTK                | Kinase |
| V2LHS_139856 | KSR2                | Kinase |
| V2LHS_139857 | KSR2                | Kinase |
| V2LHS_140653 | NRK                 | Kinase |
| V2LHS_140676 | HIPK1               | Kinase |
| V2LHS_140950 | NEK5                | Kinase |
| V2LHS_140951 | Nek5                | Kinase |
| V2LHS_140954 | NEK5                | Kinase |
| V2LHS_1430   | TRIO                | Kinase |
| V2LHS_1432   | TRIO                | Kinase |

|              |         |        |
|--------------|---------|--------|
| V2LHS_1435   | PLK4    | Kinase |
| V2LHS_1500   | EIF2AK1 | Kinase |
| V2LHS_150029 | BLK     | Kinase |
| V2LHS_150031 | BLK     | Kinase |
| V2LHS_150062 | BMX     | Kinase |
| V2LHS_150063 | BMX     | Kinase |
| V2LHS_150067 | BMX     | Kinase |
| V2LHS_150092 | BRDT    | Kinase |
| V2LHS_150093 | BRDT    | Kinase |
| V2LHS_150095 | BRDT    | Kinase |
| V2LHS_150194 | CALM2   | Kinase |
| V2LHS_150195 | CALM2   | Kinase |
| V2LHS_150477 | CDK2    | Kinase |
| V2LHS_150483 | CDK7    | Kinase |
| V2LHS_150484 | CDK7    | Kinase |
| V2LHS_150486 | CDK7    | Kinase |
| V2LHS_150487 | CDK7    | Kinase |
| V2LHS_150588 | CKB     | Kinase |
| V2LHS_150598 | CKMT2   | Kinase |
| V2LHS_150603 | CKS1B   | Kinase |
| V2LHS_150605 | CKS1B   | Kinase |
| V2LHS_150973 | CSNK1A1 | Kinase |
| V2LHS_150979 | CSNK1D  | Kinase |
| V2LHS_150990 | CSNK2A1 | Kinase |
| V2LHS_150997 | CSNK2A2 | Kinase |
| V2LHS_15109  | BUB1    | Kinase |
| V2LHS_151167 | DGUOK   | Kinase |
| V2LHS_151186 | MPP3    | Kinase |
| V2LHS_151336 | EFNA5   | Kinase |
| V2LHS_151339 | EFNA5   | Kinase |
| V2LHS_151453 | ERBB3   | Kinase |
| V2LHS_151568 | Mark3   | Kinase |
| V2LHS_151569 | MARK3   | Kinase |
| V2LHS_151570 | MARK3   | Kinase |
| V2LHS_151571 | MARK3   | Kinase |
| V2LHS_15164  | BRAF    | Kinase |
| V2LHS_15167  | BRAF    | Kinase |
| V2LHS_15168  | BRAF    | Kinase |
| V2LHS_151699 | MAP3K3  | Kinase |
| V2LHS_15179  | BMPR1A  | Kinase |
| V2LHS_15183  | BMPR1A  | Kinase |
| V2LHS_15184  | BMPR1A  | Kinase |
| V2LHS_151897 | MPP1    | Kinase |
| V2LHS_151951 | MAP3K10 | Kinase |
| V2LHS_151956 | MST1R   | Kinase |
| V2LHS_152207 | NEK2    | Kinase |
| V2LHS_152208 | NEK2    | Kinase |

|              |                    |        |
|--------------|--------------------|--------|
| V2LHS_152297 | NME3               | Kinase |
| V2LHS_152388 | NTRK1              | Kinase |
| V2LHS_152393 | NTRK3              | Kinase |
| V2LHS_152621 | PAK1               | Kinase |
| V2LHS_152627 | Pak2               | Kinase |
| V2LHS_152634 | Pak3               | Kinase |
| V2LHS_152707 | PCK1               | Kinase |
| V2LHS_152727 | CDK17              | Kinase |
| V2LHS_152729 | Cdk17              | Kinase |
| V2LHS_152730 | CDK17              | Kinase |
| V2LHS_152807 | Map2k4, MAP2K4P1   | Kinase |
| V2LHS_153502 | SRPK1              | Kinase |
| V2LHS_153513 | SRPK2              | Kinase |
| V2LHS_153599 | NEK4               | Kinase |
| V2LHS_153601 | NEK4               | Kinase |
| V2LHS_153602 | NEK4               | Kinase |
| V2LHS_153603 | NEK4               | Kinase |
| V2LHS_153607 | AURKA              | Kinase |
| V2LHS_153611 | CDKL5              | Kinase |
| V2LHS_153614 | CDKL5              | Kinase |
| V2LHS_153615 | CDKL5              | Kinase |
| V2LHS_153617 | AURKC              | Kinase |
| V2LHS_153621 | AURKC, H19         | Kinase |
| V2LHS_153622 | Rps6kb1            | Kinase |
| V2LHS_153624 | RPS6KB1            | Kinase |
| V2LHS_153625 | RPS6KB1            | Kinase |
| V2LHS_153701 | SYK                | Kinase |
| V2LHS_153702 | SYK                | Kinase |
| V2LHS_153703 | SYK                | Kinase |
| V2LHS_153705 | 2310003L22Rik, SYK | Kinase |
| V2LHS_153758 | MAP3K7             | Kinase |
| V2LHS_153874 | TEC                | Kinase |
| V2LHS_154358 | MYO3A              | Kinase |
| V2LHS_154619 | NAGK               | Kinase |
| V2LHS_154620 | NAGK               | Kinase |
| V2LHS_154640 | MKNK2              | Kinase |
| V2LHS_154641 | MKNK2              | Kinase |
| V2LHS_154729 | Bmp2k              | Kinase |
| V2LHS_155076 | TRPM6              | Kinase |
| V2LHS_155078 | TRPM6              | Kinase |
| V2LHS_155132 | TRPM7              | Kinase |
| V2LHS_155135 | TRPM7              | Kinase |
| V2LHS_15550  | MAST4              | Kinase |
| V2LHS_15552  | MAST4              | Kinase |
| V2LHS_15557  | ALK                | Kinase |
| V2LHS_156131 | N4BP2              | Kinase |
| V2LHS_156133 | N4BP2              | Kinase |

|              |          |        |
|--------------|----------|--------|
| V2LHS_15620  | ACVR1B   | Kinase |
| V2LHS_15621  | ACVR1B   | Kinase |
| V2LHS_15623  | MAST4    | Kinase |
| V2LHS_156310 | ETNK2    | Kinase |
| V2LHS_156313 | ETNK2    | Kinase |
| V2LHS_156349 | PANK4    | Kinase |
| V2LHS_156350 | PANK4    | Kinase |
| V2LHS_156457 | AGK      | Kinase |
| V2LHS_15650  | ULK3     | Kinase |
| V2LHS_156888 | FN3KRP   | Kinase |
| V2LHS_157060 | LRRK1    | Kinase |
| V2LHS_157878 | NEK11    | Kinase |
| V2LHS_157879 | NEK11    | Kinase |
| V2LHS_158091 | THNSL1   | Kinase |
| V2LHS_158871 | GSG2     | Kinase |
| V2LHS_158872 | GSG2     | Kinase |
| V2LHS_158902 | PKIB     | Kinase |
| V2LHS_158905 | PKIB     | Kinase |
| V2LHS_159912 | TBCK     | Kinase |
| V2LHS_159913 | TBCK     | Kinase |
| V2LHS_159915 | NEK9     | Kinase |
| V2LHS_159916 | NEK9     | Kinase |
| V2LHS_159919 | NEK9     | Kinase |
| V2LHS_159928 | MYLK2    | Kinase |
| V2LHS_159970 | PSKH2    | Kinase |
| V2LHS_159971 | PSKH2    | Kinase |
| V2LHS_159973 | PSKH2    | Kinase |
| V2LHS_159974 | PSKH2    | Kinase |
| V2LHS_160137 | GK2      | Kinase |
| V2LHS_160138 | GK2      | Kinase |
| V2LHS_1616   | ALPK3    | Kinase |
| V2LHS_16186  | DTYMK    | Kinase |
| V2LHS_162397 | CDC42BPA | Kinase |
| V2LHS_162398 | CDC42BPA | Kinase |
| V2LHS_162399 | CDC42BPA | Kinase |
| V2LHS_163173 | IPPK     | Kinase |
| V2LHS_1643   | MERTK    | Kinase |
| V2LHS_1645   | MERTK    | Kinase |
| V2LHS_16875  | RIOK3    | Kinase |
| V2LHS_168769 | MERTK    | Kinase |
| V2LHS_16878  | RIOK3    | Kinase |
| V2LHS_16880  | RIOK3    | Kinase |
| V2LHS_169662 | LIMK2    | Kinase |
| V2LHS_169803 | PDGFRB   | Kinase |
| V2LHS_169804 | PDK1     | Kinase |
| V2LHS_169805 | PDK1     | Kinase |
| V2LHS_169809 | PDK1     | Kinase |



|              |              |        |
|--------------|--------------|--------|
| V2LHS_169811 | PDK2         | Kinase |
| V2LHS_169815 | PDK2         | Kinase |
| V2LHS_169816 | PDK4         | Kinase |
| V2LHS_169818 | PDK4         | Kinase |
| V2LHS_169821 | PDK4         | Kinase |
| V2LHS_169824 | PDPK1, PDPK2 | Kinase |
| V2LHS_169888 | PFKFB1       | Kinase |
| V2LHS_169889 | PFKFB1       | Kinase |
| V2LHS_169890 | PFKFB1       | Kinase |
| V2LHS_169891 | PFKFB1       | Kinase |
| V2LHS_169893 | PFKFB1       | Kinase |
| V2LHS_169898 | PFKL         | Kinase |
| V2LHS_169903 | PFKP         | Kinase |
| V2LHS_169956 | PHKA1        | Kinase |
| V2LHS_169959 | PHKA1        | Kinase |
| V2LHS_169997 | PIK3C2A      | Kinase |
| V2LHS_1700   | SRPK3        | Kinase |
| V2LHS_170005 | PIK3C2B      | Kinase |
| V2LHS_170007 | PIK3C2B      | Kinase |
| V2LHS_170018 | PIM1         | Kinase |
| V2LHS_170019 | PIM1         | Kinase |
| V2LHS_170021 | PIK3CG       | Kinase |
| V2LHS_170022 | PIK3CG       | Kinase |
| V2LHS_170024 | PIK3CG       | Kinase |
| V2LHS_170027 | PI4KA        | Kinase |
| V2LHS_170034 | PI4KB        | Kinase |
| V2LHS_170051 | PKM          | Kinase |
| V2LHS_170174 | EXOSC10      | Kinase |
| V2LHS_170175 | EXOSC10      | Kinase |
| V2LHS_17021  | RIPK2        | Kinase |
| V2LHS_170398 | PRKACA       | Kinase |
| V2LHS_170408 | PRKACB       | Kinase |
| V2LHS_170417 | PRKAG1       | Kinase |
| V2LHS_170420 | PRKAG1       | Kinase |
| V2LHS_170425 | PRKAR1A      | Kinase |
| V2LHS_170426 | PRKAR1A      | Kinase |
| V2LHS_170429 | PRKAR2B      | Kinase |
| V2LHS_170430 | Prkar2b      | Kinase |
| V2LHS_170431 | PRKAR2B      | Kinase |
| V2LHS_170433 | PRKCA        | Kinase |
| V2LHS_170435 | PRKCA        | Kinase |
| V2LHS_170440 | PRKCB        | Kinase |
| V2LHS_170441 | PRKCB        | Kinase |
| V2LHS_170442 | PRKCB        | Kinase |
| V2LHS_170449 | PRKCG        | Kinase |
| V2LHS_170450 | PRKCG        | Kinase |
| V2LHS_170453 | PRKCI        | Kinase |

|              |              |        |
|--------------|--------------|--------|
| V2LHS_170454 | PRKCI        | Kinase |
| V2LHS_170459 | PKN1         | Kinase |
| V2LHS_170464 | PRKD1        | Kinase |
| V2LHS_170465 | PRKD1        | Kinase |
| V2LHS_170466 | PRKD1        | Kinase |
| V2LHS_170467 | PRKD1        | Kinase |
| V2LHS_170471 | PRKCSH       | Kinase |
| V2LHS_170474 | PRKCSH       | Kinase |
| V2LHS_170489 | MAPK4        | Kinase |
| V2LHS_170495 | MAPK6        | Kinase |
| V2LHS_170499 | MAPK8        | Kinase |
| V2LHS_170501 | Mapk8        | Kinase |
| V2LHS_170503 | MAPK8        | Kinase |
| V2LHS_170506 | MAPK11       | Kinase |
| V2LHS_170511 | MAPK9        | Kinase |
| V2LHS_170513 | MAPK9        | Kinase |
| V2LHS_170514 | MAPK9        | Kinase |
| V2LHS_170515 | MAPK9        | Kinase |
| V2LHS_170520 | MAPK10       | Kinase |
| V2LHS_170521 | MAPK10       | Kinase |
| V2LHS_170523 | MAPK13       | Kinase |
| V2LHS_170525 | MAPK13       | Kinase |
| V2LHS_170527 | MAPK13       | Kinase |
| V2LHS_170531 | MAP2K1       | Kinase |
| V2LHS_170548 | MAP2K6       | Kinase |
| V2LHS_170550 | MAP2K6       | Kinase |
| V2LHS_170553 | EIF2AK2      | Kinase |
| V2LHS_170554 | EIF2AK2      | Kinase |
| V2LHS_170588 | PRPS2        | Kinase |
| V2LHS_170876 | TWF1         | Kinase |
| V2LHS_170879 | Gm4887, Twf1 | Kinase |
| V2LHS_171092 | ALDH18A1     | Kinase |
| V2LHS_171093 | ALDH18A1     | Kinase |
| V2LHS_171096 | ALDH18A1     | Kinase |
| V2LHS_171097 | ALDH18A1     | Kinase |
| V2LHS_171213 | Raf1         | Kinase |
| V2LHS_171214 | RAF1         | Kinase |
| V2LHS_171626 | TTK          | Kinase |
| V2LHS_171628 | TTK          | Kinase |
| V2LHS_171630 | TTK          | Kinase |
| V2LHS_171702 | TYK2         | Kinase |
| V2LHS_171969 | VRK1         | Kinase |
| V2LHS_171972 | VRK1         | Kinase |
| V2LHS_172007 | WEE1         | Kinase |
| V2LHS_172009 | Wee1         | Kinase |
| V2LHS_172837 | CLK1, PPIL3  | Kinase |
| V2LHS_172853 | PLK3         | Kinase |

|              |         |        |
|--------------|---------|--------|
| V2LHS_172854 | PLK3    | Kinase |
| V2LHS_172916 | DLG1    | Kinase |
| V2LHS_172917 | DLG1    | Kinase |
| V2LHS_172999 | PTK2B   | Kinase |
| V2LHS_173081 | FLT3    | Kinase |
| V2LHS_17311  | HIPK4   | Kinase |
| V2LHS_173257 | PRKAR2A | Kinase |
| V2LHS_173260 | Prkar2a | Kinase |
| V2LHS_173262 | PRKAR2A | Kinase |
| V2LHS_173443 | SNRK    | Kinase |
| V2LHS_173445 | SNRK    | Kinase |
| V2LHS_173447 | SNRK    | Kinase |
| V2LHS_173822 | MAP4K4  | Kinase |
| V2LHS_173824 | MAP4K4  | Kinase |
| V2LHS_174175 | UCKL1   | Kinase |
| V2LHS_174177 | UCKL1   | Kinase |
| V2LHS_174178 | UCKL1   | Kinase |
| V2LHS_17422  | RIPK1   | Kinase |
| V2LHS_174320 | ULK4    | Kinase |
| V2LHS_174321 | ULK4    | Kinase |
| V2LHS_174322 | ULK4    | Kinase |
| V2LHS_174323 | ULK4    | Kinase |
| V2LHS_174324 | ULK4    | Kinase |
| V2LHS_175087 | RFK     | Kinase |
| V2LHS_175088 | RFK     | Kinase |
| V2LHS_175091 | RFK     | Kinase |
| V2LHS_175109 | RIOK2   | Kinase |
| V2LHS_175422 | STK32B  | Kinase |
| V2LHS_175426 | STK32B  | Kinase |
| V2LHS_175427 | STK32B  | Kinase |
| V2LHS_175543 | PI4K2A  | Kinase |
| V2LHS_175545 | PI4K2A  | Kinase |
| V2LHS_175546 | PI4K2A  | Kinase |
| V2LHS_175547 | PI4K2A  | Kinase |
| V2LHS_175901 | PBK     | Kinase |
| V2LHS_176052 | CSNK1A1 | Kinase |
| V2LHS_176053 | CSNK1A1 | Kinase |
| V2LHS_176124 | STRADB  | Kinase |
| V2LHS_176126 | STRADB  | Kinase |
| V2LHS_176128 | STRADB  | Kinase |
| V2LHS_177043 | PANK2   | Kinase |
| V2LHS_177044 | PANK2   | Kinase |
| V2LHS_177045 | PANK2   | Kinase |
| V2LHS_177047 | PANK2   | Kinase |
| V2LHS_17714  | EPHB6   | Kinase |
| V2LHS_17715  | EPHB6   | Kinase |
| V2LHS_17717  | EPHB6   | Kinase |

|              |         |          |
|--------------|---------|----------|
| V2LHS_17735  | EPHA7   | Kinase   |
| V2LHS_17738  | EPHA7   | Kinase   |
| V2LHS_17739  | EPHA7   | Kinase   |
| V2LHS_17742  | EPHB1   | Kinase   |
| V2LHS_17762  | EPHB2   | Kinase   |
| V2LHS_17763  | EPHB2   | Kinase   |
| V2LHS_17765  | EPHB3   | Kinase   |
| V2LHS_177826 | MASTL   | Kinase   |
| V2LHS_177827 | MASTL   | Kinase   |
| V2LHS_177829 | MASTL   | Kinase   |
| V2LHS_178486 | TPD52L3 | Kinase   |
| V2LHS_178537 | TP53RK  | Kinase   |
| V2LHS_178600 | STK32C  | Kinase   |
| V2LHS_17861  | EPHA4   | Kinase   |
| V2LHS_17961  | EPHA2   | Kinase   |
| V2LHS_179675 | WNK3    | Kinase   |
| V2LHS_179929 | STRADA  | Kinase   |
| V2LHS_180422 | PNCK    | Kinase   |
| V2LHS_180465 | CDKL4   | Kinase   |
| V2LHS_180559 | DGKK    | Kinase   |
| V2LHS_1826   | TESK2   | Kinase   |
| V2LHS_1831   | STK25   | Kinase   |
| V2LHS_1843   | DLG2    | Kinase   |
| V2LHS_184616 | BRD3    | Kinase   |
| V2LHS_184621 | BRD3    | Kinase   |
| V2LHS_18490  | KCNH8   | Kinase   |
| V2LHS_18519  | TLK1    | Kinase   |
| V2LHS_18524  | KCNH8   | Kinase   |
| V2LHS_18527  | KCNH8   | Kinase   |
| V2LHS_185598 | TK2     | Kinase   |
| V2LHS_18724  | UHMK1   | Kinase   |
| V2LHS_18725  | UHMK1   | Kinase   |
| V2LHS_18726  | Uhmk1   | Kinase   |
| V2LHS_18749  | Dmpk    | Kinase   |
| V2LHS_1877   | MAP4K1  | Kinase   |
| V2LHS_188172 | DYRK1B  | Kinase   |
| V2LHS_188466 | ANKK1   | Kinase   |
| V2LHS_189774 | FN3K    | Kinase   |
| V2LHS_19098  |         | 0 Kinase |
| V2LHS_191146 | FGFR1   | Kinase   |
| V2LHS_191807 | CDKN1B  | Kinase   |
| V2LHS_192049 | AKT1    | Kinase   |
| V2LHS_1922   | HIPK3   | Kinase   |
| V2LHS_192793 | PAK6    | Kinase   |
| V2LHS_192880 | ATM     | Kinase   |
| V2LHS_1932   | CHEK2   | Kinase   |
| V2LHS_19368  | PRKX    | Kinase   |

|              |                |        |
|--------------|----------------|--------|
| V2LHS_193688 | ANKK1          | Kinase |
| V2LHS_19369  | PRKX           | Kinase |
| V2LHS_193796 | SIK3           | Kinase |
| V2LHS_194103 | SIK3           | Kinase |
| V2LHS_19417  | MAP2K7         | Kinase |
| V2LHS_194182 | FGFR1          | Kinase |
| V2LHS_194185 | DYRK1B, Dyrk1c | Kinase |
| V2LHS_194190 | CDK10          | Kinase |
| V2LHS_194207 | ANKK1          | Kinase |
| V2LHS_1945   | IRAK3          | Kinase |
| V2LHS_194658 | ANKK1          | Kinase |
| V2LHS_19536  | ACVR1C         | Kinase |
| V2LHS_19539  | ACVR1C         | Kinase |
| V2LHS_1963   | PRKD3          | Kinase |
| V2LHS_196508 | ABL1, BCR      | Kinase |
| V2LHS_196805 | CHEK2          | Kinase |
| V2LHS_196809 | ABL1           | Kinase |
| V2LHS_196812 | BRD2           | Kinase |
| V2LHS_1970   | MAP3K3         | Kinase |
| V2LHS_197050 | COL4A3BP       | Kinase |
| V2LHS_19708  | PLK1           | Kinase |
| V2LHS_197088 | COL4A3BP       | Kinase |
| V2LHS_19709  | PLK1           | Kinase |
| V2LHS_19711  | PLK1           | Kinase |
| V2LHS_197306 | MAP3K12, PCBP2 | Kinase |
| V2LHS_197329 | NEK6           | Kinase |
| V2LHS_197398 | MAK            | Kinase |
| V2LHS_19754  | WNK2           | Kinase |
| V2LHS_197675 | MAK            | Kinase |
| V2LHS_197682 | PAK4           | Kinase |
| V2LHS_197938 | MOK            | Kinase |
| V2LHS_197974 | MAP4K5         | Kinase |
| V2LHS_198054 | MAK            | Kinase |
| V2LHS_198066 | MAP3K4         | Kinase |
| V2LHS_198098 | BCKDK          | Kinase |
| V2LHS_198127 | MAP3K2         | Kinase |
| V2LHS_198158 | COL4A3BP       | Kinase |
| V2LHS_198333 | IRAK3          | Kinase |
| V2LHS_198456 | PIK3R5         | Kinase |
| V2LHS_198489 | TRIO           | Kinase |
| V2LHS_198510 | MAP3K5         | Kinase |
| V2LHS_198530 | PRKD3          | Kinase |
| V2LHS_19863  | PIP4K2A        | Kinase |
| V2LHS_198649 | SPEG           | Kinase |
| V2LHS_198745 | ABL1, BCR      | Kinase |
| V2LHS_198762 | MAP3K2         | Kinase |
| V2LHS_19908  | PIK3R2         | Kinase |

|              |           |        |
|--------------|-----------|--------|
| V2LHS_19910  | PIK3R2    | Kinase |
| V2LHS_19933  | PIK3CD    | Kinase |
| V2LHS_199668 | MERTK     | Kinase |
| V2LHS_19970  | PIK3CD    | Kinase |
| V2LHS_199736 | STK25     | Kinase |
| V2LHS_199919 | PLK4      | Kinase |
| V2LHS_200176 | DUSP21    | Kinase |
| V2LHS_200198 | RPS6KA5   | Kinase |
| V2LHS_200203 | RBKS      | Kinase |
| V2LHS_200259 | PGK2      | Kinase |
| V2LHS_200305 | AKT3      | Kinase |
| V2LHS_200588 | TRIB2     | Kinase |
| V2LHS_200606 | AK7, GAB3 | Kinase |
| V2LHS_200678 | EGFR      | Kinase |
| V2LHS_200726 | RBKS      | Kinase |
| V2LHS_200909 | MYO3B     | Kinase |
| V2LHS_200998 | SPHK1     | Kinase |
| V2LHS_200999 | Trib2     | Kinase |
| V2LHS_201012 | ALPK3     | Kinase |
| V2LHS_201187 | EGFR      | Kinase |
| V2LHS_201299 | PGK2      | Kinase |
| V2LHS_201363 | CSNK1G1   | Kinase |
| V2LHS_20148  | IGF1R     | Kinase |
| V2LHS_201530 | PAK7      | Kinase |
| V2LHS_201567 | EPHA6     | Kinase |
| V2LHS_201569 | MAST3     | Kinase |
| V2LHS_201612 | Map3k7    | Kinase |
| V2LHS_201697 | DYRK4     | Kinase |
| V2LHS_201703 | SIK2      | Kinase |
| V2LHS_201709 | ABL2      | Kinase |
| V2LHS_201713 | Map2k5    | Kinase |
| V2LHS_201716 | MAP3K1    | Kinase |
| V2LHS_201718 | Cdk12     | Kinase |
| V2LHS_201731 | EPHB2     | Kinase |
| V2LHS_201744 | PXK       | Kinase |
| V2LHS_201764 | C9orf96   | Kinase |
| V2LHS_201780 | DCLK3     | Kinase |
| V2LHS_201790 | DCLK3     | Kinase |
| V2LHS_201802 | ABL2      | Kinase |
| V2LHS_201818 | TAOK2     | Kinase |
| V2LHS_201822 | MAPKAPK5  | Kinase |
| V2LHS_201856 | MAP4K4    | Kinase |
| V2LHS_201860 | CIT       | Kinase |
| V2LHS_201871 | MAPKAPK5  | Kinase |
| V2LHS_201881 | MAPKAPK2  | Kinase |
| V2LHS_201904 | TNIK      | Kinase |
| V2LHS_201931 | MAP3K7    | Kinase |

|              |          |        |
|--------------|----------|--------|
| V2LHS_201935 | TTBK2    | Kinase |
| V2LHS_201951 | BRSK2    | Kinase |
| V2LHS_201958 | CDK12    | Kinase |
| V2LHS_201960 | CIT      | Kinase |
| V2LHS_201999 | PDIK1L   | Kinase |
| V2LHS_202014 | STRADA   | Kinase |
| V2LHS_202028 | CDK16    | Kinase |
| V2LHS_202047 | MINK1    | Kinase |
| V2LHS_202065 | PRKY     | Kinase |
| V2LHS_202069 | MAST3    | Kinase |
| V2LHS_202083 | BRSK2    | Kinase |
| V2LHS_202094 | PXK      | Kinase |
| V2LHS_202113 | TNIK     | Kinase |
| V2LHS_202115 | STK36    | Kinase |
| V2LHS_202139 | STK33    | Kinase |
| V2LHS_202160 | NEK8     | Kinase |
| V2LHS_202178 | CDC42BPG | Kinase |
| V2LHS_202180 | IKBKB    | Kinase |
| V2LHS_202199 | SIK2     | Kinase |
| V2LHS_202203 | LMTK3    | Kinase |
| V2LHS_202210 | MAP3K7   | Kinase |
| V2LHS_202245 | NEK8     | Kinase |
| V2LHS_202269 | PEAK1    | Kinase |
| V2LHS_202291 | TAOK2    | Kinase |
| V2LHS_202305 | STK19    | Kinase |
| V2LHS_202316 | KSR1     | Kinase |
| V2LHS_202328 | TNIK     | Kinase |
| V2LHS_202338 | PIK3R4   | Kinase |
| V2LHS_202339 | PEAK1    | Kinase |
| V2LHS_202348 | NEK3     | Kinase |
| V2LHS_202353 | MAP4K4   | Kinase |
| V2LHS_202355 | CDK19    | Kinase |
| V2LHS_202375 | MAST1    | Kinase |
| V2LHS_202412 | PEAK1    | Kinase |
| V2LHS_202455 | STK38L   | Kinase |
| V2LHS_202466 | CDKN2B   | Kinase |
| V2LHS_202469 | CDKN1A   | Kinase |
| V2LHS_202478 | CAMK2G   | Kinase |
| V2LHS_202494 | Zap70    | Kinase |
| V2LHS_202526 | PDIK1L   | Kinase |
| V2LHS_202534 | CDK19    | Kinase |
| V2LHS_202535 | AXL      | Kinase |
| V2LHS_202539 | EIF2AK4  | Kinase |
| V2LHS_202541 | KIAA1804 | Kinase |
| V2LHS_202561 | PXK      | Kinase |
| V2LHS_202579 | TSSK4    | Kinase |
| V2LHS_202607 | KIAA1804 | Kinase |

|              |          |        |
|--------------|----------|--------|
| V2LHS_202608 | TTBK2    | Kinase |
| V2LHS_202640 | MLKL     | Kinase |
| V2LHS_202659 | CAMK2G   | Kinase |
| V2LHS_202680 | CAMKK1   | Kinase |
| V2LHS_202692 | TTBK2    | Kinase |
| V2LHS_202701 | MAPK7    | Kinase |
| V2LHS_202706 | BRSK1    | Kinase |
| V2LHS_202735 | SMG1     | Kinase |
| V2LHS_202752 | CDK12    | Kinase |
| V2LHS_202758 | MAST4    | Kinase |
| V2LHS_202770 | DDR1     | Kinase |
| V2LHS_202781 | MAP4K4   | Kinase |
| V2LHS_202787 | CDKN2C   | Kinase |
| V2LHS_202818 | XRCC6BP1 | Kinase |
| V2LHS_202823 | PRKY     | Kinase |
| V2LHS_202839 | NEK1     | Kinase |
| V2LHS_202887 | CIT      | Kinase |
| V2LHS_202888 | SIK2     | Kinase |
| V2LHS_202904 | SMG1     | Kinase |
| V2LHS_202928 | NIM1     | Kinase |
| V2LHS_202935 | AATK     | Kinase |
| V2LHS_202940 | HIPK1    | Kinase |
| V2LHS_202951 | NEK1     | Kinase |
| V2LHS_202958 | STK38L   | Kinase |
| V2LHS_202959 | PAK7     | Kinase |
| V2LHS_202967 | WNK3     | Kinase |
| V2LHS_202977 | MAP3K9   | Kinase |
| V2LHS_202992 | TSSK4    | Kinase |
| V2LHS_202996 | TAOK1    | Kinase |
| V2LHS_203006 | PIK3R4   | Kinase |
| V2LHS_203014 | DYRK4    | Kinase |
| V2LHS_203033 | SMG1     | Kinase |
| V2LHS_203055 | CDK19    | Kinase |
| V2LHS_203109 | UHMK1    | Kinase |
| V2LHS_203111 | MAP3K1   | Kinase |
| V2LHS_203118 | CDKN1A   | Kinase |
| V2LHS_203134 | DCLK3    | Kinase |
| V2LHS_203143 | PSKH1    | Kinase |
| V2LHS_203144 | DCLK2    | Kinase |
| V2LHS_203147 | MLKL     | Kinase |
| V2LHS_203152 | XRCC6BP1 | Kinase |
| V2LHS_203156 | MAP2K5   | Kinase |
| V2LHS_203175 | ADCK4    | Kinase |
| V2LHS_203200 | CSNK1A1L | Kinase |
| V2LHS_203202 | WNK3     | Kinase |
| V2LHS_203223 | MAP3K1   | Kinase |
| V2LHS_203248 | CDKN2C   | Kinase |



|              |          |        |
|--------------|----------|--------|
| V2LHS_203251 | PAK7     | Kinase |
| V2LHS_203257 | MLKL     | Kinase |
| V2LHS_203280 | SIK2     | Kinase |
| V2LHS_203295 | CAMKK1   | Kinase |
| V2LHS_203341 | SGK223   | Kinase |
| V2LHS_203382 | DSTYK    | Kinase |
| V2LHS_203395 | RET      | Kinase |
| V2LHS_203399 | MAPKAPK5 | Kinase |
| V2LHS_203426 | DCLK3    | Kinase |
| V2LHS_203452 | ULK3     | Kinase |
| V2LHS_203482 | STK36    | Kinase |
| V2LHS_203484 | CDC42BPG | Kinase |
| V2LHS_203529 | CDC42BPG | Kinase |
| V2LHS_203561 | C9orf96  | Kinase |
| V2LHS_203572 | PIK3R4   | Kinase |
| V2LHS_203586 | TSSK4    | Kinase |
| V2LHS_203597 | STYK1    | Kinase |
| V2LHS_205451 | PRKAR1B  | Kinase |
| V2LHS_205604 | DGKH     | Kinase |
| V2LHS_20894  | FLT4     | Kinase |
| V2LHS_212506 | TRIM27   | Kinase |
| V2LHS_212556 | PACSIN1  | Kinase |
| V2LHS_214336 | EIF2AK2  | Kinase |
| V2LHS_215825 | PNKP     | Kinase |
| V2LHS_2162   | MAP4K5   | Kinase |
| V2LHS_217769 | Pacsin1  | Kinase |
| V2LHS_217930 | Mapk8    | Kinase |
| V2LHS_217986 | MAPK1    | Kinase |
| V2LHS_218130 | MAPK9    | Kinase |
| V2LHS_218181 | PRKAR1A  | Kinase |
| V2LHS_218226 | PRKCA    | Kinase |
| V2LHS_218699 | MAP2K1   | Kinase |
| V2LHS_219063 | PFKP     | Kinase |
| V2LHS_219857 | PFKFB1   | Kinase |
| V2LHS_2201   | MAP3K4   | Kinase |
| V2LHS_220372 | DGKK     | Kinase |
| V2LHS_2204   | Map3k5   | Kinase |
| V2LHS_2205   | MAP3K5   | Kinase |
| V2LHS_220512 | PRKACB   | Kinase |
| V2LHS_221210 | TWF1     | Kinase |
| V2LHS_221319 | PI4K2B   | Kinase |
| V2LHS_221738 | CDKL4    | Kinase |
| V2LHS_221747 | PI4KA    | Kinase |
| V2LHS_221840 | PDXK     | Kinase |
| V2LHS_222271 | TPD52L3  | Kinase |
| V2LHS_222846 | PRKCSH   | Kinase |
| V2LHS_222899 | Prkar1a  | Kinase |

|              |              |        |
|--------------|--------------|--------|
| V2LHS_222913 | ULK4         | Kinase |
| V2LHS_223346 | MAP2K1       | Kinase |
| V2LHS_223596 | DSTYK        | Kinase |
| V2LHS_223944 | CMPK1        | Kinase |
| V2LHS_223990 | FRK          | Kinase |
| V2LHS_224076 | EFNB3        | Kinase |
| V2LHS_224395 | CRIM1        | Kinase |
| V2LHS_224550 | HIPK2        | Kinase |
| V2LHS_224879 | DSTYK        | Kinase |
| V2LHS_2250   | SYK          | Kinase |
| V2LHS_225012 | MARK4        | Kinase |
| V2LHS_225895 | ZAK          | Kinase |
| V2LHS_225997 | TAOK3        | Kinase |
| V2LHS_226052 | IP6K2        | Kinase |
| V2LHS_226281 | BMPR2        | Kinase |
| V2LHS_226859 | UCK1         | Kinase |
| V2LHS_228143 | MLKL         | Kinase |
| V2LHS_228990 | PDPK1        | Kinase |
| V2LHS_230370 | CDKN1A       | Kinase |
| V2LHS_231208 | PRKDC        | Kinase |
| V2LHS_231711 | Nuak1        | Kinase |
| V2LHS_232168 | TEX14        | Kinase |
| V2LHS_232235 | STK11        | Kinase |
| V2LHS_232378 | NUCKS1       | Kinase |
| V2LHS_232742 | TEK          | Kinase |
| V2LHS_232918 | NUAK1        | Kinase |
| V2LHS_233106 | ADK          | Kinase |
| V2LHS_233108 | IPPK         | Kinase |
| V2LHS_233271 | ADCK2        | Kinase |
| V2LHS_234020 | ITPKB        | Kinase |
| V2LHS_234767 | TRIB1        | Kinase |
| V2LHS_235462 | ACVR2A       | Kinase |
| V2LHS_235590 | CDK18        | Kinase |
| V2LHS_235668 | PSKH1        | Kinase |
| V2LHS_235718 | CDADC1       | Kinase |
| V2LHS_236766 | AKIP1, NUAK2 | Kinase |
| V2LHS_236956 | ADRBK1       | Kinase |
| V2LHS_237454 | HCK          | Kinase |
| V2LHS_237611 | NEK5         | Kinase |
| V2LHS_237948 | AKT2         | Kinase |
| V2LHS_237994 | ZAK          | Kinase |
| V2LHS_238359 | AXL          | Kinase |
| V2LHS_238806 | SMG1         | Kinase |
| V2LHS_238831 | MAP3K6       | Kinase |
| V2LHS_238906 | PRPF4B       | Kinase |
| V2LHS_238923 | WNK2         | Kinase |
| V2LHS_238927 | COL4A3BP     | Kinase |

|              |              |        |
|--------------|--------------|--------|
| V2LHS_238932 | SCYL3        | Kinase |
| V2LHS_238955 | CAMKK1       | Kinase |
| V2LHS_238966 | RIOK3        | Kinase |
| V2LHS_238988 | MARK2        | Kinase |
| V2LHS_238991 | TTBK1        | Kinase |
| V2LHS_239001 | MINK1        | Kinase |
| V2LHS_239042 | ZAK          | Kinase |
| V2LHS_239070 | UHMK1        | Kinase |
| V2LHS_239083 | COL4A3BP     | Kinase |
| V2LHS_239113 | RIOK3        | Kinase |
| V2LHS_239144 | SCYL3        | Kinase |
| V2LHS_239154 | RIOK3        | Kinase |
| V2LHS_239175 | SCYL3        | Kinase |
| V2LHS_239639 | PDXK         | Kinase |
| V2LHS_2398   | BCKDK        | Kinase |
| V2LHS_239860 | MAP4K3       | Kinase |
| V2LHS_2399   | BCKDK        | Kinase |
| V2LHS_239918 | DTYMK        | Kinase |
| V2LHS_239997 | HIPK4        | Kinase |
| V2LHS_240053 | IPMK         | Kinase |
| V2LHS_240239 | BRAF         | Kinase |
| V2LHS_240995 | ROR1         | Kinase |
| V2LHS_241062 | CDK20        | Kinase |
| V2LHS_241082 | HIPK4        | Kinase |
| V2LHS_241090 | IPMK         | Kinase |
| V2LHS_2413   | PDPK1, PDPK2 | Kinase |
| V2LHS_241402 | RPS6KA1      | Kinase |
| V2LHS_241437 | PLK1         | Kinase |
| V2LHS_241576 | CDK20        | Kinase |
| V2LHS_241668 | RIPK1        | Kinase |
| V2LHS_24212  | Csnk1g3      | Kinase |
| V2LHS_24213  | CSNK1G3      | Kinase |
| V2LHS_24215  | CSNK1G3      | Kinase |
| V2LHS_242196 | CASK         | Kinase |
| V2LHS_242214 | IPMK         | Kinase |
| V2LHS_242401 | BRAF         | Kinase |
| V2LHS_242663 | SKAP1        | Kinase |
| V2LHS_242715 | EPHB1        | Kinase |
| V2LHS_2431   | ICK          | Kinase |
| V2LHS_243560 | TK2          | Kinase |
| V2LHS_24387  | CDK13        | Kinase |
| V2LHS_24388  | CDK13        | Kinase |
| V2LHS_24390  | CDK13        | Kinase |
| V2LHS_24391  | CDK13        | Kinase |
| V2LHS_24392  | CDK13        | Kinase |
| V2LHS_244017 | CRKL         | Kinase |
| V2LHS_244125 | CDK5R1       | Kinase |

|              |          |        |
|--------------|----------|--------|
| V2LHS_244194 | NUP62    | Kinase |
| V2LHS_244383 | Ip6k1    | Kinase |
| V2LHS_245619 | UCK2     | Kinase |
| V2LHS_245624 | HUS1     | Kinase |
| V2LHS_245649 | EFNA4    | Kinase |
| V2LHS_245746 | TK2      | Kinase |
| V2LHS_246159 | ILK      | Kinase |
| V2LHS_246500 | IP6K1    | Kinase |
| V2LHS_246504 | Gtf2h1   | Kinase |
| V2LHS_247253 | RIPK4    | Kinase |
| V2LHS_247642 | PDGFRL   | Kinase |
| V2LHS_247649 | SCYL1    | Kinase |
| V2LHS_247743 | TRIB3    | Kinase |
| V2LHS_248262 | PTK2     | Kinase |
| V2LHS_248408 | Efna3    | Kinase |
| V2LHS_248524 | CDC42BPB | Kinase |
| V2LHS_24861  | CDK20    | Kinase |
| V2LHS_249588 | GUCY2C   | Kinase |
| V2LHS_249917 | DLG2     | Kinase |
| V2LHS_250223 | MOK      | Kinase |
| V2LHS_250513 | STK25    | Kinase |
| V2LHS_251052 | ITPK1    | Kinase |
| V2LHS_252882 | PMVK     | Kinase |
| V2LHS_253236 | ALPK3    | Kinase |
| V2LHS_253397 | PRKAR1B  | Kinase |
| V2LHS_25430  | IRAK2    | Kinase |
| V2LHS_25432  | IRAK2    | Kinase |
| V2LHS_255162 | EIF2AK4  | Kinase |
| V2LHS_255271 | ZAP70    | Kinase |
| V2LHS_256515 | PDXK     | Kinase |
| V2LHS_258334 | PGK1     | Kinase |
| V2LHS_258435 | INSR     | Kinase |
| V2LHS_259460 | GK       | Kinase |
| V2LHS_261809 | MASTL    | Kinase |
| V2LHS_261818 | BMX      | Kinase |
| V2LHS_261831 | FLT3     | Kinase |
| V2LHS_261847 | ACVR2B   | Kinase |
| V2LHS_261889 | HIPK2    | Kinase |
| V2LHS_261898 | ULK4     | Kinase |
| V2LHS_261913 | DAPK3    | Kinase |
| V2LHS_261946 | TAOK1    | Kinase |
| V2LHS_262090 | STK40    | Kinase |
| V2LHS_262100 | MTOR     | Kinase |
| V2LHS_262111 | PRKX     | Kinase |
| V2LHS_262112 | NEK1     | Kinase |
| V2LHS_262129 | MAPK10   | Kinase |
| V2LHS_262130 | DYRK3    | Kinase |

|              |                                                 |        |
|--------------|-------------------------------------------------|--------|
| V2LHS_262147 | TNIK                                            | Kinase |
| V2LHS_262148 | CKS2                                            | Kinase |
| V2LHS_262156 | CDKN2D                                          | Kinase |
| V2LHS_262163 | NEK1                                            | Kinase |
| V2LHS_262250 | TNIK                                            | Kinase |
| V2LHS_262262 | PRKAG1                                          | Kinase |
| V2LHS_262276 | MAP2K7                                          | Kinase |
| V2LHS_262288 | PDK1                                            | Kinase |
| V2LHS_262296 | CDKN2C                                          | Kinase |
| V2LHS_262311 | CDKL5                                           | Kinase |
| V2LHS_262313 | EPHA6                                           | Kinase |
| V2LHS_262328 | PLK1                                            | Kinase |
| V2LHS_262353 | PRKCG                                           | Kinase |
| V2LHS_262468 | BRSK1                                           | Kinase |
| V2LHS_262486 | DSTYK                                           | Kinase |
| V2LHS_262494 | MARK3                                           | Kinase |
| V2LHS_262582 | LYN                                             | Kinase |
| V2LHS_262630 | PRKACB                                          | Kinase |
| V2LHS_262636 | STYK1                                           | Kinase |
| V2LHS_262685 | CLK2, CLK2P                                     | Kinase |
| V2LHS_262700 | DAPK2                                           | Kinase |
| V2LHS_262715 | PRKAG1                                          | Kinase |
| V2LHS_262742 | EIF2AK2                                         | Kinase |
| V2LHS_262745 | MAP2K1                                          | Kinase |
| V2LHS_262746 | DDR1                                            | Kinase |
| V2LHS_262809 | Dclk2                                           | Kinase |
| V2LHS_262840 | ADRBK1                                          | Kinase |
| V2LHS_262926 | FGFR2                                           | Kinase |
| V2LHS_262959 | MAP4K2                                          | Kinase |
| V2LHS_262962 | AGK                                             | Kinase |
| V2LHS_262977 | PRKCI                                           | Kinase |
| V2LHS_262979 | CDKN1B                                          | Kinase |
| V2LHS_263029 | SRPK2                                           | Kinase |
| V2LHS_263076 | PTK7                                            | Kinase |
| V2LHS_263222 | TAB1                                            | Kinase |
| V2LHS_263235 | MAP3K1                                          | Kinase |
| V2LHS_263240 | KALRN                                           | Kinase |
| V2LHS_263294 | BRSK1                                           | Kinase |
| V2LHS_263305 | RIOK2                                           | Kinase |
| V2LHS_263309 | EIF2AK2                                         | Kinase |
| V2LHS_263364 | DDR1                                            | Kinase |
| V2LHS_263378 | MAPKAPK2                                        | Kinase |
| V2LHS_263639 | AK3                                             | Kinase |
| V2LHS_265276 | BOLA2, LOC100271836, LOC440354, LOC595101, SMG1 | Kinase |
| V2LHS_27012  | STK16                                           | Kinase |
| V2LHS_27043  | CASK                                            | Kinase |
| V2LHS_27067  | MKNK1                                           | Kinase |

|              |          |        |
|--------------|----------|--------|
| V2LHS_27071  | MKNK1    | Kinase |
| V2LHS_27072  | MKNK1    | Kinase |
| V2LHS_27119  | PDXK     | Kinase |
| V2LHS_271832 | NRK      | Kinase |
| V2LHS_27293  | MAPKAPK5 | Kinase |
| V2LHS_27295  | MAPKAPK5 | Kinase |
| V2LHS_27423  | Camk1    | Kinase |
| V2LHS_27424  | CAMK1    | Kinase |
| V2LHS_27426  | CAMK1    | Kinase |
| V2LHS_27432  | DGKD     | Kinase |
| V2LHS_27433  | DGKD     | Kinase |
| V2LHS_274865 | PSKH1    | Kinase |
| V2LHS_27519  | IKBKAP   | Kinase |
| V2LHS_27524  | IKBKAP   | Kinase |
| V2LHS_275526 | MAPK10   | Kinase |
| V2LHS_275659 | EXOSC10  | Kinase |
| V2LHS_275787 | MAPK10   | Kinase |
| V2LHS_27605  | IKBKG    | Kinase |
| V2LHS_27736  | PIK3R3   | Kinase |
| V2LHS_27739  | PIK3R3   | Kinase |
| V2LHS_27740  | PIK3R3   | Kinase |
| V2LHS_278143 | LIMK2    | Kinase |
| V2LHS_27888  | MAP4K3   | Kinase |
| V2LHS_27889  | MAP4K3   | Kinase |
| V2LHS_27891  | MAP4K3   | Kinase |
| V2LHS_27979  | CDC42BPA | Kinase |
| V2LHS_28393  | Stk17b   | Kinase |
| V2LHS_28601  | AURKB    | Kinase |
| V2LHS_28602  | AURKB    | Kinase |
| V2LHS_28606  | AURKB    | Kinase |
| V2LHS_28870  | COMMD3   | Kinase |
| V2LHS_28871  | COMMD3   | Kinase |
| V2LHS_29093  | FUK      | Kinase |
| V2LHS_29890  | IPMK     | Kinase |
| V2LHS_30157  | STK32A   | Kinase |
| V2LHS_30754  | MARK1    | Kinase |
| V2LHS_30755  | MARK1    | Kinase |
| V2LHS_30756  | MARK1    | Kinase |
| V2LHS_31109  | ETNK1    | Kinase |
| V2LHS_31111  | ETNK1    | Kinase |
| V2LHS_31598  | PIKFYVE  | Kinase |
| V2LHS_31983  | RYK      | Kinase |
| V2LHS_31986  | RYK      | Kinase |
| V2LHS_32012  | RPS6KA1  | Kinase |
| V2LHS_32013  | RPS6KA1  | Kinase |
| V2LHS_32140  | ROS1     | Kinase |
| V2LHS_32143  | ROS1     | Kinase |

|             |          |        |
|-------------|----------|--------|
| V2LHS_32144 | ROS1     | Kinase |
| V2LHS_32604 | DYRK2    | Kinase |
| V2LHS_32605 | DYRK2    | Kinase |
| V2LHS_32988 | ULK1     | Kinase |
| V2LHS_33057 | ULK1     | Kinase |
| V2LHS_33174 | PIP5K1B  | Kinase |
| V2LHS_33176 | PIP5K1B  | Kinase |
| V2LHS_33177 | PIP5K1B  | Kinase |
| V2LHS_33181 | PIP4K2B  | Kinase |
| V2LHS_33182 | Pip4k2b  | Kinase |
| V2LHS_33273 | NME5     | Kinase |
| V2LHS_33276 | NME5     | Kinase |
| V2LHS_33601 | CDKL1    | Kinase |
| V2LHS_33603 | CDKL1    | Kinase |
| V2LHS_33678 | PIK3R1   | Kinase |
| V2LHS_33679 | PIK3R1   | Kinase |
| V2LHS_35548 | TAOK2    | Kinase |
| V2LHS_35747 | SCYL3    | Kinase |
| V2LHS_35748 | SCYL3    | Kinase |
| V2LHS_35750 | SCYL3    | Kinase |
| V2LHS_35842 | Gsk3a    | Kinase |
| V2LHS_35846 | GSK3A    | Kinase |
| V2LHS_36019 | STK17A   | Kinase |
| V2LHS_36021 | STK17A   | Kinase |
| V2LHS_36022 | STK17A   | Kinase |
| V2LHS_36045 | MAPKAPK2 | Kinase |
| V2LHS_36238 | MAGI1    | Kinase |
| V2LHS_36274 | PRKAB2   | Kinase |
| V2LHS_36276 | PRKAB2   | Kinase |
| V2LHS_36413 | DCLK1    | Kinase |
| V2LHS_36415 | DCLK1    | Kinase |
| V2LHS_36418 | Dclk1    | Kinase |
| V2LHS_36420 | PDK3     | Kinase |
| V2LHS_36423 | PDK3     | Kinase |
| V2LHS_36730 | MAP3K13  | Kinase |
| V2LHS_36733 | MAP3K13  | Kinase |
| V2LHS_36780 | Mpp2     | Kinase |
| V2LHS_36817 | MOS      | Kinase |
| V2LHS_36820 | DGKI     | Kinase |
| V2LHS_36821 | DGKI     | Kinase |
| V2LHS_36825 | Dgki     | Kinase |
| V2LHS_37234 | LCK      | Kinase |
| V2LHS_37751 | Mapk3    | Kinase |
| V2LHS_37925 | PAK7     | Kinase |
| V2LHS_38098 | GTF2H1   | Kinase |
| V2LHS_38106 | PANK1    | Kinase |
| V2LHS_38326 | GRK4     | Kinase |

|             |          |        |
|-------------|----------|--------|
| V2LHS_38327 | GRK4     | Kinase |
| V2LHS_38454 | CAMK1D   | Kinase |
| V2LHS_40119 | SBK1     | Kinase |
| V2LHS_41022 | LATS1    | Kinase |
| V2LHS_41024 | LATS1    | Kinase |
| V2LHS_41025 | LATS1    | Kinase |
| V2LHS_41326 | MAP3K6   | Kinase |
| V2LHS_41798 | MAPKAPK3 | Kinase |
| V2LHS_41799 | MAPKAPK3 | Kinase |
| V2LHS_41801 | MAPKAPK3 | Kinase |
| V2LHS_41802 | MAPKAPK3 | Kinase |
| V2LHS_41897 | BRD4     | Kinase |
| V2LHS_41898 | BRD4     | Kinase |
| V2LHS_42386 | TGFBR1   | Kinase |
| V2LHS_42670 | TAF1     | Kinase |
| V2LHS_42846 | Uck2     | Kinase |
| V2LHS_42886 | GAK      | Kinase |
| V2LHS_42888 | GAK      | Kinase |
| V2LHS_42891 | GAK      | Kinase |
| V2LHS_43109 | FER      | Kinase |
| V2LHS_43326 | ERBB4    | Kinase |
| V2LHS_43327 | ERBB4    | Kinase |
| V2LHS_43328 | ERBB4    | Kinase |
| V2LHS_43329 | ERBB4    | Kinase |
| V2LHS_43354 | EPHA1    | Kinase |
| V2LHS_43357 | EPHA1    | Kinase |
| V2LHS_43360 | EPHA3    | Kinase |
| V2LHS_43730 | CSF1R    | Kinase |
| V2LHS_43734 | CSF1R    | Kinase |
| V2LHS_43735 | CSF1R    | Kinase |
| V2LHS_43899 | CRKL     | Kinase |
| V2LHS_43900 | Crkl     | Kinase |
| V2LHS_43908 | RPS6KC1  | Kinase |
| V2LHS_43911 | RPS6KC1  | Kinase |
| V2LHS_43931 | MAP3K8   | Kinase |
| V2LHS_43933 | MAP3K8   | Kinase |
| V2LHS_43934 | MAP3K8   | Kinase |
| V2LHS_45409 | NRBP2    | Kinase |
| V2LHS_45410 | NRBP2    | Kinase |
| V2LHS_45411 | NRBP2    | Kinase |
| V2LHS_46934 | RPS6KB2  | Kinase |
| V2LHS_46938 | RPS6KB2  | Kinase |
| V2LHS_46947 | MAP3K14  | Kinase |
| V2LHS_46992 | KALRN    | Kinase |
| V2LHS_47000 | CDKL2    | Kinase |
| V2LHS_47001 | CDKL2    | Kinase |
| V2LHS_47002 | CDKL2    | Kinase |



|             |         |        |
|-------------|---------|--------|
| V2LHS_47250 | MAPK1   | Kinase |
| V2LHS_47254 | MAPK1   | Kinase |
| V2LHS_47379 | RPS6KA3 | Kinase |
| V2LHS_47380 | RPS6KA3 | Kinase |
| V2LHS_47382 | RPS6KA3 | Kinase |
| V2LHS_47383 | RPS6KA3 | Kinase |
| V2LHS_47609 | MAP4K2  | Kinase |
| V2LHS_47787 | PRPF4B  | Kinase |
| V2LHS_47788 | PRPF4B  | Kinase |
| V2LHS_47795 | PIK3C2G | Kinase |
| V2LHS_47796 | PIK3C2G | Kinase |
| V2LHS_47820 | PFKFB3  | Kinase |
| V2LHS_47823 | PFKFB3  | Kinase |
| V2LHS_47824 | PFKFB4  | Kinase |
| V2LHS_47827 | PFKFB4  | Kinase |
| V2LHS_47872 | CPNE3   | Kinase |
| V2LHS_47948 | ROR2    | Kinase |
| V2LHS_47949 | ROR2    | Kinase |
| V2LHS_48445 | Calm3   | Kinase |
| V2LHS_48446 | CALM3   | Kinase |
| V2LHS_48449 | CALM3   | Kinase |
| V2LHS_48629 | CDK14   | Kinase |
| V2LHS_48630 | CDK14   | Kinase |
| V2LHS_48954 | HUS1    | Kinase |
| V2LHS_48955 | HUS1    | Kinase |
| V2LHS_48958 | HUS1    | Kinase |
| V2LHS_49036 | ADRBK2  | Kinase |
| V2LHS_49235 | ABL2    | Kinase |
| V2LHS_49239 | ABL2    | Kinase |
| V2LHS_49900 | NUP62   | Kinase |
| V2LHS_50273 | GOLGA5  | Kinase |
| V2LHS_50274 | GOLGA5  | Kinase |
| V2LHS_50448 | XYLB    | Kinase |
| V2LHS_50465 | OXSR1   | Kinase |
| V2LHS_50467 | Oxsr1   | Kinase |
| V2LHS_50468 | OXSR1   | Kinase |
| V2LHS_51202 | MAGI2   | Kinase |
| V2LHS_51380 | WNK1    | Kinase |
| V2LHS_53107 | CDK5R1  | Kinase |
| V2LHS_55961 | TGFBR1  | Kinase |
| V2LHS_55964 | TGFBR1  | Kinase |
| V2LHS_56404 | VRK2    | Kinase |
| V2LHS_56405 | Vrk2    | Kinase |
| V2LHS_56438 | TYRO3   | Kinase |
| V2LHS_56442 | TYRO3   | Kinase |
| V2LHS_56671 | TESK1   | Kinase |
| V2LHS_56674 | TESK1   | Kinase |

|             |        |        |
|-------------|--------|--------|
| V2LHS_56676 | TESK1  | Kinase |
| V2LHS_56690 | STK4   | Kinase |
| V2LHS_56692 | STK4   | Kinase |
| V2LHS_56704 | SGK1   | Kinase |
| V2LHS_56727 | STK4   | Kinase |
| V2LHS_56745 | STK3   | Kinase |
| V2LHS_56747 | STK3   | Kinase |
| V2LHS_56749 | STK3   | Kinase |
| V2LHS_56763 | STK4   | Kinase |
| V2LHS_57326 | PTK2   | Kinase |
| V2LHS_57562 | PRKCQ  | Kinase |
| V2LHS_57563 | PRKCQ  | Kinase |
| V2LHS_57566 | PRKCQ  | Kinase |
| V2LHS_57567 | PRKCQ  | Kinase |
| V2LHS_57588 | PRKG2  | Kinase |
| V2LHS_57590 | PRKG2  | Kinase |
| V2LHS_57599 | Prkch  | Kinase |
| V2LHS_57616 | PKN2   | Kinase |
| V2LHS_57636 | PRKCH  | Kinase |
| V2LHS_57638 | PRKAA2 | Kinase |
| V2LHS_57639 | PRKAA2 | Kinase |
| V2LHS_57641 | PRKAA2 | Kinase |
| V2LHS_57645 | PRKAB1 | Kinase |
| V2LHS_57647 | PRKAB1 | Kinase |
| V2LHS_57654 | PRKCD  | Kinase |
| V2LHS_57658 | PRKCD  | Kinase |
| V2LHS_57674 | Prkaa2 | Kinase |
| V2LHS_57694 | PRKAA1 | Kinase |
| V2LHS_57699 | PRKAA1 | Kinase |
| V2LHS_57900 | SCYL1  | Kinase |
| V2LHS_5794  | CIB2   | Kinase |
| V2LHS_58228 | CLK4   | Kinase |
| V2LHS_58229 | CLK4   | Kinase |
| V2LHS_58230 | CLK4   | Kinase |
| V2LHS_58233 | CLK4   | Kinase |
| V2LHS_58606 | SRMS   | Kinase |
| V2LHS_58667 | Pfkfb2 | Kinase |
| V2LHS_58678 | PHKG1  | Kinase |
| V2LHS_58679 | PHKG1  | Kinase |
| V2LHS_58888 | GRK7   | Kinase |
| V2LHS_58889 | GRK7   | Kinase |
| V2LHS_58979 | PDGFRA | Kinase |
| V2LHS_58980 | PDGFRA | Kinase |
| V2LHS_58981 | Pdgfra | Kinase |
| V2LHS_59072 | CDK16  | Kinase |
| V2LHS_59159 | RIPK4  | Kinase |
| V2LHS_59298 | AK4    | Kinase |

|             |                                    |        |
|-------------|------------------------------------|--------|
| V2LHS_59300 | AK4                                | Kinase |
| V2LHS_59892 | TAOK1                              | Kinase |
| V2LHS_60480 | PIK3R4                             | Kinase |
| V2LHS_60490 | SMG1                               | Kinase |
| V2LHS_60491 | LOC440354, LOC595101, SMG1, SMG1P1 | Kinase |
| V2LHS_60529 | IKBKE                              | Kinase |
| V2LHS_60532 | IKBKE                              | Kinase |
| V2LHS_61648 | JAK2                               | Kinase |
| V2LHS_61653 | JAK2                               | Kinase |
| V2LHS_61802 | GUCY2C                             | Kinase |
| V2LHS_61866 | MTOR                               | Kinase |
| V2LHS_61896 | EFNA3                              | Kinase |
| V2LHS_62038 | MAST1                              | Kinase |
| V2LHS_62084 | DAPK1                              | Kinase |
| V2LHS_62089 | DAPK1                              | Kinase |
| V2LHS_62123 | MUSK                               | Kinase |
| V2LHS_62188 | CDK5                               | Kinase |
| V2LHS_63241 | ITK                                | Kinase |
| V2LHS_63242 | ITK                                | Kinase |
| V2LHS_63243 | ITK                                | Kinase |
| V2LHS_63244 | ITK                                | Kinase |
| V2LHS_63245 | ITK                                | Kinase |
| V2LHS_63527 | KIAA1804                           | Kinase |
| V2LHS_63564 | KIAA1804                           | Kinase |
| V2LHS_63729 | NTRK2                              | Kinase |
| V2LHS_63731 | NTRK2                              | Kinase |
| V2LHS_63734 | NTRK2                              | Kinase |
| V2LHS_63971 | Nrbp, NRBP1                        | Kinase |
| V2LHS_63972 | NRBP1                              | Kinase |
| V2LHS_64494 | CDK15                              | Kinase |
| V2LHS_64495 | CDK15                              | Kinase |
| V2LHS_64496 | CDK15                              | Kinase |
| V2LHS_64497 | CDK15                              | Kinase |
| V2LHS_64866 | PKN3                               | Kinase |
| V2LHS_64867 | PKN3                               | Kinase |
| V2LHS_65365 | NME7                               | Kinase |
| V2LHS_65366 | NME7                               | Kinase |
| V2LHS_65367 | NME7                               | Kinase |
| V2LHS_65370 | NME7                               | Kinase |
| V2LHS_65428 | AMHR2                              | Kinase |
| V2LHS_65862 | BCR, BCRP3                         | Kinase |
| V2LHS_65935 | EPHA8                              | Kinase |
| V2LHS_66025 | EEF2K                              | Kinase |
| V2LHS_66315 | TRIB3                              | Kinase |
| V2LHS_66656 | RNASEL                             | Kinase |
| V2LHS_66667 | RPS6KA2                            | Kinase |
| V2LHS_66854 | DLG3                               | Kinase |

|             |                  |        |
|-------------|------------------|--------|
| V2LHS_671   | CSNK1G1          | Kinase |
| V2LHS_67948 | ROCK2            | Kinase |
| V2LHS_68173 | EIF2AK3          | Kinase |
| V2LHS_68177 | Eif2ak3          | Kinase |
| V2LHS_68219 | MAP4K4           | Kinase |
| V2LHS_68613 | GNE              | Kinase |
| V2LHS_68622 | TJP2             | Kinase |
| V2LHS_68872 | AKT3             | Kinase |
| V2LHS_68897 | PKDCC            | Kinase |
| V2LHS_69297 | PAPSS1           | Kinase |
| V2LHS_69371 | PAPSS1           | Kinase |
| V2LHS_69601 | YES1             | Kinase |
| V2LHS_69602 | YES1             | Kinase |
| V2LHS_69603 | YES1             | Kinase |
| V2LHS_69605 | YES1             | Kinase |
| V2LHS_70606 | ROCK1, ROCK1P1   | Kinase |
| V2LHS_70609 | ROCK1            | Kinase |
| V2LHS_70726 | PRKCE            | Kinase |
| V2LHS_70832 | SHPK, TRPV1      | Kinase |
| V2LHS_70835 | SHPK             | Kinase |
| V2LHS_71286 | Sgk3             | Kinase |
| V2LHS_71287 | SGK3             | Kinase |
| V2LHS_71288 | SGK3             | Kinase |
| V2LHS_71289 | SGK3             | Kinase |
| V2LHS_71309 | CDC42BPB         | Kinase |
| V2LHS_71311 | CDC42BPB         | Kinase |
| V2LHS_71312 | CDC42BPB         | Kinase |
| V2LHS_71313 | CDC42BPB         | Kinase |
| V2LHS_71333 | TBK1             | Kinase |
| V2LHS_71334 | TBK1             | Kinase |
| V2LHS_71618 | MAPK15           | Kinase |
| V2LHS_71619 | MAPK15           | Kinase |
| V2LHS_71621 | MAPK15           | Kinase |
| V2LHS_71809 | STK39            | Kinase |
| V2LHS_71810 | STK39            | Kinase |
| V2LHS_71811 | STK39            | Kinase |
| V2LHS_71812 | STK39            | Kinase |
| V2LHS_72249 | CAMK1G           | Kinase |
| V2LHS_72250 | CAMK1G           | Kinase |
| V2LHS_73518 | SLK              | Kinase |
| V2LHS_74077 | FGFRL1           | Kinase |
| V2LHS_75400 | PKLR             | Kinase |
| V2LHS_75427 | PHKA2            | Kinase |
| V2LHS_75431 | PHKA2            | Kinase |
| V2LHS_75441 | PHKB             | Kinase |
| V2LHS_75456 | PHKG2            | Kinase |
| V2LHS_75488 | PGK1, RGD1560402 | Kinase |

|             |          |        |
|-------------|----------|--------|
| V2LHS_75582 | PFKM     | Kinase |
| V2LHS_76045 | NME1     | Kinase |
| V2LHS_76050 | NME1     | Kinase |
| V2LHS_763   | RBKS     | Kinase |
| V2LHS_76542 | MET      | Kinase |
| V2LHS_76544 | MET      | Kinase |
| V2LHS_76746 | Kcnh2    | Kinase |
| V2LHS_76943 | KHK      | Kinase |
| V2LHS_76969 | KIT      | Kinase |
| V2LHS_76970 | KIT      | Kinase |
| V2LHS_76971 | Kdr, KIT | Kinase |
| V2LHS_76974 | KIT      | Kinase |
| V2LHS_77136 | CDK19    | Kinase |
| V2LHS_77246 | INSR     | Kinase |
| V2LHS_77581 | PIM2     | Kinase |
| V2LHS_77679 | RIPK3    | Kinase |
| V2LHS_77937 | TLK2     | Kinase |
| V2LHS_78529 | PKIA     | Kinase |
| V2LHS_78857 | ULK2     | Kinase |
| V2LHS_78858 | ULK2     | Kinase |
| V2LHS_78859 | ULK2     | Kinase |
| V2LHS_79317 | ZAP70    | Kinase |
| V2LHS_81432 | LMBR1    | Kinase |
| V2LHS_81433 | LMBR1    | Kinase |
| V2LHS_820   | PIM3     | Kinase |
| V2LHS_82518 | HK1      | Kinase |
| V2LHS_82524 | HK2      | Kinase |
| V2LHS_82525 | HK2      | Kinase |
| V2LHS_82529 | HK2      | Kinase |
| V2LHS_82623 | GUCY2D   | Kinase |
| V2LHS_82956 | GK       | Kinase |
| V2LHS_83314 | NEK3     | Kinase |
| V2LHS_83386 | NADK     | Kinase |
| V2LHS_83390 | NADK     | Kinase |
| V2LHS_83489 | FGFR3    | Kinase |
| V2LHS_83493 | FGFR3    | Kinase |
| V2LHS_83508 | FXN      | Kinase |
| V2LHS_84432 | DDR1     | Kinase |
| V2LHS_84433 | DDR1     | Kinase |
| V2LHS_85493 | DBF4     | Kinase |
| V2LHS_85542 | BRD3     | Kinase |
| V2LHS_85545 | BRD3     | Kinase |
| V2LHS_85617 | FASTK    | Kinase |
| V2LHS_85662 | HUNK     | Kinase |
| V2LHS_85663 | HUNK     | Kinase |
| V2LHS_85664 | HUNK     | Kinase |
| V2LHS_86036 | LATS2    | Kinase |

|             |          |        |
|-------------|----------|--------|
| V2LHS_864   | MAPK10   | Kinase |
| V2LHS_87042 | TSKS     | Kinase |
| V2LHS_87125 | PRKCA    | Kinase |
| V2LHS_87444 | PASK     | Kinase |
| V2LHS_87445 | PASK     | Kinase |
| V2LHS_88027 | MAST2    | Kinase |
| V2LHS_88826 | CDK4     | Kinase |
| V2LHS_88828 | CDK4     | Kinase |
| V2LHS_88951 | MYLK     | Kinase |
| V2LHS_88953 | MYLK     | Kinase |
| V2LHS_88978 | MYLK4    | Kinase |
| V2LHS_89194 | BTK      | Kinase |
| V2LHS_89366 | ATM      | Kinase |
| V2LHS_89368 | ATM      | Kinase |
| V2LHS_89374 | TSSK2    | Kinase |
| V2LHS_89921 | ACVRL1   | Kinase |
| V2LHS_903   | MAP2K5   | Kinase |
| V2LHS_90829 | WNK2     | Kinase |
| V2LHS_90833 | WNK2     | Kinase |
| V2LHS_91309 | PLK2     | Kinase |
| V2LHS_91338 | ACVRL1   | Kinase |
| V2LHS_91514 | STK38    | Kinase |
| V2LHS_91517 | STK38    | Kinase |
| V2LHS_91772 | CASK     | Kinase |
| V2LHS_91774 | CASK     | Kinase |
| V2LHS_92993 | MVK      | Kinase |
| V2LHS_93140 | STK11    | Kinase |
| V2LHS_93160 | TEK      | Kinase |
| V2LHS_93212 | AK1      | Kinase |
| V2LHS_94267 | ACVR1    | Kinase |
| V2LHS_94273 | Acvr2b   | Kinase |
| V2LHS_94361 | Adk      | Kinase |
| V2LHS_94659 | ATR      | Kinase |
| V2LHS_94661 | Atr      | Kinase |
| V2LHS_94774 | PRKDC    | Kinase |
| V2LHS_94971 | SRP72    | Kinase |
| V2LHS_94974 | SRP72    | Kinase |
| V2LHS_95407 | MELK     | Kinase |
| V2LHS_95409 | MELK     | Kinase |
| V2LHS_95410 | MELK     | Kinase |
| V2LHS_95411 | MELK     | Kinase |
| V2LHS_95563 | CDC42BPA | Kinase |
| V2LHS_95638 | NUAK1    | Kinase |
| V2LHS_96016 | AAK1     | Kinase |
| V2LHS_96061 | ICK      | Kinase |
| V2LHS_96062 | ICK      | Kinase |
| V2LHS_96066 | ICK      | Kinase |

|              |        |        |
|--------------|--------|--------|
| V2LHS_97682  | IRAK4  | Kinase |
| V2LHS_97685  | IRAK4  | Kinase |
| V2LHS_97974  | PRKAG2 | Kinase |
| V2LHS_98065  | RELA   | Kinase |
| V2LHS_98066  | RELA   | Kinase |
| V2LHS_98229  | NUCKS1 | Kinase |
| V2LHS_98232  | NUCKS1 | Kinase |
| V2LHS_98271  | Hipk2  | Kinase |
| V2LHS_98272  | HIPK2  | Kinase |
| V2LHS_98358  | IPPK   | Kinase |
| V2LHS_98419  | CERK   | Kinase |
| V2LHS_98421  | CERK   | Kinase |
| V2LHS_98424  | CERK   | Kinase |
| V2LHS_98761  | CAMKV  | Kinase |
| V2LHS_98766  | CAMKV  | Kinase |
| V2LHS_98860  | PRKCH  | Kinase |
| V2LHS_99293  | PDPK1  | Kinase |
| V2LHS_99386  | ADPGK  | Kinase |
| V2LHS_99387  | ADPGK  | Kinase |
| V2LHS_99388  | ADPGK  | Kinase |
| V2LHS_99516  | TSSK3  | Kinase |
| V2LHS_99973  | Nek7   | Kinase |
| V2LHS_99974  | NEK7   | Kinase |
| V3LHS_300064 | HK3    | Kinase |
| V3LHS_300065 | HK3    | Kinase |
| V3LHS_300066 | HK3    | Kinase |
| V3LHS_300067 | HK3    | Kinase |
| V3LHS_300068 | HK3    | Kinase |
| V3LHS_300069 | HK3    | Kinase |
| V3LHS_300422 | Rela   | Kinase |
| V3LHS_300538 | STK10  | Kinase |
| V3LHS_300587 | PRKAG1 | Kinase |
| V3LHS_300589 | Prkag1 | Kinase |
| V3LHS_300888 | WNK3   | Kinase |
| V3LHS_300889 | WNK3   | Kinase |
| V3LHS_300890 | WNK3   | Kinase |
| V3LHS_300891 | WNK3   | Kinase |
| V3LHS_300893 | WNK3   | Kinase |
| V3LHS_301102 | SRMS   | Kinase |
| V3LHS_301103 | SRMS   | Kinase |
| V3LHS_301541 | SPHK1  | Kinase |
| V3LHS_301543 | SPHK1  | Kinase |
| V3LHS_301544 | SPHK1  | Kinase |
| V3LHS_302121 | ETNK1  | Kinase |
| V3LHS_302174 | FLT1   | Kinase |
| V3LHS_302176 | FLT1   | Kinase |
| V3LHS_302177 | FLT1   | Kinase |

|              |                 |        |
|--------------|-----------------|--------|
| V3LHS_302179 | FLT1            | Kinase |
| V3LHS_302214 | CSNK1A1L        | Kinase |
| V3LHS_302215 | CSNK1A1L        | Kinase |
| V3LHS_302225 | ATR             | Kinase |
| V3LHS_302573 | PIK3R5          | Kinase |
| V3LHS_302575 | PIK3R5          | Kinase |
| V3LHS_302576 | PIK3R5          | Kinase |
| V3LHS_302577 | PIK3R5          | Kinase |
| V3LHS_302617 | CRKL            | Kinase |
| V3LHS_302618 | CRKL            | Kinase |
| V3LHS_302620 | CRKL            | Kinase |
| V3LHS_302636 | THNSL1          | Kinase |
| V3LHS_302638 | THNSL1          | Kinase |
| V3LHS_302639 | THNSL1          | Kinase |
| V3LHS_302640 | THNSL1          | Kinase |
| V3LHS_302716 | PRKD3           | Kinase |
| V3LHS_302718 | PRKD3           | Kinase |
| V3LHS_302719 | PRKD3           | Kinase |
| V3LHS_302720 | Prkd3           | Kinase |
| V3LHS_302774 | EPHB3           | Kinase |
| V3LHS_302776 | EPHB3           | Kinase |
| V3LHS_303250 | ADCK4           | Kinase |
| V3LHS_303254 | ADCK4           | Kinase |
| V3LHS_303255 | ADCK4           | Kinase |
| V3LHS_303374 | ABL1            | Kinase |
| V3LHS_303375 | ABL1, BCR, ETV6 | Kinase |
| V3LHS_303402 | JAK1            | Kinase |
| V3LHS_303404 | JAK1            | Kinase |
| V3LHS_303537 | RAF1            | Kinase |
| V3LHS_303538 | RAF1, RAP1A     | Kinase |
| V3LHS_303542 | RAF1, RAP1A     | Kinase |
| V3LHS_303630 | MKNK2           | Kinase |
| V3LHS_303694 | UCKL1           | Kinase |
| V3LHS_303980 | PGK1            | Kinase |
| V3LHS_303981 | PGK1            | Kinase |
| V3LHS_303983 | PGK1            | Kinase |
| V3LHS_303984 | PGK1            | Kinase |
| V3LHS_304082 | COASY           | Kinase |
| V3LHS_304083 | COASY           | Kinase |
| V3LHS_304084 | COASY           | Kinase |
| V3LHS_304085 | COASY           | Kinase |
| V3LHS_304125 | Dstyk           | Kinase |
| V3LHS_304127 | DSTYK           | Kinase |
| V3LHS_304129 | DSTYK           | Kinase |
| V3LHS_304130 | Dstyk           | Kinase |
| V3LHS_304151 | ACVR1C          | Kinase |
| V3LHS_304166 | PIK3R4          | Kinase |



|              |                 |        |
|--------------|-----------------|--------|
| V3LHS_304168 | PIK3R4          | Kinase |
| V3LHS_304635 | EXOSC10         | Kinase |
| V3LHS_304636 | EXOSC10         | Kinase |
| V3LHS_304637 | EXOSC10         | Kinase |
| V3LHS_304640 | EXOSC10         | Kinase |
| V3LHS_304742 | PIK3R2          | Kinase |
| V3LHS_304743 | PIK3R2          | Kinase |
| V3LHS_304744 | PIK3R2          | Kinase |
| V3LHS_304745 | PIK3R2          | Kinase |
| V3LHS_304746 | PIK3R2          | Kinase |
| V3LHS_304766 | ROS1            | Kinase |
| V3LHS_304767 | ROS1            | Kinase |
| V3LHS_304806 | Pank2           | Kinase |
| V3LHS_305144 | EPHA10          | Kinase |
| V3LHS_305148 | Epha10          | Kinase |
| V3LHS_305174 | AK2, RGD1562178 | Kinase |
| V3LHS_305176 | AK2             | Kinase |
| V3LHS_305178 | AK2             | Kinase |
| V3LHS_305179 | AK2             | Kinase |
| V3LHS_305273 | PLK2            | Kinase |
| V3LHS_305276 | PLK2            | Kinase |
| V3LHS_305650 | MAPK13          | Kinase |
| V3LHS_305651 | MAPK13          | Kinase |
| V3LHS_305666 | IGF2R           | Kinase |
| V3LHS_305667 | IGF2R           | Kinase |
| V3LHS_305669 | IGF2R           | Kinase |
| V3LHS_305739 | CSNK2B          | Kinase |
| V3LHS_305740 | CSNK2B          | Kinase |
| V3LHS_305741 | CSNK2B          | Kinase |
| V3LHS_305742 | CSNK2B          | Kinase |
| V3LHS_305780 | Tgfbr1          | Kinase |
| V3LHS_305782 | TGFBR1          | Kinase |
| V3LHS_305784 | TGFBR1          | Kinase |
| V3LHS_305815 | MOS             | Kinase |
| V3LHS_306040 | STK32B          | Kinase |
| V3LHS_306041 | STK32B          | Kinase |
| V3LHS_306042 | STK32B          | Kinase |
| V3LHS_306043 | Stk32b          | Kinase |
| V3LHS_306189 | MPP1            | Kinase |
| V3LHS_306190 | Mpp1            | Kinase |
| V3LHS_306191 | MPP1            | Kinase |
| V3LHS_306714 | ROR1            | Kinase |
| V3LHS_306779 | SRPK3           | Kinase |
| V3LHS_306824 | CDK11A, CDK11B  | Kinase |
| V3LHS_306857 | TEK             | Kinase |
| V3LHS_306858 | TEK             | Kinase |
| V3LHS_306859 | TEK             | Kinase |

|              |         |        |
|--------------|---------|--------|
| V3LHS_306895 | Lmbr1   | Kinase |
| V3LHS_306896 | LMBR1   | Kinase |
| V3LHS_306897 | LMBR1   | Kinase |
| V3LHS_307065 | CDK3    | Kinase |
| V3LHS_307088 | MAP3K15 | Kinase |
| V3LHS_307223 | PFKP    | Kinase |
| V3LHS_307224 | PFKP    | Kinase |
| V3LHS_307225 | PFKP    | Kinase |
| V3LHS_307227 | PFKP    | Kinase |
| V3LHS_307302 | PRKACG  | Kinase |
| V3LHS_307303 | PRKACG  | Kinase |
| V3LHS_307304 | PRKACG  | Kinase |
| V3LHS_307306 | PRKACG  | Kinase |
| V3LHS_307364 | PIP4K2B | Kinase |
| V3LHS_307568 | CDK13   | Kinase |
| V3LHS_307594 | CAMKK1  | Kinase |
| V3LHS_307597 | CAMKK1  | Kinase |
| V3LHS_307598 | CAMKK1  | Kinase |
| V3LHS_307690 | CDKL4   | Kinase |
| V3LHS_307692 | CDKL4   | Kinase |
| V3LHS_307695 | CDKL4   | Kinase |
| V3LHS_307912 | PFKFB1  | Kinase |
| V3LHS_307914 | PFKFB1  | Kinase |
| V3LHS_308063 | NUAK1   | Kinase |
| V3LHS_308292 | ABL2    | Kinase |
| V3LHS_308293 | ABL2    | Kinase |
| V3LHS_308296 | ABL2    | Kinase |
| V3LHS_308571 | PI4KA   | Kinase |
| V3LHS_308572 | PI4KA   | Kinase |
| V3LHS_308573 | PI4KA   | Kinase |
| V3LHS_308643 | TSSK6   | Kinase |
| V3LHS_308672 | MAPK3   | Kinase |
| V3LHS_308859 | DGKG    | Kinase |
| V3LHS_308860 | DGKG    | Kinase |
| V3LHS_308861 | Dgkg    | Kinase |
| V3LHS_308863 | DGKG    | Kinase |
| V3LHS_309038 | GSK3B   | Kinase |
| V3LHS_309039 | GSK3B   | Kinase |
| V3LHS_309040 | GSK3B   | Kinase |
| V3LHS_309142 | PIP4K2A | Kinase |
| V3LHS_309143 | PIP4K2A | Kinase |
| V3LHS_309144 | PIP4K2A | Kinase |
| V3LHS_309145 | PIP4K2A | Kinase |
| V3LHS_309146 | PIP4K2A | Kinase |
| V3LHS_309153 | RBKS    | Kinase |
| V3LHS_309154 | RBKS    | Kinase |
| V3LHS_309157 | Rbks    | Kinase |

|              |                     |        |
|--------------|---------------------|--------|
| V3LHS_309990 | EPHA8               | Kinase |
| V3LHS_309992 | EPHA8               | Kinase |
| V3LHS_309993 | Epha6, Epha8        | Kinase |
| V3LHS_310018 | CAMK2A              | Kinase |
| V3LHS_310117 | Pi4k2a              | Kinase |
| V3LHS_310118 | PI4K2A              | Kinase |
| V3LHS_310122 | PI4K2A              | Kinase |
| V3LHS_310261 | Stk36               | Kinase |
| V3LHS_310385 | CDKN2D              | Kinase |
| V3LHS_310386 | CDKN2D              | Kinase |
| V3LHS_310387 | CDKN2D              | Kinase |
| V3LHS_310389 | CDKN2D              | Kinase |
| V3LHS_310443 | PRKCH               | Kinase |
| V3LHS_310445 | PRKCH               | Kinase |
| V3LHS_310446 | PRKCH               | Kinase |
| V3LHS_310490 | ERBB3               | Kinase |
| V3LHS_310491 | ERBB3               | Kinase |
| V3LHS_310492 | ERBB3               | Kinase |
| V3LHS_310655 | Nek7                | Kinase |
| V3LHS_310656 | NEK7                | Kinase |
| V3LHS_310657 | NEK7                | Kinase |
| V3LHS_310658 | NEK7                | Kinase |
| V3LHS_310898 | CDK16               | Kinase |
| V3LHS_311274 | Cdk5r1              | Kinase |
| V3LHS_311275 | Cdk5r1              | Kinase |
| V3LHS_311346 | Ckb                 | Kinase |
| V3LHS_311459 | PLK1                | Kinase |
| V3LHS_311462 | PLK1                | Kinase |
| V3LHS_311463 | PLK1                | Kinase |
| V3LHS_311583 | Mpp2                | Kinase |
| V3LHS_311697 | ERN1                | Kinase |
| V3LHS_311698 | ERN1                | Kinase |
| V3LHS_312001 | MAP3K11             | Kinase |
| V3LHS_312004 | MAP3K11             | Kinase |
| V3LHS_312500 | CAMK2D              | Kinase |
| V3LHS_312503 | CAMK2D              | Kinase |
| V3LHS_312504 | CAMK2D              | Kinase |
| V3LHS_312661 | MTOR                | Kinase |
| V3LHS_312664 | MTOR                | Kinase |
| V3LHS_312918 | Csf1r               | Kinase |
| V3LHS_312920 | CSF1R               | Kinase |
| V3LHS_312921 | CSF1R               | Kinase |
| V3LHS_312922 | CSF1R               | Kinase |
| V3LHS_312923 | CSF1R               | Kinase |
| V3LHS_312940 | COMMD3, COMMD3-BMI1 | Kinase |
| V3LHS_312941 | COMMD3, COMMD3-BMI1 | Kinase |
| V3LHS_312942 | COMMD3, COMMD3-BMI1 | Kinase |

|              |                     |        |
|--------------|---------------------|--------|
| V3LHS_312943 | COMMD3, COMMD3-BMI1 | Kinase |
| V3LHS_312944 | COMMD3, COMMD3-BMI1 | Kinase |
| V3LHS_312966 | PKMYT1              | Kinase |
| V3LHS_313110 | CALM3               | Kinase |
| V3LHS_313112 | CALM3               | Kinase |
| V3LHS_313389 | PSKH2               | Kinase |
| V3LHS_313392 | PSKH2               | Kinase |
| V3LHS_313655 | MAST4               | Kinase |
| V3LHS_313656 | MAST4               | Kinase |
| V3LHS_313657 | MAST4               | Kinase |
| V3LHS_313658 | MAST4               | Kinase |
| V3LHS_313716 | RIOK2               | Kinase |
| V3LHS_313719 | RIOK2               | Kinase |
| V3LHS_314001 | CDK11B              | Kinase |
| V3LHS_314002 | CDK11A, CDK11B      | Kinase |
| V3LHS_314003 | CDK11A, CDK11B      | Kinase |
| V3LHS_314418 | RIPK2               | Kinase |
| V3LHS_314947 | MPP3                | Kinase |
| V3LHS_314951 | MPP3                | Kinase |
| V3LHS_315390 | GK2                 | Kinase |
| V3LHS_315391 | GK2                 | Kinase |
| V3LHS_315392 | GK2                 | Kinase |
| V3LHS_315393 | GK2                 | Kinase |
| V3LHS_315551 | TAOK2               | Kinase |
| V3LHS_315629 | PAK2                | Kinase |
| V3LHS_315630 | PAK2                | Kinase |
| V3LHS_315685 | CAMK2N1             | Kinase |
| V3LHS_315686 | CAMK2N1             | Kinase |
| V3LHS_315687 | CAMK2N1             | Kinase |
| V3LHS_315689 | CAMK2N1             | Kinase |
| V3LHS_315718 | IP6K2               | Kinase |
| V3LHS_315740 | ITPKA               | Kinase |
| V3LHS_315927 | MAPK8               | Kinase |
| V3LHS_315928 | MAPK8               | Kinase |
| V3LHS_315931 | MAPK8               | Kinase |
| V3LHS_315988 | NEK11               | Kinase |
| V3LHS_315989 | NEK11               | Kinase |
| V3LHS_315990 | NEK11               | Kinase |
| V3LHS_315993 | NEK11               | Kinase |
| V3LHS_316017 | TP53RK              | Kinase |
| V3LHS_316018 | TP53RK              | Kinase |
| V3LHS_316019 | TP53RK              | Kinase |
| V3LHS_316020 | TP53RK              | Kinase |
| V3LHS_316271 | CLK1, PPIL3         | Kinase |
| V3LHS_316279 | CLK2, CLK2P         | Kinase |
| V3LHS_316282 | CLK2                | Kinase |
| V3LHS_316283 | CLK2                | Kinase |

|              |         |        |
|--------------|---------|--------|
| V3LHS_316285 | RPS6KA4 | Kinase |
| V3LHS_316556 | PIK3CG  | Kinase |
| V3LHS_316558 | PIK3CG  | Kinase |
| V3LHS_316559 | PIK3CG  | Kinase |
| V3LHS_316560 | Pik3cg  | Kinase |
| V3LHS_316561 | PIK3CG  | Kinase |
| V3LHS_316562 | CALM1   | Kinase |
| V3LHS_316564 | CALM1   | Kinase |
| V3LHS_316565 | Calm1   | Kinase |
| V3LHS_316566 | Calm1   | Kinase |
| V3LHS_316568 | ULK1    | Kinase |
| V3LHS_316709 | DMPK    | Kinase |
| V3LHS_316966 | MAPK14  | Kinase |
| V3LHS_316968 | MAPK14  | Kinase |
| V3LHS_316970 | MAPK14  | Kinase |
| V3LHS_317055 | Dgki    | Kinase |
| V3LHS_317056 | DGKI    | Kinase |
| V3LHS_317057 | Dgki    | Kinase |
| V3LHS_317059 | DGKI    | Kinase |
| V3LHS_317060 | DGKI    | Kinase |
| V3LHS_317130 | ETNK2   | Kinase |
| V3LHS_317131 | ETNK2   | Kinase |
| V3LHS_317132 | ETNK2   | Kinase |
| V3LHS_317265 | BMX     | Kinase |
| V3LHS_317267 | BMX     | Kinase |
| V3LHS_317268 | BMX     | Kinase |
| V3LHS_317304 | EIF2AK2 | Kinase |
| V3LHS_317305 | EIF2AK2 | Kinase |
| V3LHS_317306 | EIF2AK2 | Kinase |
| V3LHS_317308 | EIF2AK2 | Kinase |
| V3LHS_317309 | EIF2AK2 | Kinase |
| V3LHS_317619 | CDK18   | Kinase |
| V3LHS_317621 | CDK18   | Kinase |
| V3LHS_317628 | STK3    | Kinase |
| V3LHS_317630 | STK3    | Kinase |
| V3LHS_317631 | STK3    | Kinase |
| V3LHS_317632 | STK3    | Kinase |
| V3LHS_317767 | PRKAR2B | Kinase |
| V3LHS_317768 | PRKAR2B | Kinase |
| V3LHS_317937 | UCK1    | Kinase |
| V3LHS_317938 | UCK1    | Kinase |
| V3LHS_317939 | UCK1    | Kinase |
| V3LHS_318271 | PKN2    | Kinase |
| V3LHS_318367 | MARK2   | Kinase |
| V3LHS_318369 | MARK2   | Kinase |
| V3LHS_318371 | MARK2   | Kinase |
| V3LHS_318575 | PRKCA   | Kinase |

|              |        |        |
|--------------|--------|--------|
| V3LHS_318577 | PRKCA  | Kinase |
| V3LHS_318578 | PRKCA  | Kinase |
| V3LHS_318580 | PRKCA  | Kinase |
| V3LHS_318635 | CDADC1 | Kinase |
| V3LHS_318859 | PGK2   | Kinase |
| V3LHS_318860 | PGK2   | Kinase |
| V3LHS_318861 | PGK2   | Kinase |
| V3LHS_319394 | CDK15  | Kinase |
| V3LHS_319395 | CDK15  | Kinase |
| V3LHS_319396 | CDK15  | Kinase |
| V3LHS_319399 | CDK15  | Kinase |
| V3LHS_319583 | DDR2   | Kinase |
| V3LHS_319584 | DDR2   | Kinase |
| V3LHS_319585 | DDR2   | Kinase |
| V3LHS_319586 | DDR2   | Kinase |
| V3LHS_319829 | PINK1  | Kinase |
| V3LHS_319834 | PINK1  | Kinase |
| V3LHS_319890 | INSR   | Kinase |
| V3LHS_319894 | INSR   | Kinase |
| V3LHS_320007 | TRIO   | Kinase |
| V3LHS_320009 | TRIO   | Kinase |
| V3LHS_320010 | TRIO   | Kinase |
| V3LHS_320290 | MINK1  | Kinase |
| V3LHS_320291 | MINK1  | Kinase |
| V3LHS_320298 | DGKK   | Kinase |
| V3LHS_320299 | DGKK   | Kinase |
| V3LHS_320301 | DGKK   | Kinase |
| V3LHS_320506 | ITK    | Kinase |
| V3LHS_320507 | ITK    | Kinase |
| V3LHS_320554 | VRK3   | Kinase |
| V3LHS_320577 | TAF1   | Kinase |
| V3LHS_320582 | TAF1   | Kinase |
| V3LHS_320594 | CDKL3  | Kinase |
| V3LHS_320595 | CDKL3  | Kinase |
| V3LHS_320598 | CDKL3  | Kinase |
| V3LHS_320618 | DAPK3  | Kinase |
| V3LHS_320619 | DAPK3  | Kinase |
| V3LHS_320621 | DAPK3  | Kinase |
| V3LHS_320622 | DAPK3  | Kinase |
| V3LHS_320829 | ITPK1  | Kinase |
| V3LHS_320831 | ITPK1  | Kinase |
| V3LHS_320950 | CERK   | Kinase |
| V3LHS_321230 | RIOK3  | Kinase |
| V3LHS_321233 | RIOK3  | Kinase |
| V3LHS_321433 | Tnk2   | Kinase |
| V3LHS_321434 | TNK2   | Kinase |
| V3LHS_322058 | PKM    | Kinase |

|              |        |        |
|--------------|--------|--------|
| V3LHS_322059 | PKM    | Kinase |
| V3LHS_322060 | PKM    | Kinase |
| V3LHS_322061 | PKM    | Kinase |
| V3LHS_322109 | MLKL   | Kinase |
| V3LHS_322110 | MLKL   | Kinase |
| V3LHS_322112 | MLKL   | Kinase |
| V3LHS_322113 | MLKL   | Kinase |
| V3LHS_322114 | MLKL   | Kinase |
| V3LHS_322119 | NIM1   | Kinase |
| V3LHS_322122 | NIM1   | Kinase |
| V3LHS_322123 | NIM1   | Kinase |
| V3LHS_322223 | EPHA6  | Kinase |
| V3LHS_322224 | EPHA6  | Kinase |
| V3LHS_322225 | Epha6  | Kinase |
| V3LHS_322231 | CDKN1A | Kinase |
| V3LHS_322232 | CDKN1A | Kinase |
| V3LHS_322234 | CDKN1A | Kinase |
| V3LHS_322258 | AK5    | Kinase |
| V3LHS_322259 | AK5    | Kinase |
| V3LHS_322262 | AK5    | Kinase |
| V3LHS_322263 | AK5    | Kinase |
| V3LHS_322285 | ADRBK2 | Kinase |
| V3LHS_322286 | ADRBK2 | Kinase |
| V3LHS_322287 | ADRBK2 | Kinase |
| V3LHS_322288 | ADRBK2 | Kinase |
| V3LHS_322360 | N4BP2  | Kinase |
| V3LHS_322361 | N4BP2  | Kinase |
| V3LHS_322365 | N4BP2  | Kinase |
| V3LHS_322473 | PKIB   | Kinase |
| V3LHS_322474 | PKIB   | Kinase |
| V3LHS_322475 | PKIB   | Kinase |
| V3LHS_322476 | PKIB   | Kinase |
| V3LHS_322555 | TWF2   | Kinase |
| V3LHS_322577 | EPHA2  | Kinase |
| V3LHS_322611 | PRKCI  | Kinase |
| V3LHS_322612 | PRKCI  | Kinase |
| V3LHS_322613 | PRKCI  | Kinase |
| V3LHS_322614 | PRKCI  | Kinase |
| V3LHS_322615 | PRKCI  | Kinase |
| V3LHS_322820 | KCNH8  | Kinase |
| V3LHS_322822 | KCNH8  | Kinase |
| V3LHS_322824 | KCNH8  | Kinase |
| V3LHS_322950 | NEK5   | Kinase |
| V3LHS_322951 | NEK5   | Kinase |
| V3LHS_322952 | NEK5   | Kinase |
| V3LHS_322953 | NEK5   | Kinase |
| V3LHS_323072 | GUCY2C | Kinase |

|              |             |        |
|--------------|-------------|--------|
| V3LHS_323076 | GUCY2C      | Kinase |
| V3LHS_323077 | GUCY2C      | Kinase |
| V3LHS_323107 | LTK         | Kinase |
| V3LHS_323441 | PAPSS2      | Kinase |
| V3LHS_323444 | PAPSS2      | Kinase |
| V3LHS_323446 | PAPSS2      | Kinase |
| V3LHS_323704 | TAOK3       | Kinase |
| V3LHS_323706 | TAOK3       | Kinase |
| V3LHS_323707 | TAOK3       | Kinase |
| V3LHS_323708 | TAOK3       | Kinase |
| V3LHS_323833 | Map4k1      | Kinase |
| V3LHS_323834 | MAP4K1      | Kinase |
| V3LHS_323855 | NME4        | Kinase |
| V3LHS_323858 | NME4        | Kinase |
| V3LHS_323889 | PANK1       | Kinase |
| V3LHS_323904 | PRPS2       | Kinase |
| V3LHS_323905 | PRPS2       | Kinase |
| V3LHS_323906 | PRPS2       | Kinase |
| V3LHS_324492 | MYLK        | Kinase |
| V3LHS_324564 | NME6        | Kinase |
| V3LHS_324566 | NME6        | Kinase |
| V3LHS_324568 | NME6        | Kinase |
| V3LHS_324774 | GRK1        | Kinase |
| V3LHS_324776 | GRK1        | Kinase |
| V3LHS_324777 | GRK1        | Kinase |
| V3LHS_324855 | IRAK4       | Kinase |
| V3LHS_324856 | IRAK4       | Kinase |
| V3LHS_324859 | IRAK4       | Kinase |
| V3LHS_324860 | IRAK4       | Kinase |
| V3LHS_324958 | NUP62       | Kinase |
| V3LHS_325020 | MAGI2       | Kinase |
| V3LHS_325022 | MAGI2       | Kinase |
| V3LHS_325024 | MAGI2       | Kinase |
| V3LHS_325025 | MAGI2       | Kinase |
| V3LHS_325230 | ADRBK1      | Kinase |
| V3LHS_325231 | ADRBK1      | Kinase |
| V3LHS_325400 | ACVR2A      | Kinase |
| V3LHS_325401 | ACVR2A      | Kinase |
| V3LHS_325557 | AKT2        | Kinase |
| V3LHS_325679 | NEK1        | Kinase |
| V3LHS_325680 | NEK1        | Kinase |
| V3LHS_325681 | NEK1, Sox13 | Kinase |
| V3LHS_325682 | NEK1        | Kinase |
| V3LHS_325803 | PTK2        | Kinase |
| V3LHS_325804 | PTK2        | Kinase |
| V3LHS_325806 | PTK2        | Kinase |
| V3LHS_325807 | Ptk2        | Kinase |



|              |                     |        |
|--------------|---------------------|--------|
| V3LHS_325899 | CDK10               | Kinase |
| V3LHS_325918 | TSKS                | Kinase |
| V3LHS_325920 | TSKS                | Kinase |
| V3LHS_325921 | TSKS                | Kinase |
| V3LHS_326034 | TTK                 | Kinase |
| V3LHS_326035 | TTK                 | Kinase |
| V3LHS_326037 | TTK                 | Kinase |
| V3LHS_326038 | TTK                 | Kinase |
| V3LHS_326107 | HIPK3               | Kinase |
| V3LHS_326167 | CDC42BPB            | Kinase |
| V3LHS_326168 | CDC42BPB            | Kinase |
| V3LHS_326169 | CDC42BPB            | Kinase |
| V3LHS_326171 | CDC42BPB            | Kinase |
| V3LHS_326416 | CDC42BPA            | Kinase |
| V3LHS_326424 | GK, GK3P            | Kinase |
| V3LHS_326425 | GK, GK3P            | Kinase |
| V3LHS_326426 | GK, GK3P            | Kinase |
| V3LHS_326427 | GK, GK3P, Gyk, Gyk1 | Kinase |
| V3LHS_326591 | CSNK1E              | Kinase |
| V3LHS_326592 | CSNK1E              | Kinase |
| V3LHS_326593 | Csnk1e              | Kinase |
| V3LHS_326594 | CSNK1E              | Kinase |
| V3LHS_326800 | EPHA5               | Kinase |
| V3LHS_326801 | EPHA5               | Kinase |
| V3LHS_326803 | EPHA5               | Kinase |
| V3LHS_326804 | EPHA5               | Kinase |
| V3LHS_326805 | EPHA5               | Kinase |
| V3LHS_327146 | GALK1               | Kinase |
| V3LHS_327147 | GALK1               | Kinase |
| V3LHS_327148 | GALK1               | Kinase |
| V3LHS_327149 | GALK1               | Kinase |
| V3LHS_327150 | GALK1               | Kinase |
| V3LHS_327151 | GALK1               | Kinase |
| V3LHS_327200 | RPS6KC1             | Kinase |
| V3LHS_327244 | CDK11A              | Kinase |
| V3LHS_327347 | CDC42BPA            | Kinase |
| V3LHS_327349 | CDC42BPA            | Kinase |
| V3LHS_327351 | CDC42BPA            | Kinase |
| V3LHS_327445 | RIPK4               | Kinase |
| V3LHS_327482 | PIK3R1              | Kinase |
| V3LHS_327483 | PIK3R1              | Kinase |
| V3LHS_327485 | PIK3R1              | Kinase |
| V3LHS_327539 | JAK2                | Kinase |
| V3LHS_327543 | JAK2                | Kinase |
| V3LHS_328124 | Pck2                | Kinase |
| V3LHS_328126 | Pck2                | Kinase |
| V3LHS_328132 | MAP3K6              | Kinase |

|              |                |        |
|--------------|----------------|--------|
| V3LHS_328354 | STYK1          | Kinase |
| V3LHS_328594 | CDK1           | Kinase |
| V3LHS_328802 | Map4k3         | Kinase |
| V3LHS_328804 | MAP4K3         | Kinase |
| V3LHS_328805 | MAP4K3         | Kinase |
| V3LHS_328806 | MAP4K3         | Kinase |
| V3LHS_328976 | SGK1           | Kinase |
| V3LHS_328979 | SGK1           | Kinase |
| V3LHS_328981 | SGK1           | Kinase |
| V3LHS_329061 | CKM            | Kinase |
| V3LHS_329062 | CKM            | Kinase |
| V3LHS_329063 | CKM            | Kinase |
| V3LHS_329064 | CKM            | Kinase |
| V3LHS_329066 | Ckm            | Kinase |
| V3LHS_329306 | STK33          | Kinase |
| V3LHS_329307 | STK33          | Kinase |
| V3LHS_329308 | STK33          | Kinase |
| V3LHS_329347 | IPMK           | Kinase |
| V3LHS_329349 | IPMK           | Kinase |
| V3LHS_329350 | IPMK           | Kinase |
| V3LHS_329520 | MAP3K3         | Kinase |
| V3LHS_329521 | MAP3K3         | Kinase |
| V3LHS_329522 | MAP3K3         | Kinase |
| V3LHS_329524 | MAP3K3         | Kinase |
| V3LHS_329651 | AXL            | Kinase |
| V3LHS_329652 | AXL            | Kinase |
| V3LHS_329653 | Axl            | Kinase |
| V3LHS_329807 | PKN3           | Kinase |
| V3LHS_329808 | PKN3           | Kinase |
| V3LHS_329810 | PKN3           | Kinase |
| V3LHS_329811 | PKN3           | Kinase |
| V3LHS_330127 | CDK11A, CDK11B | Kinase |
| V3LHS_330130 | CDK11A, CDK11B | Kinase |
| V3LHS_330131 | CDK11A, CDK11B | Kinase |
| V3LHS_330188 | HIPK2          | Kinase |
| V3LHS_330191 | HIPK2          | Kinase |
| V3LHS_330192 | HIPK2          | Kinase |
| V3LHS_330194 | PDPK1, PDPK2   | Kinase |
| V3LHS_330196 | PDPK1, PDPK2   | Kinase |
| V3LHS_330199 | MAP3K8         | Kinase |
| V3LHS_330201 | MAP3K8         | Kinase |
| V3LHS_330246 | Magi1          | Kinase |
| V3LHS_330413 | TAF1L          | Kinase |
| V3LHS_330604 | AK3            | Kinase |
| V3LHS_330605 | AK3            | Kinase |
| V3LHS_330644 | LATS1          | Kinase |
| V3LHS_330646 | LATS1          | Kinase |

|              |                      |        |
|--------------|----------------------|--------|
| V3LHS_330648 | LATS1                | Kinase |
| V3LHS_330649 | LATS1                | Kinase |
| V3LHS_330877 | SKAP1                | Kinase |
| V3LHS_330878 | SKAP1                | Kinase |
| V3LHS_330881 | Dnah5, Dnahc5, SKAP1 | Kinase |
| V3LHS_331302 | HIPK4                | Kinase |
| V3LHS_331303 | HIPK4                | Kinase |
| V3LHS_331304 | HIPK4                | Kinase |
| V3LHS_331527 | PDXK                 | Kinase |
| V3LHS_331530 | PDXK                 | Kinase |
| V3LHS_331602 | ADCK1                | Kinase |
| V3LHS_331603 | ADCK1                | Kinase |
| V3LHS_331863 | Pfkm                 | Kinase |
| V3LHS_331864 | Pfkm                 | Kinase |
| V3LHS_331866 | PFKM                 | Kinase |
| V3LHS_332062 | HSPB8                | Kinase |
| V3LHS_332215 | FLT3                 | Kinase |
| V3LHS_332216 | FLT3                 | Kinase |
| V3LHS_332217 | FLT3                 | Kinase |
| V3LHS_332219 | FLT3                 | Kinase |
| V3LHS_332239 | NME1                 | Kinase |
| V3LHS_332240 | NME1                 | Kinase |
| V3LHS_332241 | NME1                 | Kinase |
| V3LHS_332265 | CDK14                | Kinase |
| V3LHS_332268 | CDK14                | Kinase |
| V3LHS_332419 | Mapkapk3             | Kinase |
| V3LHS_332421 | MAPKAPK3             | Kinase |
| V3LHS_332908 | GNE                  | Kinase |
| V3LHS_332910 | GNE                  | Kinase |
| V3LHS_332913 | GNE                  | Kinase |
| V3LHS_333009 | EFNA5                | Kinase |
| V3LHS_333010 | Efna5                | Kinase |
| V3LHS_333013 | Efna5                | Kinase |
| V3LHS_333212 | MAP4K2               | Kinase |
| V3LHS_333215 | MAP4K2               | Kinase |
| V3LHS_333229 | STK35                | Kinase |
| V3LHS_333309 | SIK2                 | Kinase |
| V3LHS_333310 | SIK2                 | Kinase |
| V3LHS_333311 | SIK2                 | Kinase |
| V3LHS_333341 | LCK                  | Kinase |
| V3LHS_333871 | ALK                  | Kinase |
| V3LHS_333872 | ALK                  | Kinase |
| V3LHS_333875 | ALK                  | Kinase |
| V3LHS_333876 | ALK                  | Kinase |
| V3LHS_334044 | CDK5R2               | Kinase |
| V3LHS_334045 | CDK5R2               | Kinase |
| V3LHS_334047 | CDK5R2               | Kinase |

|              |                |        |
|--------------|----------------|--------|
| V3LHS_334048 | CDK5R2         | Kinase |
| V3LHS_334404 | MAP4K5         | Kinase |
| V3LHS_334407 | MAP4K5         | Kinase |
| V3LHS_334408 | MAP4K5         | Kinase |
| V3LHS_334847 | AURKC          | Kinase |
| V3LHS_334849 | AURKC          | Kinase |
| V3LHS_334931 | MYO3B          | Kinase |
| V3LHS_334997 | FER            | Kinase |
| V3LHS_334998 | FER            | Kinase |
| V3LHS_335000 | FER            | Kinase |
| V3LHS_335001 | FER, Fert2     | Kinase |
| V3LHS_335002 | FER            | Kinase |
| V3LHS_335008 | MAP2K7         | Kinase |
| V3LHS_335010 | MAP2K7         | Kinase |
| V3LHS_335075 | CDK11A, CDK11B | Kinase |
| V3LHS_335076 | CDK11A         | Kinase |
| V3LHS_335370 | CHKA           | Kinase |
| V3LHS_335372 | CHKA           | Kinase |
| V3LHS_335473 | TBK1           | Kinase |
| V3LHS_335476 | TBK1           | Kinase |
| V3LHS_335550 | PSTK           | Kinase |
| V3LHS_335552 | PSTK           | Kinase |
| V3LHS_335553 | PSTK           | Kinase |
| V3LHS_335655 | TLK1           | Kinase |
| V3LHS_335779 | TYRO3          | Kinase |
| V3LHS_335782 | TYRO3          | Kinase |
| V3LHS_336353 | AK7            | Kinase |
| V3LHS_336354 | AK7            | Kinase |
| V3LHS_336356 | AK7            | Kinase |
| V3LHS_336357 | AK7            | Kinase |
| V3LHS_336642 | CDK2           | Kinase |
| V3LHS_336769 | ZAK            | Kinase |
| V3LHS_336771 | ZAK            | Kinase |
| V3LHS_336773 | ZAK            | Kinase |
| V3LHS_336853 | PRKCD          | Kinase |
| V3LHS_336854 | PRKCD          | Kinase |
| V3LHS_336865 | NEK8           | Kinase |
| V3LHS_336866 | NEK8           | Kinase |
| V3LHS_336869 | Nek8           | Kinase |
| V3LHS_336870 | NEK8           | Kinase |
| V3LHS_336948 | PKLR           | Kinase |
| V3LHS_336949 | PKLR           | Kinase |
| V3LHS_336950 | PkIr           | Kinase |
| V3LHS_337056 | GALK2          | Kinase |
| V3LHS_337823 | TRIB1          | Kinase |
| V3LHS_337824 | TRIB1          | Kinase |
| V3LHS_337951 | NTRK2          | Kinase |

|              |            |        |
|--------------|------------|--------|
| V3LHS_337952 | NTRK2      | Kinase |
| V3LHS_338235 | KSR2       | Kinase |
| V3LHS_338237 | KSR2       | Kinase |
| V3LHS_338240 | KSR2       | Kinase |
| V3LHS_338396 | PFKFB3     | Kinase |
| V3LHS_338398 | PFKFB3     | Kinase |
| V3LHS_338399 | PFKFB3     | Kinase |
| V3LHS_338400 | PFKFB3     | Kinase |
| V3LHS_338478 | MAP3K4     | Kinase |
| V3LHS_338479 | MAP3K4     | Kinase |
| V3LHS_338549 | ROCK1      | Kinase |
| V3LHS_338550 | ROCK1      | Kinase |
| V3LHS_338552 | ROCK1      | Kinase |
| V3LHS_338604 | EFNA4      | Kinase |
| V3LHS_338605 | EFNA4      | Kinase |
| V3LHS_338710 | BCR, BCRP2 | Kinase |
| V3LHS_338728 | MVK        | Kinase |
| V3LHS_338729 | MVK        | Kinase |
| V3LHS_338730 | MVK        | Kinase |
| V3LHS_338731 | MVK        | Kinase |
| V3LHS_339044 | PNKP       | Kinase |
| V3LHS_339045 | PNKP       | Kinase |
| V3LHS_339046 | PNKP       | Kinase |
| V3LHS_339047 | PNKP       | Kinase |
| V3LHS_339048 | PNKP       | Kinase |
| V3LHS_339049 | PNKP       | Kinase |
| V3LHS_339400 | KDR        | Kinase |
| V3LHS_339401 | KDR        | Kinase |
| V3LHS_339405 | VRK1       | Kinase |
| V3LHS_339407 | Vrk1       | Kinase |
| V3LHS_339408 | VRK1       | Kinase |
| V3LHS_339409 | VRK1       | Kinase |
| V3LHS_339434 | UHMK1      | Kinase |
| V3LHS_339476 | PIM1       | Kinase |
| V3LHS_339477 | PIM1       | Kinase |
| V3LHS_339652 | TNIK       | Kinase |
| V3LHS_339653 | TNIK       | Kinase |
| V3LHS_339654 | TNIK       | Kinase |
| V3LHS_339656 | TNIK       | Kinase |
| V3LHS_339657 | TNIK       | Kinase |
| V3LHS_339696 | PFKFB2     | Kinase |
| V3LHS_339697 | PFKFB2     | Kinase |
| V3LHS_339698 | PFKFB2     | Kinase |
| V3LHS_339700 | PFKFB2     | Kinase |
| V3LHS_339765 | CHEK1      | Kinase |
| V3LHS_339796 | Rps6ka1    | Kinase |
| V3LHS_339797 | RPS6KA1    | Kinase |

|              |         |        |
|--------------|---------|--------|
| V3LHS_339798 | RPS6KA1 | Kinase |
| V3LHS_339827 | MAST3   | Kinase |
| V3LHS_339830 | MAST3   | Kinase |
| V3LHS_339831 | MAST3   | Kinase |
| V3LHS_340227 | PRKCB   | Kinase |
| V3LHS_340228 | PRKCB   | Kinase |
| V3LHS_340230 | PRKCB   | Kinase |
| V3LHS_340231 | PRKCB   | Kinase |
| V3LHS_340232 | Prkcb   | Kinase |
| V3LHS_340278 | PRKAB2  | Kinase |
| V3LHS_340280 | PRKAB2  | Kinase |
| V3LHS_340403 | MARK3   | Kinase |
| V3LHS_340404 | MARK3   | Kinase |
| V3LHS_340405 | MARK3   | Kinase |
| V3LHS_340407 | MARK3   | Kinase |
| V3LHS_340408 | MARK3   | Kinase |
| V3LHS_340514 | RIPK1   | Kinase |
| V3LHS_340705 | DGKA    | Kinase |
| V3LHS_340709 | DGKA    | Kinase |
| V3LHS_340988 | PIK3R3  | Kinase |
| V3LHS_340990 | PIK3R3  | Kinase |
| V3LHS_340992 | PIK3R3  | Kinase |
| V3LHS_341074 | BMPR1A  | Kinase |
| V3LHS_341075 | BMPR1A  | Kinase |
| V3LHS_341077 | Bmpr1a  | Kinase |
| V3LHS_341129 | Tssk4   | Kinase |
| V3LHS_341130 | TSSK4   | Kinase |
| V3LHS_341133 | TSSK4   | Kinase |
| V3LHS_341158 | PANK4   | Kinase |
| V3LHS_341248 | PIK3CB  | Kinase |
| V3LHS_341249 | Pik3cb  | Kinase |
| V3LHS_341250 | PIK3CB  | Kinase |
| V3LHS_341251 | PIK3CB  | Kinase |
| V3LHS_341339 | MARK1   | Kinase |
| V3LHS_341343 | MARK1   | Kinase |
| V3LHS_341639 | STK25   | Kinase |
| V3LHS_341640 | STK25   | Kinase |
| V3LHS_341643 | STK25   | Kinase |
| V3LHS_341782 | DYRK2   | Kinase |
| V3LHS_341783 | DYRK2   | Kinase |
| V3LHS_341784 | DYRK2   | Kinase |
| V3LHS_341785 | DYRK2   | Kinase |
| V3LHS_341787 | DYRK2   | Kinase |
| V3LHS_341836 | AURKB   | Kinase |
| V3LHS_341837 | AURKB   | Kinase |
| V3LHS_341839 | AURKB   | Kinase |
| V3LHS_341840 | AURKB   | Kinase |

|              |                            |        |
|--------------|----------------------------|--------|
| V3LHS_341841 | AURKB                      | Kinase |
| V3LHS_342135 | MAPKAPK2                   | Kinase |
| V3LHS_342136 | Mapkapk2                   | Kinase |
| V3LHS_342138 | MAPKAPK2                   | Kinase |
| V3LHS_342139 | MAPKAPK2                   | Kinase |
| V3LHS_342189 | PHKA1                      | Kinase |
| V3LHS_342192 | PHKA1                      | Kinase |
| V3LHS_342421 | ULK3                       | Kinase |
| V3LHS_342422 | ULK3                       | Kinase |
| V3LHS_342447 | AK4                        | Kinase |
| V3LHS_342534 | RIPK3                      | Kinase |
| V3LHS_342539 | RIPK3                      | Kinase |
| V3LHS_342686 | NAGK                       | Kinase |
| V3LHS_342688 | NAGK                       | Kinase |
| V3LHS_342710 | STK38L                     | Kinase |
| V3LHS_342712 | STK38L                     | Kinase |
| V3LHS_342714 | STK38L                     | Kinase |
| V3LHS_342876 | NLK, RGD1561440            | Kinase |
| V3LHS_342878 | NLK, RGD1561440            | Kinase |
| V3LHS_342914 | STK32A                     | Kinase |
| V3LHS_342918 | STK32A                     | Kinase |
| V3LHS_343527 | IP6K2                      | Kinase |
| V3LHS_343528 | IP6K2                      | Kinase |
| V3LHS_343529 | IP6K2                      | Kinase |
| V3LHS_343530 | IP6K2                      | Kinase |
| V3LHS_343689 | GRK6                       | Kinase |
| V3LHS_343690 | GRK6                       | Kinase |
| V3LHS_344018 | MYO3A                      | Kinase |
| V3LHS_344247 | AURKA                      | Kinase |
| V3LHS_344351 | CDK11A                     | Kinase |
| V3LHS_344352 | CDK11A                     | Kinase |
| V3LHS_344356 | CDK11A, Cdk11b, RGD1566355 | Kinase |
| V3LHS_344390 | SPEG                       | Kinase |
| V3LHS_344391 | SPEG                       | Kinase |
| V3LHS_344392 | SPEG                       | Kinase |
| V3LHS_344394 | SPEG                       | Kinase |
| V3LHS_344531 | IP6K3                      | Kinase |
| V3LHS_344532 | IP6K3                      | Kinase |
| V3LHS_344612 | MAPK6                      | Kinase |
| V3LHS_344613 | MAPK6                      | Kinase |
| V3LHS_344623 | HK2                        | Kinase |
| V3LHS_344626 | HK2                        | Kinase |
| V3LHS_344836 | CLK1, PPIL3                | Kinase |
| V3LHS_344944 | BRDT                       | Kinase |
| V3LHS_345012 | ALPK3                      | Kinase |
| V3LHS_345013 | ALPK3                      | Kinase |
| V3LHS_345083 | Hunk                       | Kinase |

|              |              |        |
|--------------|--------------|--------|
| V3LHS_345084 | HUNK         | Kinase |
| V3LHS_345087 | HUNK         | Kinase |
| V3LHS_345088 | Hunk         | Kinase |
| V3LHS_345089 | Dclk2        | Kinase |
| V3LHS_345091 | DCLK2        | Kinase |
| V3LHS_345093 | DCLK2        | Kinase |
| V3LHS_345238 | COL4A3BP     | Kinase |
| V3LHS_345241 | COL4A3BP     | Kinase |
| V3LHS_345294 | Ryk          | Kinase |
| V3LHS_345296 | RYK          | Kinase |
| V3LHS_345516 | YES1         | Kinase |
| V3LHS_345518 | YES1         | Kinase |
| V3LHS_345521 | YES1         | Kinase |
| V3LHS_345590 | Pip4k2b      | Kinase |
| V3LHS_345591 | Pip4k2b      | Kinase |
| V3LHS_345592 | PIP4K2B      | Kinase |
| V3LHS_345637 | Magi3        | Kinase |
| V3LHS_345639 | MAGI3        | Kinase |
| V3LHS_345709 | MARK4        | Kinase |
| V3LHS_345710 | Mark3, Mark4 | Kinase |
| V3LHS_345711 | MARK4        | Kinase |
| V3LHS_345712 | MARK4        | Kinase |
| V3LHS_345750 | KIT          | Kinase |
| V3LHS_345751 | KIT          | Kinase |
| V3LHS_345754 | KIT          | Kinase |
| V3LHS_345790 | RPS6KL1      | Kinase |
| V3LHS_345910 | LMTK2        | Kinase |
| V3LHS_345911 | LMTK2        | Kinase |
| V3LHS_345914 | XRCC6BP1     | Kinase |
| V3LHS_345915 | XRCC6BP1     | Kinase |
| V3LHS_345916 | XRCC6BP1     | Kinase |
| V3LHS_346160 | PANK2        | Kinase |
| V3LHS_346161 | PANK2        | Kinase |
| V3LHS_346162 | PANK2        | Kinase |
| V3LHS_346183 | SLK          | Kinase |
| V3LHS_346294 | GALK2        | Kinase |
| V3LHS_346389 | MAGI1        | Kinase |
| V3LHS_346390 | MAGI1        | Kinase |
| V3LHS_346482 | EPHA4        | Kinase |
| V3LHS_346483 | EPHA4        | Kinase |
| V3LHS_346484 | EPHA4        | Kinase |
| V3LHS_346622 | BMPR1B       | Kinase |
| V3LHS_346623 | BMPR1B       | Kinase |
| V3LHS_346625 | BMPR1B       | Kinase |
| V3LHS_346633 | Prkd2        | Kinase |
| V3LHS_346697 | EIF2AK1      | Kinase |
| V3LHS_346698 | EIF2AK1      | Kinase |



|              |         |        |
|--------------|---------|--------|
| V3LHS_346769 | PLK4    | Kinase |
| V3LHS_346770 | PLK4    | Kinase |
| V3LHS_346771 | PLK4    | Kinase |
| V3LHS_346772 | PLK4    | Kinase |
| V3LHS_346773 | PLK4    | Kinase |
| V3LHS_346807 | CSNK1G3 | Kinase |
| V3LHS_346809 | CSNK1G3 | Kinase |
| V3LHS_346811 | CSNK1G3 | Kinase |
| V3LHS_346861 | MASTL   | Kinase |
| V3LHS_346863 | MASTL   | Kinase |
| V3LHS_346864 | MASTL   | Kinase |
| V3LHS_346940 | PHKG2   | Kinase |
| V3LHS_347013 | BRD3    | Kinase |
| V3LHS_347025 | MYLK    | Kinase |
| V3LHS_347027 | MYLK    | Kinase |
| V3LHS_347028 | MYLK    | Kinase |
| V3LHS_347244 | PAK1    | Kinase |
| V3LHS_347245 | PAK1    | Kinase |
| V3LHS_347265 | STK4    | Kinase |
| V3LHS_347268 | STK4    | Kinase |
| V3LHS_347270 | STK4    | Kinase |
| V3LHS_347293 | FXN     | Kinase |
| V3LHS_347294 | FXN     | Kinase |
| V3LHS_347295 | FXN     | Kinase |
| V3LHS_347296 | FXN     | Kinase |
| V3LHS_347306 | IKBKG   | Kinase |
| V3LHS_347307 | IKBKG   | Kinase |
| V3LHS_347308 | IKBKG   | Kinase |
| V3LHS_347309 | IKBKG   | Kinase |
| V3LHS_347310 | IKBKG   | Kinase |
| V3LHS_347311 | IKBKG   | Kinase |
| V3LHS_347643 | SCYL1   | Kinase |
| V3LHS_347644 | SCYL1   | Kinase |
| V3LHS_347706 | IRAK2   | Kinase |
| V3LHS_347707 | IRAK2   | Kinase |
| V3LHS_347854 | AATK    | Kinase |
| V3LHS_347933 | ACVR2B  | Kinase |
| V3LHS_347934 | ACVR2B  | Kinase |
| V3LHS_347936 | Acvr2b  | Kinase |
| V3LHS_347992 | GUCY2D  | Kinase |
| V3LHS_347994 | GUCY2D  | Kinase |
| V3LHS_348115 | CDKN1C  | Kinase |
| V3LHS_348116 | CDKN1C  | Kinase |
| V3LHS_348117 | CDKN1C  | Kinase |
| V3LHS_348119 | CDKN1C  | Kinase |
| V3LHS_348120 | CDKN1C  | Kinase |
| V3LHS_348187 | NUAK2   | Kinase |

|              |                                                 |        |
|--------------|-------------------------------------------------|--------|
| V3LHS_348189 | NUAK2                                           | Kinase |
| V3LHS_348244 | CSNK1D                                          | Kinase |
| V3LHS_348245 | CSNK1D                                          | Kinase |
| V3LHS_348369 | SGK223                                          | Kinase |
| V3LHS_348497 | KIAA1804                                        | Kinase |
| V3LHS_348500 | KIAA1804                                        | Kinase |
| V3LHS_348528 | PRKAA1                                          | Kinase |
| V3LHS_348529 | PRKAA1                                          | Kinase |
| V3LHS_348531 | PRKAA1                                          | Kinase |
| V3LHS_348532 | PRKAA1                                          | Kinase |
| V3LHS_348533 | PRKAA1                                          | Kinase |
| V3LHS_348592 | WNK1                                            | Kinase |
| V3LHS_348647 | STK11                                           | Kinase |
| V3LHS_348649 | STK11                                           | Kinase |
| V3LHS_348650 | STK11                                           | Kinase |
| V3LHS_348763 | KHK                                             | Kinase |
| V3LHS_348766 | KHK                                             | Kinase |
| V3LHS_348767 | KHK                                             | Kinase |
| V3LHS_348894 | TPK1                                            | Kinase |
| V3LHS_349177 | RET                                             | Kinase |
| V3LHS_349195 | WNK4                                            | Kinase |
| V3LHS_349198 | WNK4                                            | Kinase |
| V3LHS_349199 | WNK4                                            | Kinase |
| V3LHS_349218 | SMG1                                            | Kinase |
| V3LHS_349220 | SMG1                                            | Kinase |
| V3LHS_349221 | BOLA2, LOC100271836, LOC440354, LOC595101, SMG1 | Kinase |
| V3LHS_349222 | SMG1                                            | Kinase |
| V3LHS_349235 | BMP2K                                           | Kinase |
| V3LHS_349379 | PIKFYVE                                         | Kinase |
| V3LHS_349479 | CDK12                                           | Kinase |
| V3LHS_349483 | Cdk12                                           | Kinase |
| V3LHS_349515 | CKS1B, Gm6531                                   | Kinase |
| V3LHS_349565 | RFK                                             | Kinase |
| V3LHS_349566 | RFK, RGD1563242                                 | Kinase |
| V3LHS_349605 | TGFBR2                                          | Kinase |
| V3LHS_349784 | RPS6KB2                                         | Kinase |
| V3LHS_349829 | BTK                                             | Kinase |
| V3LHS_349831 | BTK                                             | Kinase |
| V3LHS_349847 | DGKQ                                            | Kinase |
| V3LHS_349848 | DGKQ                                            | Kinase |
| V3LHS_349849 | DGKQ                                            | Kinase |
| V3LHS_349850 | DGKQ                                            | Kinase |
| V3LHS_349852 | DGKQ                                            | Kinase |
| V3LHS_349854 | STK19                                           | Kinase |
| V3LHS_349950 | EIF2AK3                                         | Kinase |
| V3LHS_350080 | PMVK                                            | Kinase |
| V3LHS_350081 | PMVK                                            | Kinase |

|              |                   |        |
|--------------|-------------------|--------|
| V3LHS_350082 | Pmvk              | Kinase |
| V3LHS_350083 | PMVK              | Kinase |
| V3LHS_350170 | NEK9              | Kinase |
| V3LHS_350171 | NEK9              | Kinase |
| V3LHS_350172 | NEK9              | Kinase |
| V3LHS_350175 | NEK9              | Kinase |
| V3LHS_350194 | EIF2AK4           | Kinase |
| V3LHS_350196 | EIF2AK4           | Kinase |
| V3LHS_350197 | EIF2AK4           | Kinase |
| V3LHS_350469 | ATM               | Kinase |
| V3LHS_350470 | ATM               | Kinase |
| V3LHS_350471 | ATM, NPAT         | Kinase |
| V3LHS_350765 | LYN               | Kinase |
| V3LHS_350767 | LYN               | Kinase |
| V3LHS_350768 | LYN               | Kinase |
| V3LHS_350795 | TAB1              | Kinase |
| V3LHS_350836 | AMHR2             | Kinase |
| V3LHS_350837 | AMHR2             | Kinase |
| V3LHS_350839 | AMHR2             | Kinase |
| V3LHS_351150 | HUS1              | Kinase |
| V3LHS_351151 | HUS1              | Kinase |
| V3LHS_351153 | HUS1              | Kinase |
| V3LHS_351352 | CRIM1             | Kinase |
| V3LHS_351354 | CRIM1             | Kinase |
| V3LHS_351355 | Crim1             | Kinase |
| V3LHS_351356 | CRIM1             | Kinase |
| V3LHS_351357 | CRIM1             | Kinase |
| V3LHS_351541 | PIP5K1A, PIP5K1P1 | Kinase |
| V3LHS_351544 | PIP5K1A           | Kinase |
| V3LHS_351545 | PIP5K1A           | Kinase |
| V3LHS_351546 | PIP5K1A, PIPSL    | Kinase |
| V3LHS_351548 | CDC7              | Kinase |
| V3LHS_351550 | CDC7              | Kinase |
| V3LHS_351551 | CDC7              | Kinase |
| V3LHS_351637 | CSK               | Kinase |
| V3LHS_351640 | CSK               | Kinase |
| V3LHS_351641 | CSK               | Kinase |
| V3LHS_351642 | CSK               | Kinase |
| V3LHS_351732 | PEAK1             | Kinase |
| V3LHS_351733 | PEAK1             | Kinase |
| V3LHS_351734 | PEAK1             | Kinase |
| V3LHS_351737 | PEAK1             | Kinase |
| V3LHS_351804 | CMPK1             | Kinase |
| V3LHS_351879 | CDK20             | Kinase |
| V3LHS_351881 | CDK20             | Kinase |
| V3LHS_352034 | MAPK15            | Kinase |
| V3LHS_352035 | MAPK15            | Kinase |

|              |                         |        |
|--------------|-------------------------|--------|
| V3LHS_352036 | MAPK15                  | Kinase |
| V3LHS_352037 | MAPK15                  | Kinase |
| V3LHS_352038 | MAPK15                  | Kinase |
| V3LHS_352226 | MAST2                   | Kinase |
| V3LHS_352227 | MAST2                   | Kinase |
| V3LHS_352228 | MAST2                   | Kinase |
| V3LHS_352229 | MAST2                   | Kinase |
| V3LHS_352231 | MAST2                   | Kinase |
| V3LHS_352286 | TGFBR2                  | Kinase |
| V3LHS_352287 | TGFBR2                  | Kinase |
| V3LHS_352446 | TGFBR3                  | Kinase |
| V3LHS_352448 | TGFBR3                  | Kinase |
| V3LHS_352450 | TGFBR3                  | Kinase |
| V3LHS_352630 | PI4KA, PI4KAP1, PI4KAP2 | Kinase |
| V3LHS_352878 | EPHA3                   | Kinase |
| V3LHS_353202 | XYLB                    | Kinase |
| V3LHS_353203 | XYLB                    | Kinase |
| V3LHS_353204 | XYLB                    | Kinase |
| V3LHS_353205 | XYLB                    | Kinase |
| V3LHS_353397 | PIP5KL1                 | Kinase |
| V3LHS_353398 | PIP5KL1                 | Kinase |
| V3LHS_353400 | PIP5KL1                 | Kinase |
| V3LHS_353490 | PHKG1                   | Kinase |
| V3LHS_353658 | PRKAB1                  | Kinase |
| V3LHS_353661 | PRKAB1                  | Kinase |
| V3LHS_353981 | IKBKAP                  | Kinase |
| V3LHS_353983 | IKBKAP                  | Kinase |
| V3LHS_353985 | IKBKAP                  | Kinase |
| V3LHS_354115 | FGFRL1                  | Kinase |
| V3LHS_354116 | FGFRL1                  | Kinase |
| V3LHS_354119 | FGFRL1                  | Kinase |
| V3LHS_354120 | ACVR1B                  | Kinase |
| V3LHS_354121 | ACVR1B                  | Kinase |
| V3LHS_354132 | DGKH                    | Kinase |
| V3LHS_354133 | DGKH                    | Kinase |
| V3LHS_354135 | DGKH                    | Kinase |
| V3LHS_354158 | ADK                     | Kinase |
| V3LHS_354159 | ADK                     | Kinase |
| V3LHS_354161 | ADK                     | Kinase |
| V3LHS_354162 | ADK                     | Kinase |
| V3LHS_354670 | CERK                    | Kinase |
| V3LHS_354671 | CERK                    | Kinase |
| V3LHS_354942 | IKBKE                   | Kinase |
| V3LHS_354991 | FASTK                   | Kinase |
| V3LHS_355031 | Braf                    | Kinase |
| V3LHS_355032 | BRAF                    | Kinase |
| V3LHS_355035 | BRAF                    | Kinase |

|              |                   |        |
|--------------|-------------------|--------|
| V3LHS_355087 | TYK2              | Kinase |
| V3LHS_355088 | TYK2              | Kinase |
| V3LHS_355090 | TYK2              | Kinase |
| V3LHS_355091 | TYK2              | Kinase |
| V3LHS_355292 | ICK               | Kinase |
| V3LHS_355296 | ICK               | Kinase |
| V3LHS_355766 | NTRK2             | Kinase |
| V3LHS_355933 | CSNK2A1, CSNK2A1P | Kinase |
| V3LHS_356067 | Dlg4              | Kinase |
| V3LHS_356068 | DLG4              | Kinase |
| V3LHS_356069 | DLG4              | Kinase |
| V3LHS_356070 | DLG4              | Kinase |
| V3LHS_356071 | DLG4              | Kinase |
| V3LHS_356547 | Irak3             | Kinase |
| V3LHS_356549 | IRAK3             | Kinase |
| V3LHS_356550 | IRAK3             | Kinase |
| V3LHS_356551 | IRAK3             | Kinase |
| V3LHS_356552 | IRAK3             | Kinase |
| V3LHS_356568 | SRC               | Kinase |
| V3LHS_356569 | SRC               | Kinase |
| V3LHS_356602 | TESK1             | Kinase |
| V3LHS_356605 | TESK1             | Kinase |
| V3LHS_356606 | TESK1             | Kinase |
| V3LHS_356648 | Cdk19             | Kinase |
| V3LHS_356649 | CDK19             | Kinase |
| V3LHS_356652 | CDK19             | Kinase |
| V3LHS_356812 | WNK2              | Kinase |
| V3LHS_356813 | WNK2              | Kinase |
| V3LHS_356814 | WNK2              | Kinase |
| V3LHS_356815 | WNK2              | Kinase |
| V3LHS_356977 | DCLK3             | Kinase |
| V3LHS_356979 | DCLK3             | Kinase |
| V3LHS_356980 | DCLK3             | Kinase |
| V3LHS_357001 | IPPK              | Kinase |
| V3LHS_357002 | IPPK              | Kinase |
| V3LHS_357435 | KSR1              | Kinase |
| V3LHS_357437 | KSR1              | Kinase |
| V3LHS_357438 | KSR1              | Kinase |
| V3LHS_357440 | KSR1              | Kinase |
| V3LHS_357471 | PACSIN1           | Kinase |
| V3LHS_357475 | PACSIN1           | Kinase |
| V3LHS_357645 | CDK9              | Kinase |
| V3LHS_357647 | CDK9              | Kinase |
| V3LHS_357726 | CHUK              | Kinase |
| V3LHS_357727 | CHUK              | Kinase |
| V3LHS_357729 | CHUK              | Kinase |
| V3LHS_358215 | EPHB1             | Kinase |

|              |         |        |
|--------------|---------|--------|
| V3LHS_358218 | ROCK2   | Kinase |
| V3LHS_358220 | ROCK2   | Kinase |
| V3LHS_358460 | TJP2    | Kinase |
| V3LHS_358461 | TJP2    | Kinase |
| V3LHS_358462 | TJP2    | Kinase |
| V3LHS_358463 | TJP2    | Kinase |
| V3LHS_358464 | TJP2    | Kinase |
| V3LHS_358465 | TJP2    | Kinase |
| V3LHS_358591 | KALRN   | Kinase |
| V3LHS_358593 | Kalrn   | Kinase |
| V3LHS_358595 | KALRN   | Kinase |
| V3LHS_358713 | CAMKV   | Kinase |
| V3LHS_358714 | CAMKV   | Kinase |
| V3LHS_358716 | CAMKV   | Kinase |
| V3LHS_358719 | AKT1    | Kinase |
| V3LHS_358720 | AKT1    | Kinase |
| V3LHS_358752 | FUK     | Kinase |
| V3LHS_358753 | FUK     | Kinase |
| V3LHS_358942 | PDGFRL  | Kinase |
| V3LHS_358943 | PDGFRL  | Kinase |
| V3LHS_358944 | PDGFRL  | Kinase |
| V3LHS_358945 | PDGFRL  | Kinase |
| V3LHS_358946 | PDGFRL  | Kinase |
| V3LHS_359046 | RPS6KA6 | Kinase |
| V3LHS_359047 | RPS6KA6 | Kinase |
| V3LHS_359062 | DAPK2   | Kinase |
| V3LHS_359065 | DAPK2   | Kinase |
| V3LHS_359066 | DAPK2   | Kinase |
| V3LHS_359184 | BUB1B   | Kinase |
| V3LHS_359185 | BUB1B   | Kinase |
| V3LHS_359186 | BUB1B   | Kinase |
| V3LHS_359187 | BUB1B   | Kinase |
| V3LHS_359417 | SPHK1   | Kinase |
| V3LHS_359868 | GCK     | Kinase |
| V3LHS_359869 | GCK     | Kinase |
| V3LHS_359871 | GCK     | Kinase |
| V3LHS_360031 | MELK    | Kinase |
| V3LHS_360032 | MELK    | Kinase |
| V3LHS_360034 | MELK    | Kinase |
| V3LHS_360823 | PI4K2B  | Kinase |
| V3LHS_360861 | CASK    | Kinase |
| V3LHS_360862 | CASK    | Kinase |
| V3LHS_361195 | PRKCE   | Kinase |
| V3LHS_361695 | PXK     | Kinase |
| V3LHS_361697 | PXK     | Kinase |
| V3LHS_361699 | PXK     | Kinase |
| V3LHS_361700 | PXK     | Kinase |

|              |              |        |
|--------------|--------------|--------|
| V3LHS_361881 | DYRK1B       | Kinase |
| V3LHS_361884 | DYRK1B       | Kinase |
| V3LHS_361962 | EGFR         | Kinase |
| V3LHS_361964 | EGFR         | Kinase |
| V3LHS_361965 | EGFR         | Kinase |
| V3LHS_362287 | NPR2         | Kinase |
| V3LHS_362288 | NPR2         | Kinase |
| V3LHS_362290 | Npr2         | Kinase |
| V3LHS_362378 | Prkaca       | Kinase |
| V3LHS_362659 | GRK4         | Kinase |
| V3LHS_362660 | GRK4         | Kinase |
| V3LHS_362661 | GRK4         | Kinase |
| V3LHS_362663 | GRK4         | Kinase |
| V3LHS_362664 | GRK4         | Kinase |
| V3LHS_362798 | Efnb1, EFNB3 | Kinase |
| V3LHS_362800 | EFNB3        | Kinase |
| V3LHS_362839 | Fgr          | Kinase |
| V3LHS_362840 | FGR          | Kinase |
| V3LHS_362844 | BRSK1        | Kinase |
| V3LHS_362846 | BRSK1        | Kinase |
| V3LHS_362847 | BRSK1        | Kinase |
| V3LHS_362848 | BRSK1        | Kinase |
| V3LHS_362849 | BRSK1        | Kinase |
| V3LHS_362902 | EPHA10       | Kinase |
| V3LHS_363360 | CDK7         | Kinase |
| V3LHS_363361 | CDK7         | Kinase |
| V3LHS_363364 | CDK7         | Kinase |
| V3LHS_363440 | PSKH1        | Kinase |
| V3LHS_363444 | PSKH1        | Kinase |
| V3LHS_363598 | TWF1         | Kinase |
| V3LHS_363655 | YSK4         | Kinase |
| V3LHS_363656 | YSK4         | Kinase |
| V3LHS_363657 | YSK4         | Kinase |
| V3LHS_363658 | YSK4         | Kinase |
| V3LHS_363727 | PRKCG        | Kinase |
| V3LHS_363729 | PRKCG        | Kinase |
| V3LHS_363731 | PRKCG        | Kinase |
| V3LHS_363910 | FGFR2        | Kinase |
| V3LHS_364005 | PRPS1L1      | Kinase |
| V3LHS_364010 | PRPS1L1      | Kinase |
| V3LHS_364053 | STK17B       | Kinase |
| V3LHS_364054 | STK17B       | Kinase |
| V3LHS_364056 | Stk17b       | Kinase |
| V3LHS_364135 | DLG2         | Kinase |
| V3LHS_364138 | DLG2         | Kinase |
| V3LHS_364140 | DLG2         | Kinase |
| V3LHS_364152 | PHKB         | Kinase |

|              |         |        |
|--------------|---------|--------|
| V3LHS_364153 | PHKB    | Kinase |
| V3LHS_364154 | PHKB    | Kinase |
| V3LHS_364155 | PHKB    | Kinase |
| V3LHS_364519 | ZAP70   | Kinase |
| V3LHS_364520 | ZAP70   | Kinase |
| V3LHS_364521 | ZAP70   | Kinase |
| V3LHS_364523 | ZAP70   | Kinase |
| V3LHS_364524 | ZAP70   | Kinase |
| V3LHS_364628 | PIK3CA  | Kinase |
| V3LHS_364629 | PIK3CA  | Kinase |
| V3LHS_364630 | Pik3ca  | Kinase |
| V3LHS_364654 | SGK3    | Kinase |
| V3LHS_364655 | SGK3    | Kinase |
| V3LHS_364656 | SGK3    | Kinase |
| V3LHS_364657 | SGK3    | Kinase |
| V3LHS_364659 | Sgk3    | Kinase |
| V3LHS_365003 | CLK2    | Kinase |
| V3LHS_365008 | CLK2    | Kinase |
| V3LHS_365353 | BLK     | Kinase |
| V3LHS_365354 | BLK     | Kinase |
| V3LHS_365399 | Pkdcc   | Kinase |
| V3LHS_365402 | PKDCC   | Kinase |
| V3LHS_365497 | PRKD1   | Kinase |
| V3LHS_365498 | PRKD1   | Kinase |
| V3LHS_365500 | PRKD1   | Kinase |
| V3LHS_365603 | ILK     | Kinase |
| V3LHS_365604 | ILK     | Kinase |
| V3LHS_365606 | ILK     | Kinase |
| V3LHS_365607 | ILK     | Kinase |
| V3LHS_365757 | RPS6KB2 | Kinase |
| V3LHS_365759 | RPS6KB2 | Kinase |
| V3LHS_366009 | CIT     | Kinase |
| V3LHS_366011 | CIT     | Kinase |
| V3LHS_366013 | CIT     | Kinase |
| V3LHS_366123 | DTYMK   | Kinase |
| V3LHS_366125 | DTYMK   | Kinase |
| V3LHS_366126 | DTYMK   | Kinase |
| V3LHS_366127 | DTYMK   | Kinase |
| V3LHS_366143 | SYK     | Kinase |
| V3LHS_366144 | Syk     | Kinase |
| V3LHS_366147 | SYK     | Kinase |
| V3LHS_366148 | SYK     | Kinase |
| V3LHS_366291 | PNCK    | Kinase |
| V3LHS_366471 | CAMK1   | Kinase |
| V3LHS_366472 | CAMK1   | Kinase |
| V3LHS_366473 | CAMK1   | Kinase |
| V3LHS_366474 | CAMK1   | Kinase |



|              |         |        |
|--------------|---------|--------|
| V3LHS_366534 | HK1     | Kinase |
| V3LHS_366535 | HK1     | Kinase |
| V3LHS_366536 | HK1     | Kinase |
| V3LHS_366537 | HK1     | Kinase |
| V3LHS_366539 | HK1     | Kinase |
| V3LHS_366545 | PRKX    | Kinase |
| V3LHS_366546 | PRKX    | Kinase |
| V3LHS_366549 | PRKX    | Kinase |
| V3LHS_366709 | FRK     | Kinase |
| V3LHS_366710 | FRK     | Kinase |
| V3LHS_366711 | FRK     | Kinase |
| V3LHS_366712 | WEE1    | Kinase |
| V3LHS_366716 | WEE1    | Kinase |
| V3LHS_366717 | Wee1    | Kinase |
| V3LHS_366737 | MAPK7   | Kinase |
| V3LHS_366738 | Mapk7   | Kinase |
| V3LHS_366740 | MAPK7   | Kinase |
| V3LHS_366815 | MAP3K5  | Kinase |
| V3LHS_366817 | MAP3K5  | Kinase |
| V3LHS_366820 | MAP3K5  | Kinase |
| V3LHS_367749 | Bckdk   | Kinase |
| V3LHS_367750 | BCKDK   | Kinase |
| V3LHS_367804 | STK38   | Kinase |
| V3LHS_367805 | STK38   | Kinase |
| V3LHS_367866 | CPNE3   | Kinase |
| V3LHS_367868 | CPNE3   | Kinase |
| V3LHS_367870 | Cpne3   | Kinase |
| V3LHS_367955 | C9orf96 | Kinase |
| V3LHS_367957 | C9orf96 | Kinase |
| V3LHS_367958 | C9orf96 | Kinase |
| V3LHS_368348 | CAMK2B  | Kinase |
| V3LHS_368859 | PTK6    | Kinase |
| V3LHS_368862 | PTK6    | Kinase |
| V3LHS_368863 | PTK6    | Kinase |
| V3LHS_369022 | MKNK1   | Kinase |
| V3LHS_369023 | MKNK1   | Kinase |
| V3LHS_369024 | MKNK1   | Kinase |
| V3LHS_369026 | MKNK1   | Kinase |
| V3LHS_369027 | DLG3    | Kinase |
| V3LHS_369028 | DLG3    | Kinase |
| V3LHS_369029 | DLG3    | Kinase |
| V3LHS_369031 | DLG3    | Kinase |
| V3LHS_369217 | ACVR1   | Kinase |
| V3LHS_369326 | MYLK4   | Kinase |
| V3LHS_369328 | MYLK4   | Kinase |
| V3LHS_369329 | MYLK4   | Kinase |
| V3LHS_369423 | GRK6    | Kinase |

|              |        |        |
|--------------|--------|--------|
| V3LHS_369482 | Ephb6  | Kinase |
| V3LHS_369484 | EPHB6  | Kinase |
| V3LHS_369485 | EPHB6  | Kinase |
| V3LHS_369487 | EPHB6  | Kinase |
| V3LHS_369622 | PDK1   | Kinase |
| V3LHS_369623 | PDK1   | Kinase |
| V3LHS_369624 | PDK1   | Kinase |
| V3LHS_369625 | Pdk1   | Kinase |
| V3LHS_370370 | PRKY   | Kinase |
| V3LHS_370844 | PKIA   | Kinase |
| V3LHS_370845 | PKIA   | Kinase |
| V3LHS_370846 | PKIA   | Kinase |
| V3LHS_370923 | MAP3K7 | Kinase |
| V3LHS_370924 | MAP3K7 | Kinase |
| V3LHS_370925 | MAP3K7 | Kinase |
| V3LHS_371037 | Kcnh2  | Kinase |
| V3LHS_371038 | KCNH2  | Kinase |
| V3LHS_371039 | KCNH2  | Kinase |
| V3LHS_371040 | KCNH2  | Kinase |
| V3LHS_371086 | DGKD   | Kinase |
| V3LHS_371088 | DGKD   | Kinase |
| V3LHS_371130 | PDIK1L | Kinase |
| V3LHS_371317 | CKS2   | Kinase |
| V3LHS_371318 | CKS2   | Kinase |
| V3LHS_371319 | CKS2   | Kinase |
| V3LHS_371431 | CDKL1  | Kinase |
| V3LHS_371432 | CDKL1  | Kinase |
| V3LHS_371433 | CDKL1  | Kinase |
| V3LHS_371434 | CDKL1  | Kinase |
| V3LHS_371435 | CDKL1  | Kinase |
| V3LHS_371436 | CDKL1  | Kinase |
| V3LHS_371562 | ADCK5  | Kinase |
| V3LHS_371703 | TSSK2  | Kinase |
| V3LHS_371706 | TSSK2  | Kinase |
| V3LHS_371707 | TSSK2  | Kinase |
| V3LHS_371801 | TWF1   | Kinase |
| V3LHS_371802 | TWF1   | Kinase |
| V3LHS_371803 | TWF1   | Kinase |
| V3LHS_371804 | TWF1   | Kinase |
| V3LHS_371900 | SHPK   | Kinase |
| V3LHS_371901 | SHPK   | Kinase |
| V3LHS_371902 | SHPK   | Kinase |
| V3LHS_371903 | SHPK   | Kinase |
| V3LHS_371905 | GOLGA5 | Kinase |
| V3LHS_371908 | GOLGA5 | Kinase |
| V3LHS_371953 | CDK10  | Kinase |
| V3LHS_371954 | CDK10  | Kinase |

|              |                |        |
|--------------|----------------|--------|
| V3LHS_372035 | PIK3C3         | Kinase |
| V3LHS_372037 | PIK3C3         | Kinase |
| V3LHS_372077 | PIK3C2A        | Kinase |
| V3LHS_372078 | PIK3C2A        | Kinase |
| V3LHS_372082 | PIK3C2A        | Kinase |
| V3LHS_372105 | CDKN1B         | Kinase |
| V3LHS_372106 | CDKN1B         | Kinase |
| V3LHS_372107 | CDKN1B         | Kinase |
| V3LHS_372108 | CDKN1B         | Kinase |
| V3LHS_372137 | ACVRL1         | Kinase |
| V3LHS_372138 | ACVRL1         | Kinase |
| V3LHS_372140 | ACVRL1         | Kinase |
| V3LHS_372141 | ACVRL1         | Kinase |
| V3LHS_372192 | Tk2            | Kinase |
| V3LHS_372195 | TK2            | Kinase |
| V3LHS_372202 | MERTK          | Kinase |
| V3LHS_372203 | MERTK          | Kinase |
| V3LHS_372205 | MERTK          | Kinase |
| V3LHS_372207 | MERTK          | Kinase |
| V3LHS_372245 | PANK3          | Kinase |
| V3LHS_372246 | PANK3          | Kinase |
| V3LHS_372385 | CKMT2          | Kinase |
| V3LHS_372387 | CKMT2          | Kinase |
| V3LHS_372388 | CKMT2          | Kinase |
| V3LHS_372389 | CKMT2          | Kinase |
| V3LHS_372459 | TAOK1          | Kinase |
| V3LHS_372460 | TAOK1          | Kinase |
| V3LHS_372461 | TAOK1          | Kinase |
| V3LHS_372462 | TAOK1          | Kinase |
| V3LHS_372463 | TAOK1          | Kinase |
| V3LHS_372466 | CDK11A, CDK11B | Kinase |
| V3LHS_372556 | MAP2K5         | Kinase |
| V3LHS_372557 | MAP2K5         | Kinase |
| V3LHS_372558 | MAP2K5         | Kinase |
| V3LHS_372559 | MAP2K5         | Kinase |
| V3LHS_372577 | PIKFYVE        | Kinase |
| V3LHS_372578 | Pikfyve        | Kinase |
| V3LHS_372579 | PIKFYVE        | Kinase |
| V3LHS_372580 | PIKFYVE        | Kinase |
| V3LHS_372583 | CSNK1G2        | Kinase |
| V3LHS_372584 | CSNK1G2        | Kinase |
| V3LHS_372585 | CSNK1G2        | Kinase |
| V3LHS_372773 | PRKCZ          | Kinase |
| V3LHS_372820 | Gucy2f         | Kinase |
| V3LHS_372821 | GUCY2F         | Kinase |
| V3LHS_372822 | GUCY2F         | Kinase |
| V3LHS_372860 | Prkdc          | Kinase |

|              |         |        |
|--------------|---------|--------|
| V3LHS_372861 | PRKDC   | Kinase |
| V3LHS_372862 | PRKDC   | Kinase |
| V3LHS_372899 | PRKAR1A | Kinase |
| V3LHS_372900 | PRKAR1A | Kinase |
| V3LHS_372901 | Prkar1a | Kinase |
| V3LHS_372902 | PRKAR1A | Kinase |
| V3LHS_373363 | NEK3    | Kinase |
| V3LHS_373364 | NEK3    | Kinase |
| V3LHS_373365 | NEK3    | Kinase |
| V3LHS_373367 | NEK3    | Kinase |
| V3LHS_373651 | MAK     | Kinase |
| V3LHS_373652 | MAK     | Kinase |
| V3LHS_373974 | PRKAG3  | Kinase |
| V3LHS_373976 | PRKAG3  | Kinase |
| V3LHS_373987 | CALM2   | Kinase |
| V3LHS_373988 | CALM2   | Kinase |
| V3LHS_373989 | Caln2   | Kinase |
| V3LHS_373990 | CALM2   | Kinase |
| V3LHS_374310 | PFKL    | Kinase |
| V3LHS_374312 | PFKL    | Kinase |
| V3LHS_374313 | PFKL    | Kinase |
| V3LHS_374376 | Srpk1   | Kinase |
| V3LHS_374380 | SRPK1   | Kinase |
| V3LHS_374388 | RIOK1   | Kinase |
| V3LHS_374391 | RIOK1   | Kinase |
| V3LHS_374392 | RIOK1   | Kinase |
| V3LHS_374441 | SRP72   | Kinase |
| V3LHS_374442 | SRP72   | Kinase |
| V3LHS_374445 | SRP72   | Kinase |
| V3LHS_374446 | SRP72   | Kinase |
| V3LHS_374740 | TRPM6   | Kinase |
| V3LHS_374741 | TRPM6   | Kinase |
| V3LHS_374742 | TRPM6   | Kinase |
| V3LHS_374743 | TRPM6   | Kinase |
| V3LHS_374782 | CDK4    | Kinase |
| V3LHS_374810 | CIB2    | Kinase |
| V3LHS_374811 | CIB2    | Kinase |
| V3LHS_374812 | CIB2    | Kinase |
| V3LHS_374896 | AKT3    | Kinase |
| V3LHS_374897 | AKT3    | Kinase |
| V3LHS_374900 | AKT3    | Kinase |
| V3LHS_375015 | JAK3    | Kinase |
| V3LHS_375155 | STK32C  | Kinase |
| V3LHS_375157 | Stk32c  | Kinase |
| V3LHS_375159 | STK32C  | Kinase |
| V3LHS_375268 | Tssk3   | Kinase |
| V3LHS_375315 | Prkaa2  | Kinase |

|              |         |        |
|--------------|---------|--------|
| V3LHS_375317 | Prkaa2  | Kinase |
| V3LHS_375319 | PRKAA2  | Kinase |
| V3LHS_375567 | MAP4K4  | Kinase |
| V3LHS_375568 | MAP4K4  | Kinase |
| V3LHS_375570 | MAP4K4  | Kinase |
| V3LHS_375745 | TRPM7   | Kinase |
| V3LHS_375747 | TRPM7   | Kinase |
| V3LHS_375749 | TRPM7   | Kinase |
| V3LHS_375750 | TRPM7   | Kinase |
| V3LHS_375976 | GRK7    | Kinase |
| V3LHS_375978 | GRK7    | Kinase |
| V3LHS_375979 | GRK7    | Kinase |
| V3LHS_375980 | GRK7    | Kinase |
| V3LHS_376195 | PRKAR2A | Kinase |
| V3LHS_376197 | PRKAR2A | Kinase |
| V3LHS_376199 | PRKAR2A | Kinase |
| V3LHS_376200 | PRKAR2A | Kinase |
| V3LHS_376239 | EFNA3   | Kinase |
| V3LHS_376241 | EFNA3   | Kinase |
| V3LHS_376242 | MAP3K12 | Kinase |
| V3LHS_376245 | MAP3K12 | Kinase |
| V3LHS_376310 | PIP5K1C | Kinase |
| V3LHS_376313 | Pip5k1c | Kinase |
| V3LHS_376348 | PCK1    | Kinase |
| V3LHS_376349 | PCK1    | Kinase |
| V3LHS_376351 | PCK1    | Kinase |
| V3LHS_376457 | ERN2    | Kinase |
| V3LHS_376459 | ERN2    | Kinase |
| V3LHS_376671 | DYRK1A  | Kinase |
| V3LHS_376672 | Dyrk1a  | Kinase |
| V3LHS_376757 | Cdkn2c  | Kinase |
| V3LHS_376759 | Cdkn2c  | Kinase |
| V3LHS_377046 | PRKCSH  | Kinase |
| V3LHS_377047 | PRKCSH  | Kinase |
| V3LHS_377049 | PRKCSH  | Kinase |
| V3LHS_377051 | PRKCSH  | Kinase |
| V3LHS_377182 | MAPK1   | Kinase |
| V3LHS_377183 | MAPK1   | Kinase |
| V3LHS_377279 | AK1     | Kinase |
| V3LHS_377280 | AK1     | Kinase |
| V3LHS_377524 | ACVR1B  | Kinase |
| V3LHS_377526 | ACVR1B  | Kinase |
| V3LHS_377625 | MUSK    | Kinase |
| V3LHS_377626 | MUSK    | Kinase |
| V3LHS_377848 | IGF1R   | Kinase |
| V3LHS_377851 | Igf1r   | Kinase |
| V3LHS_377852 | IGF1R   | Kinase |

|              |                         |        |
|--------------|-------------------------|--------|
| V3LHS_377901 | AAK1                    | Kinase |
| V3LHS_377902 | AAK1                    | Kinase |
| V3LHS_377903 | AAK1                    | Kinase |
| V3LHS_377905 | AAK1                    | Kinase |
| V3LHS_377906 | AAK1                    | Kinase |
| V3LHS_378003 | BRD4                    | Kinase |
| V3LHS_378100 | PFKFB4                  | Kinase |
| V3LHS_378101 | PFKFB4                  | Kinase |
| V3LHS_378102 | PFKFB4                  | Kinase |
| V3LHS_378283 | PI4KA, PI4KAP2          | Kinase |
| V3LHS_378286 | PI4KA, PI4KAP1, PI4KAP2 | Kinase |
| V3LHS_378614 | CDKL2                   | Kinase |
| V3LHS_378619 | CDKL2                   | Kinase |
| V3LHS_378937 | NADK                    | Kinase |
| V3LHS_378940 | NADK                    | Kinase |
| V3LHS_379203 | NME5                    | Kinase |
| V3LHS_379207 | NME5                    | Kinase |
| V3LHS_379907 | NRBP2                   | Kinase |
| V3LHS_379908 | NRBP2                   | Kinase |
| V3LHS_379909 | NRBP2                   | Kinase |
| V3LHS_379910 | NRBP2                   | Kinase |
| V3LHS_379927 | TNK1                    | Kinase |
| V3LHS_380012 | MAP3K13                 | Kinase |
| V3LHS_380014 | MAP3K13                 | Kinase |
| V3LHS_380167 | ADPGK                   | Kinase |
| V3LHS_380168 | ADPGK                   | Kinase |
| V3LHS_380169 | ADPGK                   | Kinase |
| V3LHS_380214 | TESK2                   | Kinase |
| V3LHS_380217 | TESK2                   | Kinase |
| V3LHS_380293 | TRIM27                  | Kinase |
| V3LHS_380294 | TRIM27                  | Kinase |
| V3LHS_380830 | TSSK1B                  | Kinase |
| V3LHS_380831 | TSSK1B                  | Kinase |
| V3LHS_380932 | DCK                     | Kinase |
| V3LHS_380933 | Dck                     | Kinase |
| V3LHS_380937 | DCK                     | Kinase |
| V3LHS_381052 | PIM2                    | Kinase |
| V3LHS_381166 | STK17A                  | Kinase |
| V3LHS_381167 | STK17A                  | Kinase |
| V3LHS_381169 | STK17A                  | Kinase |
| V3LHS_381230 | PAK6                    | Kinase |
| V3LHS_381508 | MET                     | Kinase |
| V3LHS_381756 | BUB1                    | Kinase |
| V3LHS_381757 | BUB1                    | Kinase |
| V3LHS_381759 | BUB1                    | Kinase |
| V3LHS_381999 | ALDH18A1                | Kinase |
| V3LHS_382000 | ALDH18A1                | Kinase |

|              |          |        |
|--------------|----------|--------|
| V3LHS_382001 | ALDH18A1 | Kinase |
| V3LHS_382004 | Aldh18a1 | Kinase |
| V3LHS_382041 | YSK4     | Kinase |
| V3LHS_382479 | TTBK2    | Kinase |
| V3LHS_382480 | TTBK2    | Kinase |
| V3LHS_382482 | TTBK2    | Kinase |
| V3LHS_382930 | OXS1     | Kinase |
| V3LHS_382931 | OXS1     | Kinase |
| V3LHS_382933 | OXS1     | Kinase |
| V3LHS_383140 | ADCK2    | Kinase |
| V3LHS_383142 | ADCK2    | Kinase |
| V3LHS_383312 | NEK4     | Kinase |
| V3LHS_383313 | NEK4     | Kinase |
| V3LHS_383315 | NEK4     | Kinase |
| V3LHS_383317 | NEK4     | Kinase |
| V3LHS_383600 | MOK      | Kinase |
| V3LHS_383818 | FN3KRP   | Kinase |
| V3LHS_383819 | FN3KRP   | Kinase |
| V3LHS_383821 | FN3KRP   | Kinase |
| V3LHS_383823 | FN3KRP   | Kinase |
| V3LHS_383853 | SGK196   | Kinase |
| V3LHS_383963 | PRPF4B   | Kinase |
| V3LHS_384241 | DUSP21   | Kinase |
| V3LHS_384250 | ROR2     | Kinase |
| V3LHS_384251 | ROR2     | Kinase |
| V3LHS_384255 | ROR2     | Kinase |
| V3LHS_384315 | STK31    | Kinase |
| V3LHS_384316 | STK31    | Kinase |
| V3LHS_384458 | MAPK10   | Kinase |
| V3LHS_384463 | MAPK10   | Kinase |
| V3LHS_384753 | MAP3K1   | Kinase |
| V3LHS_384754 | MAP3K1   | Kinase |
| V3LHS_384769 | PRKACB   | Kinase |
| V3LHS_384770 | PRKACB   | Kinase |
| V3LHS_384771 | PRKACB   | Kinase |
| V3LHS_384898 | ALPK1    | Kinase |
| V3LHS_384899 | ALPK1    | Kinase |
| V3LHS_385333 | STK24    | Kinase |
| V3LHS_385490 | NUCKS1   | Kinase |
| V3LHS_385491 | NUCKS1   | Kinase |
| V3LHS_385493 | NUCKS1   | Kinase |
| V3LHS_385494 | NUCKS1   | Kinase |
| V3LHS_385495 | NUCKS1   | Kinase |
| V3LHS_385857 | PIP5K1B  | Kinase |
| V3LHS_385859 | Pip5k1b  | Kinase |
| V3LHS_385860 | PIP5K1B  | Kinase |
| V3LHS_385861 | PIP5K1B  | Kinase |

|              |                  |        |
|--------------|------------------|--------|
| V3LHS_385862 | PIP5K1B          | Kinase |
| V3LHS_385921 | ALPK2            | Kinase |
| V3LHS_385922 | ALPK2            | Kinase |
| V3LHS_385923 | ALPK2            | Kinase |
| V3LHS_385926 | ALPK2            | Kinase |
| V3LHS_385928 | FN3K             | Kinase |
| V3LHS_385932 | FN3K             | Kinase |
| V3LHS_386029 | MAP3K9           | Kinase |
| V3LHS_386031 | MAP3K9           | Kinase |
| V3LHS_386032 | MAP3K9           | Kinase |
| V3LHS_386037 | NTRK1            | Kinase |
| V3LHS_386167 | MAPK9            | Kinase |
| V3LHS_386168 | MAPK9            | Kinase |
| V3LHS_386169 | MAPK9            | Kinase |
| V3LHS_386170 | Mapk9            | Kinase |
| V3LHS_386232 | BC016579, UCK2   | Kinase |
| V3LHS_386233 | Uck2             | Kinase |
| V3LHS_386234 | UCK2             | Kinase |
| V3LHS_386235 | UCK2             | Kinase |
| V3LHS_386521 | EPHB2            | Kinase |
| V3LHS_386522 | EPHB2            | Kinase |
| V3LHS_386523 | EPHB2            | Kinase |
| V3LHS_386643 | PI4KB            | Kinase |
| V3LHS_386645 | Pi4kb            | Kinase |
| V3LHS_386647 | PI4KB            | Kinase |
| V3LHS_386661 | PRPS1            | Kinase |
| V3LHS_386663 | Prps1            | Kinase |
| V3LHS_386664 | PRPS1            | Kinase |
| V3LHS_386707 | SNRK             | Kinase |
| V3LHS_386708 | Snrk             | Kinase |
| V3LHS_386730 | ULK4             | Kinase |
| V3LHS_386731 | ULK4             | Kinase |
| V3LHS_386733 | ULK4             | Kinase |
| V3LHS_386734 | ULK4             | Kinase |
| V3LHS_386825 | MAP2K4           | Kinase |
| V3LHS_386826 | MAP2K4, MAP2K4P1 | Kinase |
| V3LHS_386892 | PAPSS1           | Kinase |
| V3LHS_386894 | PAPSS1           | Kinase |
| V3LHS_386895 | PAPSS1           | Kinase |
| V3LHS_386896 | PAPSS1           | Kinase |
| V3LHS_387079 | Cdk8, RGD1560888 | Kinase |
| V3LHS_387081 | CDK8             | Kinase |
| V3LHS_387082 | CDK8             | Kinase |
| V3LHS_387090 | DGKB             | Kinase |
| V3LHS_387092 | DGKB             | Kinase |
| V3LHS_387146 | BCR              | Kinase |
| V3LHS_387214 | Camk2g           | Kinase |



|              |              |        |
|--------------|--------------|--------|
| V3LHS_387215 | CAMK2G       | Kinase |
| V3LHS_387216 | CAMK2G       | Kinase |
| V3LHS_387217 | CAMK2G       | Kinase |
| V3LHS_387219 | CAMK2G       | Kinase |
| V3LHS_387305 | PDK3         | Kinase |
| V3LHS_387306 | DDAH1, PDK3  | Kinase |
| V3LHS_387307 | PDK3         | Kinase |
| V3LHS_387308 | PDK3         | Kinase |
| V3LHS_387328 | PKN1         | Kinase |
| V3LHS_387329 | PKN1         | Kinase |
| V3LHS_387331 | PKN1         | Kinase |
| V3LHS_387332 | PKN1         | Kinase |
| V3LHS_387357 | CDC42BPG     | Kinase |
| V3LHS_387359 | CDC42BPG     | Kinase |
| V3LHS_387446 | MYLK         | Kinase |
| V3LHS_387447 | MYLK         | Kinase |
| V3LHS_387449 | MYLK         | Kinase |
| V3LHS_387518 | LRRK1        | Kinase |
| V3LHS_387795 | RPS6KB1      | Kinase |
| V3LHS_387797 | RPS6KB1      | Kinase |
| V3LHS_387810 | LIMK2        | Kinase |
| V3LHS_387811 | LIMK2        | Kinase |
| V3LHS_387812 | LIMK2        | Kinase |
| V3LHS_387851 | Brd2         | Kinase |
| V3LHS_388172 | EPHA8        | Kinase |
| V3LHS_388788 | ULK2         | Kinase |
| V3LHS_388790 | ULK2         | Kinase |
| V3LHS_388793 | ULK2         | Kinase |
| V3LHS_388885 | PIM3         | Kinase |
| V3LHS_388886 | PIM3         | Kinase |
| V3LHS_389068 | DGUOK        | Kinase |
| V3LHS_389069 | DGUOK        | Kinase |
| V3LHS_389077 | NRBP1        | Kinase |
| V3LHS_389078 | NRBP1        | Kinase |
| V3LHS_389079 | Nrbp, NRBP1  | Kinase |
| V3LHS_389080 | NRBP1        | Kinase |
| V3LHS_389081 | NRBP1        | Kinase |
| V3LHS_389177 | ITPKC        | Kinase |
| V3LHS_389180 | ITPKC        | Kinase |
| V3LHS_389181 | Ccb12, ITPKC | Kinase |
| V3LHS_389182 | ITPKC        | Kinase |
| V3LHS_389299 | Hck          | Kinase |
| V3LHS_389302 | HCK          | Kinase |
| V3LHS_389545 | ANKK1        | Kinase |
| V3LHS_389546 | ANKK1        | Kinase |
| V3LHS_389549 | ANKK1        | Kinase |
| V3LHS_389562 | LIMK1        | Kinase |

|              |          |        |
|--------------|----------|--------|
| V3LHS_389564 | LIMK1    | Kinase |
| V3LHS_389665 | NEK6     | Kinase |
| V3LHS_389667 | NEK6     | Kinase |
| V3LHS_389670 | MAP2K3   | Kinase |
| V3LHS_389708 | EPHA7    | Kinase |
| V3LHS_389709 | EPHA7    | Kinase |
| V3LHS_389710 | EPHA7    | Kinase |
| V3LHS_389908 | IP6K1    | Kinase |
| V3LHS_389909 | IP6K1    | Kinase |
| V3LHS_389911 | Ip6k1    | Kinase |
| V3LHS_389912 | Ip6k1    | Kinase |
| V3LHS_389913 | IP6K1    | Kinase |
| V3LHS_390159 | IKBKB    | Kinase |
| V3LHS_390160 | IKBKB    | Kinase |
| V3LHS_390161 | IKBKB    | Kinase |
| V3LHS_390162 | IKBKB    | Kinase |
| V3LHS_390499 | PHKA2    | Kinase |
| V3LHS_390501 | PHKA2    | Kinase |
| V3LHS_390505 | BMP2K    | Kinase |
| V3LHS_390507 | BMP2K    | Kinase |
| V3LHS_390817 | Lats2    | Kinase |
| V3LHS_390818 | LATS2    | Kinase |
| V3LHS_390916 | MAPKAPK5 | Kinase |
| V3LHS_390919 | MAPKAPK5 | Kinase |
| V3LHS_390937 | CDK5     | Kinase |
| V3LHS_390938 | CDK5     | Kinase |
| V3LHS_390939 | CDK5     | Kinase |
| V3LHS_390942 | CDK5     | Kinase |
| V3LHS_391419 | RIOK3    | Kinase |
| V3LHS_391421 | RIOK3    | Kinase |
| V3LHS_391422 | RIOK3    | Kinase |
| V3LHS_391424 | RIOK3    | Kinase |
| V3LHS_391597 | LMTK3    | Kinase |
| V3LHS_391599 | LMTK3    | Kinase |
| V3LHS_391600 | LMTK3    | Kinase |
| V3LHS_391601 | LMTK3    | Kinase |
| V3LHS_391602 | LMTK3    | Kinase |
| V3LHS_391792 | RPS6KA3  | Kinase |
| V3LHS_391793 | RPS6KA3  | Kinase |
| V3LHS_391794 | RPS6KA3  | Kinase |
| V3LHS_391796 | RPS6KA3  | Kinase |
| V3LHS_391808 | NME3     | Kinase |
| V3LHS_391809 | NME3     | Kinase |
| V3LHS_391811 | NME3     | Kinase |
| V3LHS_391941 | AAK1     | Kinase |
| V3LHS_391942 | AAK1     | Kinase |
| V3LHS_391943 | AAK1     | Kinase |

|              |                    |        |
|--------------|--------------------|--------|
| V3LHS_392240 | MYLK2              | Kinase |
| V3LHS_392354 | SPHK2              | Kinase |
| V3LHS_392355 | SPHK2              | Kinase |
| V3LHS_392357 | SPHK2              | Kinase |
| V3LHS_392655 | BMPR2              | Kinase |
| V3LHS_392657 | BMPR2              | Kinase |
| V3LHS_392658 | Bmpr2              | Kinase |
| V3LHS_392659 | Bmpr2              | Kinase |
| V3LHS_392675 | GUK1               | Kinase |
| V3LHS_392920 | DDR1               | Kinase |
| V3LHS_392923 | DDR1               | Kinase |
| V3LHS_393095 | Dyrk3              | Kinase |
| V3LHS_393097 | DYRK3              | Kinase |
| V3LHS_393098 | DYRK3              | Kinase |
| V3LHS_393099 | DYRK3              | Kinase |
| V3LHS_393150 | PIP4K2C            | Kinase |
| V3LHS_393300 | PLK3               | Kinase |
| V3LHS_393670 | TEX14              | Kinase |
| V3LHS_393849 | MAP2K6             | Kinase |
| V3LHS_393850 | Map2k6             | Kinase |
| V3LHS_393854 | Map2k6             | Kinase |
| V3LHS_393920 | ErbB4              | Kinase |
| V3LHS_393921 | ERBB4              | Kinase |
| V3LHS_393922 | ERBB4              | Kinase |
| V3LHS_393924 | ERBB4              | Kinase |
| V3LHS_393965 | CDK11A, CDK11B     | Kinase |
| V3LHS_394078 | MST1R              | Kinase |
| V3LHS_394150 | TRIM27             | Kinase |
| V3LHS_394154 | TRIM27             | Kinase |
| V3LHS_394271 | PIK3C2B            | Kinase |
| V3LHS_394619 | CSNK1A1            | Kinase |
| V3LHS_394620 | CSNK1A1, CSNK1A1P1 | Kinase |
| V3LHS_394621 | CSNK1A1            | Kinase |
| V3LHS_394622 | CSNK1A1            | Kinase |
| V3LHS_394623 | CSNK1A1            | Kinase |
| V3LHS_395100 | PAK4               | Kinase |
| V3LHS_395103 | PAK4               | Kinase |
| V3LHS_395130 | PRKAR1B            | Kinase |
| V3LHS_395131 | PRKAR1B            | Kinase |
| V3LHS_395132 | PRKAR1B            | Kinase |
| V3LHS_395134 | PRKAR1B            | Kinase |
| V3LHS_395436 | IP6K2              | Kinase |
| V3LHS_395437 | IP6K2              | Kinase |
| V3LHS_395438 | IP6K2              | Kinase |
| V3LHS_395439 | IP6K2              | Kinase |
| V3LHS_395440 | IP6K2              | Kinase |
| V3LHS_395534 | FES                | Kinase |

|              |         |        |
|--------------|---------|--------|
| V3LHS_395595 | PRKCQ   | Kinase |
| V3LHS_395597 | PRKCQ   | Kinase |
| V3LHS_395599 | PRKCQ   | Kinase |
| V3LHS_395600 | PRKCQ   | Kinase |
| V3LHS_395601 | TLK2    | Kinase |
| V3LHS_395605 | TLK2    | Kinase |
| V3LHS_395632 | MAST1   | Kinase |
| V3LHS_395633 | MAST1   | Kinase |
| V3LHS_395634 | MAST1   | Kinase |
| V3LHS_395785 | DCLK1   | Kinase |
| V3LHS_395786 | DCLK1   | Kinase |
| V3LHS_395787 | DCLK1   | Kinase |
| V3LHS_395788 | DCLK1   | Kinase |
| V3LHS_395799 | SIK1    | Kinase |
| V3LHS_395800 | SIK1    | Kinase |
| V3LHS_395867 | DYRK4   | Kinase |
| V3LHS_395870 | DYRK4   | Kinase |
| V3LHS_395879 | PRKG1   | Kinase |
| V3LHS_396190 | NEK10   | Kinase |
| V3LHS_396191 | AGK     | Kinase |
| V3LHS_396192 | AGK     | Kinase |
| V3LHS_396194 | AGK     | Kinase |
| V3LHS_396356 | DLG1    | Kinase |
| V3LHS_396360 | DLG1    | Kinase |
| V3LHS_396361 | DLG1    | Kinase |
| V3LHS_396404 | PDGFRB  | Kinase |
| V3LHS_396405 | PDGFRB  | Kinase |
| V3LHS_396407 | PDGFRB  | Kinase |
| V3LHS_396450 | DBF4    | Kinase |
| V3LHS_396451 | DBF4    | Kinase |
| V3LHS_396452 | DBF4    | Kinase |
| V3LHS_396453 | DBF4    | Kinase |
| V3LHS_396497 | VRK2    | Kinase |
| V3LHS_396499 | VRK2    | Kinase |
| V3LHS_396500 | Vrk2    | Kinase |
| V3LHS_396501 | VRK2    | Kinase |
| V3LHS_396502 | VRK2    | Kinase |
| V3LHS_396565 | LRRK2   | Kinase |
| V3LHS_396566 | LRRK2   | Kinase |
| V3LHS_396568 | LRRK2   | Kinase |
| V3LHS_396788 | GSG2    | Kinase |
| V3LHS_396789 | GSG2    | Kinase |
| V3LHS_396791 | GSG2    | Kinase |
| V3LHS_396811 | MAP3K10 | Kinase |
| V3LHS_396814 | Map3k10 | Kinase |
| V3LHS_396815 | MAP3K10 | Kinase |
| V3LHS_396842 | SCYL3   | Kinase |

|              |                     |        |
|--------------|---------------------|--------|
| V3LHS_396843 | SCYL3               | Kinase |
| V3LHS_397203 | PTK7                | Kinase |
| V3LHS_397250 | Hipk1               | Kinase |
| V3LHS_397251 | HIPK1               | Kinase |
| V3LHS_397253 | HIPK1               | Kinase |
| V3LHS_397255 | HIPK1               | Kinase |
| V3LHS_397405 | CAMK2A              | Kinase |
| V3LHS_397879 | FPGT-TNNI3K, TNNI3K | Kinase |
| V3LHS_397880 | FPGT-TNNI3K, TNNI3K | Kinase |
| V3LHS_397886 | RET                 | Kinase |
| V3LHS_397888 | RET                 | Kinase |
| V3LHS_397889 | RET                 | Kinase |
| V3LHS_397901 | PDK2                | Kinase |
| V3LHS_397902 | Pdk2                | Kinase |
| V3LHS_397961 | CDKL5               | Kinase |
| V3LHS_397964 | CDKL5               | Kinase |
| V3LHS_398219 | MAGI3               | Kinase |
| V3LHS_398221 | MAGI3               | Kinase |
| V3LHS_398222 | MAGI3               | Kinase |
| V3LHS_398223 | MAGI3               | Kinase |
| V3LHS_398340 | STK39, Tktl2        | Kinase |
| V3LHS_398341 | STK39               | Kinase |
| V3LHS_398343 | STK39               | Kinase |
| V3LHS_398344 | STK39               | Kinase |
| V3LHS_398357 | CSNK1G1             | Kinase |
| V3LHS_398359 | CSNK1G1             | Kinase |
| V3LHS_398361 | CSNK1G1             | Kinase |
| V3LHS_398482 | NME7                | Kinase |
| V3LHS_398483 | NME7                | Kinase |
| V3LHS_398484 | NME7                | Kinase |
| V3LHS_398711 | GSK3A               | Kinase |
| V3LHS_398713 | GSK3A               | Kinase |
| V3LHS_398776 | TTBK1               | Kinase |
| V3LHS_398777 | TTBK1               | Kinase |
| V3LHS_398779 | TTBK1               | Kinase |
| V3LHS_398780 | TTBK1               | Kinase |
| V3LHS_399018 | PRKAG2              | Kinase |
| V3LHS_399020 | PRKAG2              | Kinase |
| V3LHS_399134 | GTF2H1              | Kinase |
| V3LHS_399136 | GTF2H1              | Kinase |
| V3LHS_399137 | GTF2H1              | Kinase |
| V3LHS_399287 | ITPKB               | Kinase |
| V3LHS_399289 | ITPKB               | Kinase |
| V3LHS_399291 | ITPKB               | Kinase |
| V3LHS_399768 | NEK2                | Kinase |
| V3LHS_399776 | PRKAG1              | Kinase |
| V3LHS_400027 | CSNK1A1L            | Kinase |

|              |          |        |
|--------------|----------|--------|
| V3LHS_400028 | CSNK1A1L | Kinase |
| V3LHS_400061 | PDK4     | Kinase |
| V3LHS_400062 | PDK4     | Kinase |
| V3LHS_400065 | PDK4     | Kinase |
| V3LHS_400176 | ABL1     | Kinase |
| V3LHS_400219 | UCKL1    | Kinase |
| V3LHS_400220 | UCKL1    | Kinase |
| V3LHS_400377 | PIK3R2   | Kinase |
| V3LHS_400694 | MAP3K15  | Kinase |
| V3LHS_400830 | NUAK1    | Kinase |
| V3LHS_400914 | TSSK6    | Kinase |
| V3LHS_401207 | CDKN2D   | Kinase |
| V3LHS_401269 | TRIB3    | Kinase |
| V3LHS_401335 | CDK5R1   | Kinase |
| V3LHS_401336 | CDK5R1   | Kinase |
| V3LHS_401337 | CDK5R1   | Kinase |
| V3LHS_401342 | CKB      | Kinase |
| V3LHS_401379 | MPP2     | Kinase |
| V3LHS_401380 | MPP2     | Kinase |
| V3LHS_401607 | CALM3    | Kinase |
| V3LHS_401933 | TAOK2    | Kinase |
| V3LHS_401935 | TAOK2    | Kinase |
| V3LHS_401954 | Itpka    | Kinase |
| V3LHS_401955 | ITPKA    | Kinase |
| V3LHS_401990 | TP53RK   | Kinase |
| V3LHS_402032 | RPS6KA4  | Kinase |
| V3LHS_402033 | Rps6ka4  | Kinase |
| V3LHS_402062 | ULK1     | Kinase |
| V3LHS_402206 | CDK18    | Kinase |
| V3LHS_402249 | PRKAR2B  | Kinase |
| V3LHS_402250 | PRKAR2B  | Kinase |
| V3LHS_402251 | PRKAR2B  | Kinase |
| V3LHS_402274 | UCK1     | Kinase |
| V3LHS_402352 | BRD2     | Kinase |
| V3LHS_402390 | CDADC1   | Kinase |
| V3LHS_402448 | PGK2     | Kinase |
| V3LHS_402646 | ITK      | Kinase |
| V3LHS_402647 | ITK      | Kinase |
| V3LHS_402648 | ITK      | Kinase |
| V3LHS_402698 | ITPK1    | Kinase |
| V3LHS_402727 | CERK     | Kinase |
| V3LHS_402728 | CERK     | Kinase |
| V3LHS_402744 | TPK1     | Kinase |
| V3LHS_402745 | TPK1     | Kinase |
| V3LHS_402746 | TPK1     | Kinase |
| V3LHS_402905 | CDKN1A   | Kinase |
| V3LHS_403015 | PTK2B    | Kinase |

|              |          |        |
|--------------|----------|--------|
| V3LHS_403016 | PTK2B    | Kinase |
| V3LHS_403039 | LTK      | Kinase |
| V3LHS_403155 | NME4     | Kinase |
| V3LHS_403165 | PANK1    | Kinase |
| V3LHS_403166 | PANK1    | Kinase |
| V3LHS_403167 | PANK1    | Kinase |
| V3LHS_403398 | ACVR2A   | Kinase |
| V3LHS_403516 | CDC42BPB | Kinase |
| V3LHS_403697 | RIPK4    | Kinase |
| V3LHS_403698 | RIPK4    | Kinase |
| V3LHS_403699 | RIPK4    | Kinase |
| V3LHS_403700 | RIPK4    | Kinase |
| V3LHS_403789 | PAK7     | Kinase |
| V3LHS_403790 | PAK7     | Kinase |
| V3LHS_403791 | PAK7     | Kinase |
| V3LHS_403985 | STK33    | Kinase |
| V3LHS_403987 | STK33    | Kinase |
| V3LHS_404030 | AXL      | Kinase |
| V3LHS_404082 | CDK6     | Kinase |
| V3LHS_404083 | CDK6     | Kinase |
| V3LHS_404085 | CDK6     | Kinase |
| V3LHS_404106 | MAP3K8   | Kinase |
| V3LHS_404107 | MAP3K8   | Kinase |
| V3LHS_404156 | AK3      | Kinase |
| V3LHS_404158 | AK3      | Kinase |
| V3LHS_404232 | TPD52L3  | Kinase |
| V3LHS_404475 | MAPKAPK3 | Kinase |
| V3LHS_404618 | SIK2     | Kinase |
| V3LHS_404654 | TPD52L3  | Kinase |
| V3LHS_405001 | TYRO3    | Kinase |
| V3LHS_405002 | TYRO3    | Kinase |
| V3LHS_405119 | ZAK      | Kinase |
| V3LHS_405147 | PKLR     | Kinase |
| V3LHS_405148 | PKLR     | Kinase |
| V3LHS_405278 | TRIB1    | Kinase |
| V3LHS_405354 | PFKFB3   | Kinase |
| V3LHS_405388 | EFNA4    | Kinase |
| V3LHS_405389 | EFNA4    | Kinase |
| V3LHS_405554 | RPS6KA1  | Kinase |
| V3LHS_405616 | MAPK11   | Kinase |
| V3LHS_405620 | PRKAB2   | Kinase |
| V3LHS_405722 | BMPR1A   | Kinase |
| V3LHS_405736 | PANK4    | Kinase |
| V3LHS_405802 | STK25    | Kinase |
| V3LHS_405883 | MAPKAPK2 | Kinase |
| V3LHS_405991 | NLK      | Kinase |
| V3LHS_406223 | IP6K3    | Kinase |

|              |                |        |
|--------------|----------------|--------|
| V3LHS_406309 | ALPK3          | Kinase |
| V3LHS_406362 | MAGI1          | Kinase |
| V3LHS_406386 | Csnk2a2        | Kinase |
| V3LHS_406466 | FAM227B, GALK2 | Kinase |
| V3LHS_406534 | PDGFRA         | Kinase |
| V3LHS_406746 | NUAK2          | Kinase |
| V3LHS_406747 | AKIP1, NUAK2   | Kinase |
| V3LHS_406932 | CKS1B          | Kinase |
| V3LHS_406934 | CKS1B          | Kinase |
| V3LHS_406950 | RFK            | Kinase |
| V3LHS_406997 | STK19          | Kinase |
| V3LHS_407173 | CKMT2          | Kinase |
| V3LHS_407226 | CDC7           | Kinase |
| V3LHS_407245 | CMPK1          | Kinase |
| V3LHS_407246 | CMPK1          | Kinase |
| V3LHS_407394 | CAMKK2         | Kinase |
| V3LHS_407517 | PHKG1          | Kinase |
| V3LHS_407615 | FGFRL1         | Kinase |
| V3LHS_407678 | CERK           | Kinase |
| V3LHS_408016 | Wnk2           | Kinase |
| V3LHS_408038 | IPPK           | Kinase |
| V3LHS_408227 | EPHB1          | Kinase |
| V3LHS_408228 | EPHB1          | Kinase |
| V3LHS_408333 | FUK            | Kinase |
| V3LHS_408334 | FUK            | Kinase |
| V3LHS_408336 | FUK            | Kinase |
| V3LHS_408658 | PI4K2B         | Kinase |
| V3LHS_408661 | PI4K2B         | Kinase |
| V3LHS_408741 | PRKCE          | Kinase |
| V3LHS_408815 | EGFR           | Kinase |
| V3LHS_408943 | EFNB3          | Kinase |
| V3LHS_408944 | EFNB3          | Kinase |
| V3LHS_408971 | CDKN2B         | Kinase |
| V3LHS_408972 | CDKN2B         | Kinase |
| V3LHS_409024 | PSKH1          | Kinase |
| V3LHS_409284 | BLK            | Kinase |
| V3LHS_409295 | PKDCC          | Kinase |
| V3LHS_409296 | PKDCC          | Kinase |
| V3LHS_409421 | PBK            | Kinase |
| V3LHS_409422 | PBK            | Kinase |
| V3LHS_409515 | SNRK           | Kinase |
| V3LHS_409516 | SNRK           | Kinase |
| V3LHS_409613 | BCKDK          | Kinase |
| V3LHS_409632 | CPNE3, ZNF677  | Kinase |
| V3LHS_409797 | ACVR1          | Kinase |
| V3LHS_409798 | ACVR1          | Kinase |
| V3LHS_409799 | ACVR1          | Kinase |



|              |             |        |
|--------------|-------------|--------|
| V3LHS_409816 | MYLK4       | Kinase |
| V3LHS_409946 | LCK         | Kinase |
| V3LHS_409970 | PRKY        | Kinase |
| V3LHS_409972 | PRKY        | Kinase |
| V3LHS_409983 | IRAK1       | Kinase |
| V3LHS_410082 | Kcnh2       | Kinase |
| V3LHS_410087 | DGKD        | Kinase |
| V3LHS_410092 | PDIK1L      | Kinase |
| V3LHS_410093 | PDIK1L      | Kinase |
| V3LHS_410095 | PDIK1L      | Kinase |
| V3LHS_410110 | CKS2        | Kinase |
| V3LHS_410198 | SHPK, TRPV1 | Kinase |
| V3LHS_410199 | CDK10       | Kinase |
| V3LHS_410219 | CDKN1B      | Kinase |
| V3LHS_410220 | Cdkn1b      | Kinase |
| V3LHS_410230 | TK2         | Kinase |
| V3LHS_410309 | PCK2        | Kinase |
| V3LHS_410614 | CIB2        | Kinase |
| V3LHS_410717 | TSSK3       | Kinase |
| V3LHS_410718 | TSSK3       | Kinase |
| V3LHS_410887 | EFNA3       | Kinase |
| V3LHS_410897 | PCK1        | Kinase |
| V3LHS_410973 | GAK         | Kinase |
| V3LHS_410974 | GAK         | Kinase |
| V3LHS_411242 | NADK        | Kinase |
| V3LHS_411437 | ADPGK       | Kinase |
| V3LHS_411537 | TSSK1B      | Kinase |
| V3LHS_411590 | PIM2        | Kinase |
| V3LHS_411593 | PIM2        | Kinase |
| V3LHS_411836 | AK4         | Kinase |
| V3LHS_411837 | AK4         | Kinase |
| V3LHS_411838 | AK4         | Kinase |
| V3LHS_412361 | MAP3K9      | Kinase |
| V3LHS_412513 | PAPSS1      | Kinase |
| V3LHS_412645 | RPS6KB1     | Kinase |
| V3LHS_412646 | RPS6KB1     | Kinase |
| V3LHS_412826 | DGUOK       | Kinase |
| V3LHS_412827 | DGUOK       | Kinase |
| V3LHS_412893 | CDK17       | Kinase |
| V3LHS_412895 | CDK17       | Kinase |
| V3LHS_412924 | LIMK1       | Kinase |
| V3LHS_412937 | FGFR3       | Kinase |
| V3LHS_412939 | FGFR3       | Kinase |
| V3LHS_412995 | IKBKB       | Kinase |
| V3LHS_413105 | LATS2       | Kinase |
| V3LHS_413262 | CKMT1B      | Kinase |
| V3LHS_413322 | MYLK2       | Kinase |

|              |                 |        |
|--------------|-----------------|--------|
| V3LHS_413402 | GUK1            | Kinase |
| V3LHS_413445 | DDR1            | Kinase |
| V3LHS_413482 | PIP4K2C         | Kinase |
| V3LHS_413770 | DAPK1           | Kinase |
| V3LHS_413985 | MAP3K10         | Kinase |
| V3LHS_413990 | SCYL3           | Kinase |
| V3LHS_413992 | SCYL3           | Kinase |
| V3LHS_413993 | SCYL3           | Kinase |
| V3LHS_414107 | RPS6KA2         | Kinase |
| V3LHS_414215 | CSNK1G1         | Kinase |
| V3LHS_414218 | STK16           | Kinase |
| V3LHS_414228 | NME7            | Kinase |
| V3LHS_414234 | CAMK1G          | Kinase |
| V3LHS_414235 | CAMK1G          | Kinase |
| V3LHS_633760 | RELA            | Kinase |
| V3LHS_633761 | Rela            | Kinase |
| V3LHS_633762 | RELA            | Kinase |
| V3LHS_633764 | RELA            | Kinase |
| V3LHS_633766 | RELA            | Kinase |
| V3LHS_633767 | Rela            | Kinase |
| V3LHS_633768 | RELA            | Kinase |
| V3LHS_633781 | NEK2            | Kinase |
| V3LHS_633783 | NEK2            | Kinase |
| V3LHS_633785 | NEK2            | Kinase |
| V3LHS_633786 | NEK2            | Kinase |
| V3LHS_633787 | STK10           | Kinase |
| V3LHS_633788 | STK10           | Kinase |
| V3LHS_633789 | STK10           | Kinase |
| V3LHS_633790 | STK10           | Kinase |
| V3LHS_633792 | STK10           | Kinase |
| V3LHS_633793 | STK10           | Kinase |
| V3LHS_633839 | SRMS            | Kinase |
| V3LHS_633840 | SRMS            | Kinase |
| V3LHS_633842 | SRMS            | Kinase |
| V3LHS_633843 | SRMS            | Kinase |
| V3LHS_633844 | SRMS            | Kinase |
| V3LHS_633847 | LOC684112, SIK3 | Kinase |
| V3LHS_633848 | SIK3            | Kinase |
| V3LHS_633850 | SIK3            | Kinase |
| V3LHS_633851 | SIK3            | Kinase |
| V3LHS_633864 | TEC             | Kinase |
| V3LHS_633865 | TEC             | Kinase |
| V3LHS_633867 | TEC             | Kinase |
| V3LHS_633868 | TEC             | Kinase |
| V3LHS_633869 | TEC             | Kinase |
| V3LHS_633870 | Tec             | Kinase |
| V3LHS_633871 | TEC             | Kinase |

|              |             |        |
|--------------|-------------|--------|
| V3LHS_633967 | FLT1        | Kinase |
| V3LHS_633972 | Atr         | Kinase |
| V3LHS_633973 | ATR         | Kinase |
| V3LHS_633974 | ATR         | Kinase |
| V3LHS_633975 | ATR         | Kinase |
| V3LHS_633977 | PRKG2       | Kinase |
| V3LHS_633978 | PRKG2       | Kinase |
| V3LHS_633979 | PRKG2       | Kinase |
| V3LHS_633980 | PRKG2       | Kinase |
| V3LHS_633981 | PRKG2       | Kinase |
| V3LHS_633983 | Prkg2       | Kinase |
| V3LHS_633984 | PRKG2       | Kinase |
| V3LHS_634037 | EPHB3       | Kinase |
| V3LHS_634039 | EPHB3       | Kinase |
| V3LHS_634041 | EPHB3       | Kinase |
| V3LHS_634044 | EPHB3       | Kinase |
| V3LHS_634088 | ADCK4       | Kinase |
| V3LHS_634089 | ADCK4       | Kinase |
| V3LHS_634090 | ADCK4       | Kinase |
| V3LHS_634114 | RAF1        | Kinase |
| V3LHS_634115 | RAF1        | Kinase |
| V3LHS_634117 | RAF1, RAP1A | Kinase |
| V3LHS_634119 | MKNK2       | Kinase |
| V3LHS_634120 | MKNK2       | Kinase |
| V3LHS_634121 | MKNK2       | Kinase |
| V3LHS_634122 | MKNK2       | Kinase |
| V3LHS_634124 | MKNK2       | Kinase |
| V3LHS_634127 | MKNK2       | Kinase |
| V3LHS_634173 | ACVR1C      | Kinase |
| V3LHS_634174 | ACVR1C      | Kinase |
| V3LHS_634176 | ACVR1C      | Kinase |
| V3LHS_634178 | ACVR1C      | Kinase |
| V3LHS_634179 | ACVR1C      | Kinase |
| V3LHS_634226 | EXOSC10     | Kinase |
| V3LHS_634227 | EXOSC10     | Kinase |
| V3LHS_634230 | EXOSC10     | Kinase |
| V3LHS_634283 | EPHA10      | Kinase |
| V3LHS_634284 | EPHA10      | Kinase |
| V3LHS_634286 | EPHA10      | Kinase |
| V3LHS_634287 | EPHA10      | Kinase |
| V3LHS_634296 | PLK2        | Kinase |
| V3LHS_634339 | MOS         | Kinase |
| V3LHS_634342 | MOS         | Kinase |
| V3LHS_634343 | MOS         | Kinase |
| V3LHS_634344 | MOS         | Kinase |
| V3LHS_634345 | MOS         | Kinase |
| V3LHS_634348 | MOS         | Kinase |

|              |                     |        |
|--------------|---------------------|--------|
| V3LHS_634375 | ROR1                | Kinase |
| V3LHS_634376 | ROR1                | Kinase |
| V3LHS_634378 | ROR1                | Kinase |
| V3LHS_634380 | Ror1                | Kinase |
| V3LHS_634381 | ROR1                | Kinase |
| V3LHS_634382 | SRPK3               | Kinase |
| V3LHS_634383 | Srpk1, Srpk2, SRPK3 | Kinase |
| V3LHS_634385 | SRPK3               | Kinase |
| V3LHS_634386 | SRPK3               | Kinase |
| V3LHS_634387 | Srpk2, SRPK3        | Kinase |
| V3LHS_634388 | SRPK3               | Kinase |
| V3LHS_634400 | CDK3                | Kinase |
| V3LHS_634401 | CDK3                | Kinase |
| V3LHS_634402 | CDK3                | Kinase |
| V3LHS_634404 | CDK3                | Kinase |
| V3LHS_634405 | CDK3                | Kinase |
| V3LHS_634407 | CDK3                | Kinase |
| V3LHS_634408 | MAP3K15             | Kinase |
| V3LHS_634410 | MAP3K15             | Kinase |
| V3LHS_634412 | MAP3K15             | Kinase |
| V3LHS_634415 | MAP3K15             | Kinase |
| V3LHS_634524 | NUAK1               | Kinase |
| V3LHS_634526 | NUAK1               | Kinase |
| V3LHS_634529 | NUAK1               | Kinase |
| V3LHS_634584 | TSSK6               | Kinase |
| V3LHS_634587 | TSSK6               | Kinase |
| V3LHS_634590 | TSSK6               | Kinase |
| V3LHS_634592 | MAPK3               | Kinase |
| V3LHS_634594 | MAPK3               | Kinase |
| V3LHS_634595 | MAPK3               | Kinase |
| V3LHS_634596 | MAPK3               | Kinase |
| V3LHS_634597 | MAPK3               | Kinase |
| V3LHS_634598 | MAPK3               | Kinase |
| V3LHS_634635 | Ntrk3               | Kinase |
| V3LHS_634636 | NTRK3               | Kinase |
| V3LHS_634638 | FGFR1               | Kinase |
| V3LHS_634640 | FGFR1               | Kinase |
| V3LHS_634641 | FGFR1               | Kinase |
| V3LHS_634642 | FGFR1               | Kinase |
| V3LHS_634644 | FGFR1               | Kinase |
| V3LHS_634645 | FGFR1               | Kinase |
| V3LHS_634747 | CAMK2A              | Kinase |
| V3LHS_634748 | CAMK2A              | Kinase |
| V3LHS_634749 | CAMK2A              | Kinase |
| V3LHS_634750 | CAMK2A              | Kinase |
| V3LHS_634751 | CAMK2A              | Kinase |
| V3LHS_634780 | STK36               | Kinase |

|              |         |        |
|--------------|---------|--------|
| V3LHS_634781 | STK36   | Kinase |
| V3LHS_634785 | STK36   | Kinase |
| V3LHS_634829 | TRIB3   | Kinase |
| V3LHS_634836 | TRIB3   | Kinase |
| V3LHS_634845 | CDK16   | Kinase |
| V3LHS_634847 | CDK16   | Kinase |
| V3LHS_634848 | CDK16   | Kinase |
| V3LHS_634849 | CDK16   | Kinase |
| V3LHS_634852 | CDK16   | Kinase |
| V3LHS_634861 | NRK     | Kinase |
| V3LHS_634864 | NRK     | Kinase |
| V3LHS_634868 | NRK     | Kinase |
| V3LHS_634902 | FYN     | Kinase |
| V3LHS_634903 | FYN     | Kinase |
| V3LHS_634905 | FYN     | Kinase |
| V3LHS_634906 | FYN     | Kinase |
| V3LHS_634927 | MAP3K11 | Kinase |
| V3LHS_634929 | MAP3K11 | Kinase |
| V3LHS_634932 | MAP3K11 | Kinase |
| V3LHS_634934 | MAP3K11 | Kinase |
| V3LHS_634986 | Grk5    | Kinase |
| V3LHS_634988 | GRK5    | Kinase |
| V3LHS_634989 | GRK5    | Kinase |
| V3LHS_634990 | GRK5    | Kinase |
| V3LHS_635000 | Prkcz   | Kinase |
| V3LHS_635002 | MTOR    | Kinase |
| V3LHS_635005 | MTOR    | Kinase |
| V3LHS_635007 | MTOR    | Kinase |
| V3LHS_635008 | MTOR    | Kinase |
| V3LHS_635046 | PKMYT1  | Kinase |
| V3LHS_635047 | PKMYT1  | Kinase |
| V3LHS_635050 | PKMYT1  | Kinase |
| V3LHS_635130 | RIOK2   | Kinase |
| V3LHS_635132 | RIOK2   | Kinase |
| V3LHS_635133 | RIOK2   | Kinase |
| V3LHS_635135 | RIOK2   | Kinase |
| V3LHS_635137 | RIOK2   | Kinase |
| V3LHS_635169 | RIPK2   | Kinase |
| V3LHS_635170 | RIPK2   | Kinase |
| V3LHS_635233 | CLK4    | Kinase |
| V3LHS_635234 | CLK4    | Kinase |
| V3LHS_635236 | Clk4    | Kinase |
| V3LHS_635240 | CLK4    | Kinase |
| V3LHS_635241 | CLK4    | Kinase |
| V3LHS_635339 | ERBB2   | Kinase |
| V3LHS_635340 | ERBB2   | Kinase |
| V3LHS_635341 | ERBB2   | Kinase |

|              |             |        |
|--------------|-------------|--------|
| V3LHS_635342 | ERBB2       | Kinase |
| V3LHS_635343 | ERBB2       | Kinase |
| V3LHS_635344 | ERBB2       | Kinase |
| V3LHS_635374 | Clk2, CLK2P | Kinase |
| V3LHS_635378 | CLK2        | Kinase |
| V3LHS_635379 | CLK2        | Kinase |
| V3LHS_635380 | Clk2, CLK2P | Kinase |
| V3LHS_635382 | RPS6KA4     | Kinase |
| V3LHS_635384 | RPS6KA4     | Kinase |
| V3LHS_635385 | RPS6KA4     | Kinase |
| V3LHS_635386 | RPS6KA4     | Kinase |
| V3LHS_635426 | ULK1        | Kinase |
| V3LHS_635429 | ULK1        | Kinase |
| V3LHS_635431 | ULK1        | Kinase |
| V3LHS_635442 | DMPK        | Kinase |
| V3LHS_635443 | DMPK        | Kinase |
| V3LHS_635447 | DMPK        | Kinase |
| V3LHS_635466 | IRAK1       | Kinase |
| V3LHS_635467 | IRAK1       | Kinase |
| V3LHS_635468 | IRAK1       | Kinase |
| V3LHS_635469 | Irak1       | Kinase |
| V3LHS_635649 | PKN2        | Kinase |
| V3LHS_635650 | PKN2        | Kinase |
| V3LHS_635651 | PKN2        | Kinase |
| V3LHS_635653 | PKN2        | Kinase |
| V3LHS_635656 | Pkn2        | Kinase |
| V3LHS_635658 | PKN2        | Kinase |
| V3LHS_635777 | IRAK1       | Kinase |
| V3LHS_635786 | DDR2        | Kinase |
| V3LHS_635787 | DDR2        | Kinase |
| V3LHS_635792 | DDR2        | Kinase |
| V3LHS_635793 | DDR2        | Kinase |
| V3LHS_635796 | TBCK        | Kinase |
| V3LHS_635797 | TBCK        | Kinase |
| V3LHS_635798 | TBCK        | Kinase |
| V3LHS_635800 | TBCK        | Kinase |
| V3LHS_635802 | TBCK        | Kinase |
| V3LHS_635803 | TBCK        | Kinase |
| V3LHS_635840 | INSR        | Kinase |
| V3LHS_635841 | INSR        | Kinase |
| V3LHS_635842 | INSR        | Kinase |
| V3LHS_635844 | INSR        | Kinase |
| V3LHS_635845 | INSR        | Kinase |
| V3LHS_635846 | INSR        | Kinase |
| V3LHS_635847 | INSR        | Kinase |
| V3LHS_635932 | VRK3        | Kinase |
| V3LHS_635933 | VRK3        | Kinase |

|              |              |        |
|--------------|--------------|--------|
| V3LHS_635934 | VRK3         | Kinase |
| V3LHS_635936 | VRK3         | Kinase |
| V3LHS_635941 | TAF1         | Kinase |
| V3LHS_635942 | TAF1         | Kinase |
| V3LHS_635945 | TAF1         | Kinase |
| V3LHS_635990 | TNK2         | Kinase |
| V3LHS_635992 | TNK2         | Kinase |
| V3LHS_635993 | TNK2         | Kinase |
| V3LHS_635994 | TNK2         | Kinase |
| V3LHS_636032 | MAPK4        | Kinase |
| V3LHS_636034 | MAPK4        | Kinase |
| V3LHS_636036 | MAPK4        | Kinase |
| V3LHS_636038 | MAPK4        | Kinase |
| V3LHS_636049 | TWF2         | Kinase |
| V3LHS_636050 | TWF2         | Kinase |
| V3LHS_636051 | TWF2         | Kinase |
| V3LHS_636052 | TWF2         | Kinase |
| V3LHS_636056 | TWF2         | Kinase |
| V3LHS_636066 | EPHA2        | Kinase |
| V3LHS_636070 | EPHA2        | Kinase |
| V3LHS_636154 | PTK2B        | Kinase |
| V3LHS_636155 | PTK2B        | Kinase |
| V3LHS_636158 | Ptk2b        | Kinase |
| V3LHS_636159 | PTK2B        | Kinase |
| V3LHS_636160 | PTK2B        | Kinase |
| V3LHS_636161 | LTK          | Kinase |
| V3LHS_636164 | LTK          | Kinase |
| V3LHS_636165 | LTK          | Kinase |
| V3LHS_636167 | LTK          | Kinase |
| V3LHS_636168 | LTK          | Kinase |
| V3LHS_636218 | Map4k1       | Kinase |
| V3LHS_636220 | MAP4K1       | Kinase |
| V3LHS_636221 | MAP4K1       | Kinase |
| V3LHS_636224 | MAP4K1       | Kinase |
| V3LHS_636225 | MAP4K1       | Kinase |
| V3LHS_636280 | MAPK12       | Kinase |
| V3LHS_636282 | MAPK12       | Kinase |
| V3LHS_636283 | MAPK12       | Kinase |
| V3LHS_636284 | MAPK12       | Kinase |
| V3LHS_636287 | MAPK12       | Kinase |
| V3LHS_636312 | Grk1         | Kinase |
| V3LHS_636317 | GRK1         | Kinase |
| V3LHS_636328 | NUP62        | Kinase |
| V3LHS_636332 | IL4I1, NUP62 | Kinase |
| V3LHS_636386 | ACVR2A       | Kinase |
| V3LHS_636388 | ACVR2A       | Kinase |
| V3LHS_636391 | ACVR2A       | Kinase |

|              |                     |        |
|--------------|---------------------|--------|
| V3LHS_636393 | Acvr2a              | Kinase |
| V3LHS_636396 | AKT2                | Kinase |
| V3LHS_636398 | AKT2                | Kinase |
| V3LHS_636400 | AKT2                | Kinase |
| V3LHS_636452 | HIPK3               | Kinase |
| V3LHS_636454 | HIPK3               | Kinase |
| V3LHS_636456 | HIPK3               | Kinase |
| V3LHS_636457 | HIPK3               | Kinase |
| V3LHS_636459 | HIPK3               | Kinase |
| V3LHS_636460 | Hipk3               | Kinase |
| V3LHS_636498 | BRD4                | Kinase |
| V3LHS_636499 | Brd4                | Kinase |
| V3LHS_636500 | BRD4                | Kinase |
| V3LHS_636501 | BRD4                | Kinase |
| V3LHS_636503 | BRD4                | Kinase |
| V3LHS_636538 | RPS6KC1             | Kinase |
| V3LHS_636539 | RPS6KC1             | Kinase |
| V3LHS_636540 | RPS6KC1             | Kinase |
| V3LHS_636542 | RPS6KC1             | Kinase |
| V3LHS_636592 | RIPK4               | Kinase |
| V3LHS_636593 | RIPK4               | Kinase |
| V3LHS_636596 | RIPK4               | Kinase |
| V3LHS_636598 | RIPK4               | Kinase |
| V3LHS_636602 | PIK3R1              | Kinase |
| V3LHS_636604 | PIK3R1              | Kinase |
| V3LHS_636623 | MAP3K6              | Kinase |
| V3LHS_636625 | MAP3K6              | Kinase |
| V3LHS_636626 | Map3k6              | Kinase |
| V3LHS_636629 | MAP3K6              | Kinase |
| V3LHS_636663 | STYK1               | Kinase |
| V3LHS_636664 | STYK1               | Kinase |
| V3LHS_636667 | STYK1               | Kinase |
| V3LHS_636688 | CDK1                | Kinase |
| V3LHS_636691 | CDK1                | Kinase |
| V3LHS_636710 | EPHB4               | Kinase |
| V3LHS_636711 | EPHB4               | Kinase |
| V3LHS_636712 | EPHB4               | Kinase |
| V3LHS_636713 | EPHB4               | Kinase |
| V3LHS_636714 | EPHB4               | Kinase |
| V3LHS_636728 | MST4                | Kinase |
| V3LHS_636729 | 2610018G03Rik, MST4 | Kinase |
| V3LHS_636730 | MST4                | Kinase |
| V3LHS_636731 | MST4                | Kinase |
| V3LHS_636732 | MST4                | Kinase |
| V3LHS_636735 | Sgk1                | Kinase |
| V3LHS_636738 | SGK1                | Kinase |
| V3LHS_636741 | SGK1                | Kinase |



|              |               |        |
|--------------|---------------|--------|
| V3LHS_636783 | INSRR         | Kinase |
| V3LHS_636785 | INSRR         | Kinase |
| V3LHS_636787 | INSRR         | Kinase |
| V3LHS_636789 | INSRR         | Kinase |
| V3LHS_636790 | INSRR         | Kinase |
| V3LHS_636824 | CDK6          | Kinase |
| V3LHS_636825 | CDK6          | Kinase |
| V3LHS_636826 | CDK6          | Kinase |
| V3LHS_636830 | Cdk6          | Kinase |
| V3LHS_636832 | MAP3K2        | Kinase |
| V3LHS_636834 | MAP3K2        | Kinase |
| V3LHS_636835 | MAP3K2        | Kinase |
| V3LHS_636836 | MAP3K2        | Kinase |
| V3LHS_636837 | MAP3K2        | Kinase |
| V3LHS_636839 | MAP3K2        | Kinase |
| V3LHS_636864 | FLT4          | Kinase |
| V3LHS_636866 | FLT4          | Kinase |
| V3LHS_636900 | TAF1L         | Kinase |
| V3LHS_636901 | Taf1, TAF1L   | Kinase |
| V3LHS_636902 | TAF1L         | Kinase |
| V3LHS_636903 | TAF1L         | Kinase |
| V3LHS_636906 | TAF1L         | Kinase |
| V3LHS_636907 | TAF1L         | Kinase |
| V3LHS_636908 | Taf1, TAF1L   | Kinase |
| V3LHS_636954 | Camk2b        | Kinase |
| V3LHS_636955 | RPS6KA5       | Kinase |
| V3LHS_636956 | RPS6KA5       | Kinase |
| V3LHS_636957 | RPS6KA5       | Kinase |
| V3LHS_636958 | RPS6KA5       | Kinase |
| V3LHS_636960 | RPS6KA5       | Kinase |
| V3LHS_636961 | RPS6KA5       | Kinase |
| V3LHS_637000 | ADCK1         | Kinase |
| V3LHS_637003 | ADCK1         | Kinase |
| V3LHS_637004 | ADCK1         | Kinase |
| V3LHS_637006 | ADCK1         | Kinase |
| V3LHS_637039 | HSPB8         | Kinase |
| V3LHS_637040 | HSPB8         | Kinase |
| V3LHS_637041 | HSPB8         | Kinase |
| V3LHS_637043 | HSPB8         | Kinase |
| V3LHS_637044 | HSPB8         | Kinase |
| V3LHS_637159 | SRPK2         | Kinase |
| V3LHS_637160 | SRPK2         | Kinase |
| V3LHS_637162 | CXCL12, SRPK2 | Kinase |
| V3LHS_637163 | SRPK2         | Kinase |
| V3LHS_637165 | SRPK2         | Kinase |
| V3LHS_637166 | SRPK2         | Kinase |
| V3LHS_637208 | STK35         | Kinase |

|              |               |        |
|--------------|---------------|--------|
| V3LHS_637210 | STK35         | Kinase |
| V3LHS_637211 | STK35         | Kinase |
| V3LHS_637213 | STK35         | Kinase |
| V3LHS_637214 | STK35         | Kinase |
| V3LHS_637235 | LCK           | Kinase |
| V3LHS_637236 | LCK           | Kinase |
| V3LHS_637306 | ALK           | Kinase |
| V3LHS_637307 | ALK           | Kinase |
| V3LHS_637411 | AURKC         | Kinase |
| V3LHS_637413 | AURKC         | Kinase |
| V3LHS_637416 | AURKC         | Kinase |
| V3LHS_637418 | MYO3B         | Kinase |
| V3LHS_637419 | MYO3B         | Kinase |
| V3LHS_637421 | MYO3B         | Kinase |
| V3LHS_637423 | MYO3B         | Kinase |
| V3LHS_637424 | MYO3B         | Kinase |
| V3LHS_637425 | MYO3B         | Kinase |
| V3LHS_637426 | MYO3B         | Kinase |
| V3LHS_637427 | MYO3B         | Kinase |
| V3LHS_637431 | MAP2K7        | Kinase |
| V3LHS_637432 | MAP2K7        | Kinase |
| V3LHS_637433 | MAP2K7        | Kinase |
| V3LHS_637435 | MAP2K7        | Kinase |
| V3LHS_637454 | TLK1          | Kinase |
| V3LHS_637455 | TLK1          | Kinase |
| V3LHS_637456 | TLK1          | Kinase |
| V3LHS_637461 | TLK1          | Kinase |
| V3LHS_637471 | TYRO3         | Kinase |
| V3LHS_637472 | TYRO3         | Kinase |
| V3LHS_637474 | TYRO3         | Kinase |
| V3LHS_637476 | TYRO3         | Kinase |
| V3LHS_637477 | TYRO3         | Kinase |
| V3LHS_637478 | Nlrp12, PTK2B | Kinase |
| V3LHS_637551 | EEF2K         | Kinase |
| V3LHS_637552 | EEF2K         | Kinase |
| V3LHS_637554 | EEF2K         | Kinase |
| V3LHS_637558 | EEF2K         | Kinase |
| V3LHS_637569 | CDK2          | Kinase |
| V3LHS_637571 | CDK2          | Kinase |
| V3LHS_637573 | CDK2          | Kinase |
| V3LHS_637575 | CDK2          | Kinase |
| V3LHS_637618 | PRKCD         | Kinase |
| V3LHS_637621 | PRKCD         | Kinase |
| V3LHS_637622 | PRKCD         | Kinase |
| V3LHS_637623 | PRKCD         | Kinase |
| V3LHS_637634 | NEK8          | Kinase |
| V3LHS_637635 | NEK8          | Kinase |

|              |        |        |
|--------------|--------|--------|
| V3LHS_637638 | NEK8   | Kinase |
| V3LHS_637640 | NEK8   | Kinase |
| V3LHS_637641 | NEK8   | Kinase |
| V3LHS_637693 | Sbk1   | Kinase |
| V3LHS_637694 | SBK1   | Kinase |
| V3LHS_637695 | SBK1   | Kinase |
| V3LHS_637697 | SBK1   | Kinase |
| V3LHS_637698 | Sbk1   | Kinase |
| V3LHS_637699 | SBK1   | Kinase |
| V3LHS_637700 | SBK1   | Kinase |
| V3LHS_637800 | BRSK2  | Kinase |
| V3LHS_637802 | BRSK2  | Kinase |
| V3LHS_637804 | BRSK2  | Kinase |
| V3LHS_637805 | BRSK2  | Kinase |
| V3LHS_637806 | BRSK2  | Kinase |
| V3LHS_637807 | BRSK2  | Kinase |
| V3LHS_637842 | CHEK2  | Kinase |
| V3LHS_637843 | CHEK2  | Kinase |
| V3LHS_637845 | CHEK2  | Kinase |
| V3LHS_637846 | CHEK2  | Kinase |
| V3LHS_637847 | CHEK2  | Kinase |
| V3LHS_637848 | CHEK2  | Kinase |
| V3LHS_637849 | CHEK2  | Kinase |
| V3LHS_637954 | CHEK1  | Kinase |
| V3LHS_637955 | CHEK1  | Kinase |
| V3LHS_637956 | CHEK1  | Kinase |
| V3LHS_637957 | CHEK1  | Kinase |
| V3LHS_637959 | CHEK1  | Kinase |
| V3LHS_638000 | MAPK11 | Kinase |
| V3LHS_638001 | MAPK11 | Kinase |
| V3LHS_638003 | MAPK11 | Kinase |
| V3LHS_638007 | MAPK11 | Kinase |
| V3LHS_638034 | RIPK1  | Kinase |
| V3LHS_638036 | RIPK1  | Kinase |
| V3LHS_638037 | RIPK1  | Kinase |
| V3LHS_638038 | RIPK1  | Kinase |
| V3LHS_638040 | RIPK1  | Kinase |
| V3LHS_638124 | STK40  | Kinase |
| V3LHS_638126 | STK40  | Kinase |
| V3LHS_638128 | STK40  | Kinase |
| V3LHS_638129 | STK40  | Kinase |
| V3LHS_638130 | STK40  | Kinase |
| V3LHS_638295 | RIPK3  | Kinase |
| V3LHS_638296 | RIPK3  | Kinase |
| V3LHS_638298 | RIPK3  | Kinase |
| V3LHS_638300 | RIPK3  | Kinase |
| V3LHS_638301 | RIPK3  | Kinase |

|              |                 |        |
|--------------|-----------------|--------|
| V3LHS_638352 | STK32A          | Kinase |
| V3LHS_638354 | STK32A          | Kinase |
| V3LHS_638355 | STK32A          | Kinase |
| V3LHS_638359 | STK32A          | Kinase |
| V3LHS_638360 | STK32A          | Kinase |
| V3LHS_638362 | CLK3            | Kinase |
| V3LHS_638366 | CLK3            | Kinase |
| V3LHS_638426 | GRK6            | Kinase |
| V3LHS_638427 | Grk6            | Kinase |
| V3LHS_638430 | GRK6            | Kinase |
| V3LHS_638454 | MYO3A           | Kinase |
| V3LHS_638455 | MYO3A           | Kinase |
| V3LHS_638456 | MYO3A           | Kinase |
| V3LHS_638457 | MYO3A           | Kinase |
| V3LHS_638458 | MYO3A           | Kinase |
| V3LHS_638459 | MYO3A           | Kinase |
| V3LHS_638500 | AURKA, AURKAPS1 | Kinase |
| V3LHS_638501 | AURKA           | Kinase |
| V3LHS_638502 | AURKA           | Kinase |
| V3LHS_638503 | AURKA           | Kinase |
| V3LHS_638505 | AURKA, AURKAPS1 | Kinase |
| V3LHS_638542 | MAPK6           | Kinase |
| V3LHS_638546 | Mapk6           | Kinase |
| V3LHS_638548 | MAPK6           | Kinase |
| V3LHS_638550 | MAPK6           | Kinase |
| V3LHS_638551 | MAPK6           | Kinase |
| V3LHS_638589 | CLK1, PPIL3     | Kinase |
| V3LHS_638590 | CLK1            | Kinase |
| V3LHS_638591 | CLK1, PPIL3     | Kinase |
| V3LHS_638592 | CLK1            | Kinase |
| V3LHS_638593 | CLK1, PPIL3     | Kinase |
| V3LHS_638622 | RNASEL          | Kinase |
| V3LHS_638623 | RNASEL          | Kinase |
| V3LHS_638624 | RNASEL          | Kinase |
| V3LHS_638625 | RNASEL          | Kinase |
| V3LHS_638626 | RNASEL          | Kinase |
| V3LHS_638627 | RNASEL          | Kinase |
| V3LHS_638674 | CSNK2A2         | Kinase |
| V3LHS_638675 | CSNK2A2         | Kinase |
| V3LHS_638676 | CSNK2A2         | Kinase |
| V3LHS_638677 | CSNK2A2         | Kinase |
| V3LHS_638679 | CSNK2A2         | Kinase |
| V3LHS_638681 | RPS6KL1         | Kinase |
| V3LHS_638684 | RPS6KL1         | Kinase |
| V3LHS_638685 | RPS6KL1         | Kinase |
| V3LHS_638687 | RPS6KL1         | Kinase |
| V3LHS_638697 | LMTK2           | Kinase |

|              |                |        |
|--------------|----------------|--------|
| V3LHS_638698 | LMTK2          | Kinase |
| V3LHS_638703 | LMTK2          | Kinase |
| V3LHS_638705 | LMTK2          | Kinase |
| V3LHS_638707 | SLK            | Kinase |
| V3LHS_638709 | SLK            | Kinase |
| V3LHS_638710 | SLK            | Kinase |
| V3LHS_638712 | SLK            | Kinase |
| V3LHS_638745 | BMPR1B         | Kinase |
| V3LHS_638747 | BMPR1B         | Kinase |
| V3LHS_638748 | BMPR1B         | Kinase |
| V3LHS_638752 | BMPR1B         | Kinase |
| V3LHS_638754 | Prkd2          | Kinase |
| V3LHS_638757 | PRKD2          | Kinase |
| V3LHS_638759 | PRKD2          | Kinase |
| V3LHS_638761 | EIF2AK1        | Kinase |
| V3LHS_638763 | EIF2AK1        | Kinase |
| V3LHS_638766 | EIF2AK1        | Kinase |
| V3LHS_638768 | EIF2AK1        | Kinase |
| V3LHS_638787 | PHKG2          | Kinase |
| V3LHS_638788 | PHKG2          | Kinase |
| V3LHS_638790 | PHKG2          | Kinase |
| V3LHS_638791 | PHKG2          | Kinase |
| V3LHS_638793 | PHKG2          | Kinase |
| V3LHS_638803 | Brd3           | Kinase |
| V3LHS_638805 | BRD3           | Kinase |
| V3LHS_638807 | BRD3           | Kinase |
| V3LHS_638848 | SCYL1          | Kinase |
| V3LHS_638849 | SCYL1          | Kinase |
| V3LHS_638852 | SCYL1          | Kinase |
| V3LHS_638854 | SCYL1          | Kinase |
| V3LHS_638883 | AATK           | Kinase |
| V3LHS_638884 | AATK           | Kinase |
| V3LHS_638885 | AATK           | Kinase |
| V3LHS_638887 | AATK           | Kinase |
| V3LHS_638888 | AATK           | Kinase |
| V3LHS_638889 | Aatk           | Kinase |
| V3LHS_638890 | AATK           | Kinase |
| V3LHS_638901 | GUCY2D         | Kinase |
| V3LHS_638902 | GUCY2D         | Kinase |
| V3LHS_638904 | GUCY2D, Gucy2e | Kinase |
| V3LHS_638906 | GUCY2D         | Kinase |
| V3LHS_638934 | NUAK2          | Kinase |
| V3LHS_638937 | NUAK2          | Kinase |
| V3LHS_638944 | Csnk1d         | Kinase |
| V3LHS_638945 | CSNK1D         | Kinase |
| V3LHS_638946 | CSNK1D         | Kinase |
| V3LHS_638947 | Csnk1d         | Kinase |

|              |         |        |
|--------------|---------|--------|
| V3LHS_638958 | SGK223  | Kinase |
| V3LHS_638959 | SGK223  | Kinase |
| V3LHS_638960 | SGK223  | Kinase |
| V3LHS_638961 | SGK223  | Kinase |
| V3LHS_638962 | SGK223  | Kinase |
| V3LHS_638964 | SGK223  | Kinase |
| V3LHS_638992 | WNK1    | Kinase |
| V3LHS_638993 | WNK1    | Kinase |
| V3LHS_638994 | WNK1    | Kinase |
| V3LHS_638999 | WNK1    | Kinase |
| V3LHS_639000 | STK11   | Kinase |
| V3LHS_639003 | STK11   | Kinase |
| V3LHS_639062 | ROR1    | Kinase |
| V3LHS_639063 | Ror1    | Kinase |
| V3LHS_639064 | ROR1    | Kinase |
| V3LHS_639083 | CDK12   | Kinase |
| V3LHS_639085 | CDK12   | Kinase |
| V3LHS_639086 | CDK12   | Kinase |
| V3LHS_639087 | CDK12   | Kinase |
| V3LHS_639089 | CDK12   | Kinase |
| V3LHS_639143 | RPS6KB2 | Kinase |
| V3LHS_639145 | RPS6KB2 | Kinase |
| V3LHS_639146 | RPS6KB2 | Kinase |
| V3LHS_639149 | BTK     | Kinase |
| V3LHS_639151 | BTK     | Kinase |
| V3LHS_639152 | BTK     | Kinase |
| V3LHS_639153 | BTK     | Kinase |
| V3LHS_639154 | BTK     | Kinase |
| V3LHS_639157 | STK19   | Kinase |
| V3LHS_639158 | STK19   | Kinase |
| V3LHS_639159 | STK19   | Kinase |
| V3LHS_639160 | STK19   | Kinase |
| V3LHS_639173 | EIF2AK3 | Kinase |
| V3LHS_639174 | EIF2AK3 | Kinase |
| V3LHS_639175 | EIF2AK3 | Kinase |
| V3LHS_639176 | EIF2AK3 | Kinase |
| V3LHS_639177 | EIF2AK3 | Kinase |
| V3LHS_639179 | EIF2AK3 | Kinase |
| V3LHS_639180 | EIF2AK3 | Kinase |
| V3LHS_639241 | TAB1    | Kinase |
| V3LHS_639242 | TAB1    | Kinase |
| V3LHS_639244 | TAB1    | Kinase |
| V3LHS_639245 | TAB1    | Kinase |
| V3LHS_639248 | TAB1    | Kinase |
| V3LHS_639261 | AMHR2   | Kinase |
| V3LHS_639263 | AMHR2   | Kinase |
| V3LHS_639264 | AMHR2   | Kinase |

|              |                   |        |
|--------------|-------------------|--------|
| V3LHS_639265 | AMHR2             | Kinase |
| V3LHS_639289 | SGK2              | Kinase |
| V3LHS_639290 | SGK2              | Kinase |
| V3LHS_639292 | SGK2              | Kinase |
| V3LHS_639293 | SGK2              | Kinase |
| V3LHS_639294 | SGK2              | Kinase |
| V3LHS_639295 | SGK2              | Kinase |
| V3LHS_639296 | SGK2              | Kinase |
| V3LHS_639424 | TGFBR2            | Kinase |
| V3LHS_639425 | TGFBR2            | Kinase |
| V3LHS_639427 | TGFBR2            | Kinase |
| V3LHS_639470 | EPHA3             | Kinase |
| V3LHS_639471 | EPHA3             | Kinase |
| V3LHS_639472 | EPHA3             | Kinase |
| V3LHS_639473 | EPHA3             | Kinase |
| V3LHS_639475 | EPHA3             | Kinase |
| V3LHS_639519 | PHKG1             | Kinase |
| V3LHS_639521 | PHKG1             | Kinase |
| V3LHS_639522 | PHKG1             | Kinase |
| V3LHS_639523 | PHKG1             | Kinase |
| V3LHS_639524 | PHKG1             | Kinase |
| V3LHS_639526 | PHKG1             | Kinase |
| V3LHS_639537 | PRKAB1            | Kinase |
| V3LHS_639538 | PRKAB1            | Kinase |
| V3LHS_639540 | Prkab1            | Kinase |
| V3LHS_639541 | PRKAB1            | Kinase |
| V3LHS_639542 | PRKAB1            | Kinase |
| V3LHS_639544 | PRKAB1            | Kinase |
| V3LHS_639719 | IKBKE             | Kinase |
| V3LHS_639720 | IKBKE             | Kinase |
| V3LHS_639721 | IKBKE             | Kinase |
| V3LHS_639722 | IKBKE             | Kinase |
| V3LHS_639723 | IKBKE             | Kinase |
| V3LHS_639725 | IKBKE             | Kinase |
| V3LHS_639726 | IKBKE             | Kinase |
| V3LHS_639743 | FASTK             | Kinase |
| V3LHS_639747 | Fastk             | Kinase |
| V3LHS_639748 | FASTK             | Kinase |
| V3LHS_639834 | LOC407835, MAP2K2 | Kinase |
| V3LHS_639835 | LOC407835, MAP2K2 | Kinase |
| V3LHS_639836 | LOC407835, MAP2K2 | Kinase |
| V3LHS_639838 | LOC407835, MAP2K2 | Kinase |
| V3LHS_639839 | LOC407835, MAP2K2 | Kinase |
| V3LHS_639850 | CSNK2A1, CSNK2A1P | Kinase |
| V3LHS_639852 | CSNK2A1, CSNK2A1P | Kinase |
| V3LHS_639854 | CSNK2A1, CSNK2A1P | Kinase |
| V3LHS_639855 | CSNK2A1, CSNK2A1P | Kinase |

|              |                   |        |
|--------------|-------------------|--------|
| V3LHS_639856 | CSNK2A1, CSNK2A1P | Kinase |
| V3LHS_639857 | Csnk2a1, CSNK2A1P | Kinase |
| V3LHS_639929 | SRC               | Kinase |
| V3LHS_639931 | SRC               | Kinase |
| V3LHS_639932 | SRC               | Kinase |
| V3LHS_639936 | SRC               | Kinase |
| V3LHS_639945 | CAMKK2            | Kinase |
| V3LHS_639946 | CAMKK2            | Kinase |
| V3LHS_639947 | CAMKK2            | Kinase |
| V3LHS_639948 | CAMKK2            | Kinase |
| V3LHS_639950 | CAMKK2            | Kinase |
| V3LHS_639952 | CAMKK2            | Kinase |
| V3LHS_639994 | CDK9              | Kinase |
| V3LHS_639996 | CDK9              | Kinase |
| V3LHS_640036 | ROCK2             | Kinase |
| V3LHS_640039 | ROCK2             | Kinase |
| V3LHS_640041 | ROCK2             | Kinase |
| V3LHS_640102 | Akt1              | Kinase |
| V3LHS_640103 | AKT1              | Kinase |
| V3LHS_640106 | AKT1              | Kinase |
| V3LHS_640108 | AKT1              | Kinase |
| V3LHS_640109 | Akt1              | Kinase |
| V3LHS_640126 | RPS6KA6           | Kinase |
| V3LHS_640127 | RPS6KA6           | Kinase |
| V3LHS_640130 | RPS6KA6           | Kinase |
| V3LHS_640132 | RPS6KA6           | Kinase |
| V3LHS_640133 | RPS6KA6           | Kinase |
| V3LHS_640135 | DAPK2             | Kinase |
| V3LHS_640136 | DAPK2             | Kinase |
| V3LHS_640139 | DAPK2             | Kinase |
| V3LHS_640140 | DAPK2             | Kinase |
| V3LHS_640141 | Dapk2             | Kinase |
| V3LHS_640233 | CAMK1D            | Kinase |
| V3LHS_640234 | CAMK1D            | Kinase |
| V3LHS_640236 | CAMK1D            | Kinase |
| V3LHS_640238 | CAMK1D            | Kinase |
| V3LHS_640239 | CAMK1D            | Kinase |
| V3LHS_640282 | PRKCE             | Kinase |
| V3LHS_640286 | PRKCE             | Kinase |
| V3LHS_640287 | PRKCE             | Kinase |
| V3LHS_640328 | PAK3              | Kinase |
| V3LHS_640331 | PAK3              | Kinase |
| V3LHS_640332 | PAK3              | Kinase |
| V3LHS_640333 | PAK3              | Kinase |
| V3LHS_640336 | PAK3              | Kinase |
| V3LHS_640337 | PAK3              | Kinase |
| V3LHS_640362 | DYRK1B            | Kinase |



|              |              |        |
|--------------|--------------|--------|
| V3LHS_640364 | DYRK1B       | Kinase |
| V3LHS_640365 | DYRK1B       | Kinase |
| V3LHS_640367 | DYRK1B       | Kinase |
| V3LHS_640368 | Dyrk1b       | Kinase |
| V3LHS_640415 | PRKACA       | Kinase |
| V3LHS_640416 | PRKACA       | Kinase |
| V3LHS_640417 | Prkaca       | Kinase |
| V3LHS_640418 | PRKACA       | Kinase |
| V3LHS_640419 | PRKACA       | Kinase |
| V3LHS_640421 | PRKACA       | Kinase |
| V3LHS_640435 | NTRK3        | Kinase |
| V3LHS_640436 | NTRK3        | Kinase |
| V3LHS_640437 | Ntrk2, NTRK3 | Kinase |
| V3LHS_640438 | NTRK3        | Kinase |
| V3LHS_640439 | NTRK3        | Kinase |
| V3LHS_640464 | FGR          | Kinase |
| V3LHS_640467 | FGR          | Kinase |
| V3LHS_640470 | FGR          | Kinase |
| V3LHS_640471 | FGR          | Kinase |
| V3LHS_640670 | PIK3CA       | Kinase |
| V3LHS_640671 | PIK3CA       | Kinase |
| V3LHS_640790 | PBK          | Kinase |
| V3LHS_640791 | PBK          | Kinase |
| V3LHS_640793 | PBK          | Kinase |
| V3LHS_640795 | PBK          | Kinase |
| V3LHS_640799 | PNCK         | Kinase |
| V3LHS_640804 | PNCK         | Kinase |
| V3LHS_640806 | PNCK         | Kinase |
| V3LHS_640807 | PNCK         | Kinase |
| V3LHS_640828 | MAPK7        | Kinase |
| V3LHS_640830 | MAPK7        | Kinase |
| V3LHS_640831 | MAPK7        | Kinase |
| V3LHS_640832 | MAPK7        | Kinase |
| V3LHS_641003 | CAMK2B       | Kinase |
| V3LHS_641004 | CAMK2B       | Kinase |
| V3LHS_641005 | CAMK2B       | Kinase |
| V3LHS_641006 | CAMK2B       | Kinase |
| V3LHS_641010 | CAMK2B       | Kinase |
| V3LHS_641011 | CAMK2B       | Kinase |
| V3LHS_641063 | MAP2K3       | Kinase |
| V3LHS_641064 | MAP2K3       | Kinase |
| V3LHS_641065 | MAP2K3       | Kinase |
| V3LHS_641071 | PTK6         | Kinase |
| V3LHS_641074 | PTK6         | Kinase |
| V3LHS_641075 | PTK6         | Kinase |
| V3LHS_641300 | STRADB       | Kinase |
| V3LHS_641301 | STRADB       | Kinase |

|              |         |        |
|--------------|---------|--------|
| V3LHS_641302 | STRADB  | Kinase |
| V3LHS_641303 | STRADB  | Kinase |
| V3LHS_641304 | STRADB  | Kinase |
| V3LHS_641305 | STRADB  | Kinase |
| V3LHS_641307 | STRADB  | Kinase |
| V3LHS_641328 | ADCK5   | Kinase |
| V3LHS_641329 | ADCK5   | Kinase |
| V3LHS_641330 | ADCK5   | Kinase |
| V3LHS_641332 | ADCK5   | Kinase |
| V3LHS_641333 | ADCK5   | Kinase |
| V3LHS_641334 | ADCK5   | Kinase |
| V3LHS_641335 | ADCK5   | Kinase |
| V3LHS_641352 | CDK10   | Kinase |
| V3LHS_641355 | CDK10   | Kinase |
| V3LHS_641356 | PIK3C3  | Kinase |
| V3LHS_641358 | PIK3C3  | Kinase |
| V3LHS_641360 | PIK3C3  | Kinase |
| V3LHS_641362 | PIK3C3  | Kinase |
| V3LHS_641373 | PIK3C2A | Kinase |
| V3LHS_641375 | PIK3C2A | Kinase |
| V3LHS_641379 | PIK3C2A | Kinase |
| V3LHS_641380 | PIK3C2A | Kinase |
| V3LHS_641441 | CSNK1G2 | Kinase |
| V3LHS_641442 | CSNK1G2 | Kinase |
| V3LHS_641443 | CSNK1G2 | Kinase |
| V3LHS_641444 | CSNK1G2 | Kinase |
| V3LHS_641463 | PRKCZ   | Kinase |
| V3LHS_641464 | PRKCZ   | Kinase |
| V3LHS_641465 | PRKCZ   | Kinase |
| V3LHS_641472 | Gucy2f  | Kinase |
| V3LHS_641479 | GUCY2F  | Kinase |
| V3LHS_641615 | PRKAG3  | Kinase |
| V3LHS_641616 | PRKAG3  | Kinase |
| V3LHS_641617 | PRKAG3  | Kinase |
| V3LHS_641618 | PRKAG3  | Kinase |
| V3LHS_641619 | PRKAG3  | Kinase |
| V3LHS_641649 | Srpk1   | Kinase |
| V3LHS_641651 | Srpk1   | Kinase |
| V3LHS_641652 | SRPK1   | Kinase |
| V3LHS_641656 | Srpk1   | Kinase |
| V3LHS_641658 | TRIB2   | Kinase |
| V3LHS_641659 | TRIB2   | Kinase |
| V3LHS_641660 | TRIB2   | Kinase |
| V3LHS_641661 | TRIB2   | Kinase |
| V3LHS_641663 | TRIB2   | Kinase |
| V3LHS_641689 | CDK4    | Kinase |
| V3LHS_641690 | CDK4    | Kinase |

|              |                        |        |
|--------------|------------------------|--------|
| V3LHS_641691 | CDK4                   | Kinase |
| V3LHS_641695 | CDK4                   | Kinase |
| V3LHS_641721 | JAK3                   | Kinase |
| V3LHS_641722 | JAK3                   | Kinase |
| V3LHS_641723 | JAK3                   | Kinase |
| V3LHS_641724 | JAK3                   | Kinase |
| V3LHS_641726 | JAK3                   | Kinase |
| V3LHS_641727 | JAK3                   | Kinase |
| V3LHS_641729 | JAK3                   | Kinase |
| V3LHS_641730 | JAK3                   | Kinase |
| V3LHS_641731 | STK32C                 | Kinase |
| V3LHS_641735 | Stk32a, Stk32b, STK32C | Kinase |
| V3LHS_641738 | STK32C                 | Kinase |
| V3LHS_641747 | MKNK2                  | Kinase |
| V3LHS_641835 | MAP3K12                | Kinase |
| V3LHS_641837 | MAP3K12                | Kinase |
| V3LHS_641838 | Map3k12                | Kinase |
| V3LHS_641839 | MAP3K12                | Kinase |
| V3LHS_641840 | MAP3K12                | Kinase |
| V3LHS_641842 | MAP3K12                | Kinase |
| V3LHS_641879 | ERN2                   | Kinase |
| V3LHS_641880 | ERN2                   | Kinase |
| V3LHS_641882 | ERN2                   | Kinase |
| V3LHS_641886 | ERN2                   | Kinase |
| V3LHS_641888 | ERN2                   | Kinase |
| V3LHS_641966 | MYLK3                  | Kinase |
| V3LHS_641967 | MYLK3                  | Kinase |
| V3LHS_641969 | MYLK3                  | Kinase |
| V3LHS_641970 | MYLK3                  | Kinase |
| V3LHS_641971 | MYLK3                  | Kinase |
| V3LHS_641972 | MYLK3                  | Kinase |
| V3LHS_641973 | MYLK3                  | Kinase |
| V3LHS_641975 | MYLK3                  | Kinase |
| V3LHS_642032 | MUSK                   | Kinase |
| V3LHS_642033 | MUSK                   | Kinase |
| V3LHS_642034 | MUSK                   | Kinase |
| V3LHS_642035 | MUSK                   | Kinase |
| V3LHS_642036 | Musk                   | Kinase |
| V3LHS_642038 | MUSK                   | Kinase |
| V3LHS_642068 | BRD4                   | Kinase |
| V3LHS_642172 | FGFR4                  | Kinase |
| V3LHS_642173 | FGFR4                  | Kinase |
| V3LHS_642174 | FGFR4                  | Kinase |
| V3LHS_642175 | FGFR4                  | Kinase |
| V3LHS_642176 | FGFR4                  | Kinase |
| V3LHS_642178 | FGFR4                  | Kinase |
| V3LHS_642221 | VRK3                   | Kinase |

|              |                  |        |
|--------------|------------------|--------|
| V3LHS_642231 | PIK3CD           | Kinase |
| V3LHS_642232 | PIK3CD           | Kinase |
| V3LHS_642235 | Pik3cd           | Kinase |
| V3LHS_642237 | PIK3CD           | Kinase |
| V3LHS_642254 | ARAF             | Kinase |
| V3LHS_642255 | ARAF             | Kinase |
| V3LHS_642257 | ARAF             | Kinase |
| V3LHS_642258 | ARAF             | Kinase |
| V3LHS_642259 | ARAF             | Kinase |
| V3LHS_642261 | Araf             | Kinase |
| V3LHS_642264 | TNK1             | Kinase |
| V3LHS_642266 | TNK1             | Kinase |
| V3LHS_642269 | TNK1             | Kinase |
| V3LHS_642302 | MAP3K13          | Kinase |
| V3LHS_642304 | MAP3K13          | Kinase |
| V3LHS_642307 | MAP3K13          | Kinase |
| V3LHS_642308 | MAP3K13          | Kinase |
| V3LHS_642310 | MAP3K13          | Kinase |
| V3LHS_642311 | MAP3K13          | Kinase |
| V3LHS_642314 | TESK2            | Kinase |
| V3LHS_642315 | TESK2            | Kinase |
| V3LHS_642318 | TESK2            | Kinase |
| V3LHS_642319 | TESK2            | Kinase |
| V3LHS_642320 | TESK2            | Kinase |
| V3LHS_642421 | PIM2             | Kinase |
| V3LHS_642423 | PIM2             | Kinase |
| V3LHS_642424 | PIM2             | Kinase |
| V3LHS_642426 | PIM2             | Kinase |
| V3LHS_642427 | PIM2             | Kinase |
| V3LHS_642457 | Pak6             | Kinase |
| V3LHS_642458 | PAK6             | Kinase |
| V3LHS_642459 | PAK6             | Kinase |
| V3LHS_642460 | PAK6             | Kinase |
| V3LHS_642461 | PAK6             | Kinase |
| V3LHS_642462 | Map3k12, Pak6    | Kinase |
| V3LHS_642480 | PRKAG2           | Kinase |
| V3LHS_642481 | MET              | Kinase |
| V3LHS_642482 | MET              | Kinase |
| V3LHS_642486 | MET              | Kinase |
| V3LHS_642487 | MET              | Kinase |
| V3LHS_642496 | BC030499, SGK494 | Kinase |
| V3LHS_642497 | SGK494           | Kinase |
| V3LHS_642499 | SGK494           | Kinase |
| V3LHS_642500 | SGK494           | Kinase |
| V3LHS_642502 | SGK494           | Kinase |
| V3LHS_642591 | TTBK2            | Kinase |
| V3LHS_642592 | TTBK2            | Kinase |

|              |         |        |
|--------------|---------|--------|
| V3LHS_642595 | TTBK2   | Kinase |
| V3LHS_642596 | TTBK2   | Kinase |
| V3LHS_642598 | TTBK2   | Kinase |
| V3LHS_642666 | ADCK2   | Kinase |
| V3LHS_642670 | ADCK2   | Kinase |
| V3LHS_642671 | ADCK2   | Kinase |
| V3LHS_642672 | ADCK2   | Kinase |
| V3LHS_642726 | PIK3C2G | Kinase |
| V3LHS_642727 | PIK3C2G | Kinase |
| V3LHS_642728 | PIK3C2G | Kinase |
| V3LHS_642729 | PIK3C2G | Kinase |
| V3LHS_642733 | PIK3C2G | Kinase |
| V3LHS_642768 | SGK196  | Kinase |
| V3LHS_642769 | SGK196  | Kinase |
| V3LHS_642770 | SGK196  | Kinase |
| V3LHS_642771 | SGK196  | Kinase |
| V3LHS_642772 | SGK196  | Kinase |
| V3LHS_642774 | SGK196  | Kinase |
| V3LHS_642776 | SGK196  | Kinase |
| V3LHS_642777 | SGK196  | Kinase |
| V3LHS_642786 | Prpf4b  | Kinase |
| V3LHS_642787 | PRPF4B  | Kinase |
| V3LHS_642788 | PRPF4B  | Kinase |
| V3LHS_642789 | PRPF4B  | Kinase |
| V3LHS_642793 | PRPF4B  | Kinase |
| V3LHS_642812 | DUSP21  | Kinase |
| V3LHS_642813 | DUSP21  | Kinase |
| V3LHS_642816 | DUSP21  | Kinase |
| V3LHS_642817 | DUSP21  | Kinase |
| V3LHS_642819 | DUSP21  | Kinase |
| V3LHS_642820 | DUSP21  | Kinase |
| V3LHS_642821 | DUSP21  | Kinase |
| V3LHS_642822 | MAP3K14 | Kinase |
| V3LHS_642823 | MAP3K14 | Kinase |
| V3LHS_642825 | MAP3K14 | Kinase |
| V3LHS_642827 | MAP3K14 | Kinase |
| V3LHS_642843 | ALPK1   | Kinase |
| V3LHS_642846 | ALPK1   | Kinase |
| V3LHS_642847 | ALPK1   | Kinase |
| V3LHS_642850 | ALPK1   | Kinase |
| V3LHS_642880 | PASK    | Kinase |
| V3LHS_642881 | PASK    | Kinase |
| V3LHS_642882 | PASK    | Kinase |
| V3LHS_642883 | PASK    | Kinase |
| V3LHS_642884 | PASK    | Kinase |
| V3LHS_642886 | PASK    | Kinase |
| V3LHS_642890 | STK24   | Kinase |

|              |                  |        |
|--------------|------------------|--------|
| V3LHS_642891 | STK24            | Kinase |
| V3LHS_642893 | LOC501266, STK24 | Kinase |
| V3LHS_642957 | NTRK1            | Kinase |
| V3LHS_642958 | NTRK1            | Kinase |
| V3LHS_642959 | NTRK1            | Kinase |
| V3LHS_642961 | NTRK1            | Kinase |
| V3LHS_642963 | NTRK1            | Kinase |
| V3LHS_642964 | NTRK1            | Kinase |
| V3LHS_643018 | MAP2K4           | Kinase |
| V3LHS_643021 | MAP2K4, MAP2K4P1 | Kinase |
| V3LHS_643042 | ABL1, BCR        | Kinase |
| V3LHS_643043 | BCR              | Kinase |
| V3LHS_643044 | BCR, BCRP3       | Kinase |
| V3LHS_643047 | BCR              | Kinase |
| V3LHS_643048 | BCR              | Kinase |
| V3LHS_643049 | BCR              | Kinase |
| V3LHS_643074 | PKN1             | Kinase |
| V3LHS_643077 | PKN1             | Kinase |
| V3LHS_643080 | PKN1             | Kinase |
| V3LHS_643083 | CDC42BPG         | Kinase |
| V3LHS_643085 | CDC42BPG         | Kinase |
| V3LHS_643089 | CDC42BPG         | Kinase |
| V3LHS_643090 | CDC42BPG         | Kinase |
| V3LHS_643091 | CDC42BPG         | Kinase |
| V3LHS_643101 | LRRK1            | Kinase |
| V3LHS_643103 | LRRK1            | Kinase |
| V3LHS_643104 | LRRK1            | Kinase |
| V3LHS_643142 | Brd2             | Kinase |
| V3LHS_643176 | Clk3             | Kinase |
| V3LHS_643178 | Clk3             | Kinase |
| V3LHS_643250 | PIM3             | Kinase |
| V3LHS_643253 | PIM3             | Kinase |
| V3LHS_643256 | PIM3             | Kinase |
| V3LHS_643258 | PIM3             | Kinase |
| V3LHS_643295 | LIMK1            | Kinase |
| V3LHS_643297 | LIMK1            | Kinase |
| V3LHS_643300 | LIMK1            | Kinase |
| V3LHS_643301 | LIMK1            | Kinase |
| V3LHS_643312 | NEK6             | Kinase |
| V3LHS_643314 | NEK6             | Kinase |
| V3LHS_643316 | NEK6             | Kinase |
| V3LHS_643317 | NEK6             | Kinase |
| V3LHS_643318 | NEK6             | Kinase |
| V3LHS_643319 | NEK6             | Kinase |
| V3LHS_643321 | MAP2K3           | Kinase |
| V3LHS_643322 | MAP2K3           | Kinase |
| V3LHS_643538 | STRADA           | Kinase |

|              |            |        |
|--------------|------------|--------|
| V3LHS_643539 | STRADA     | Kinase |
| V3LHS_643540 | STRADA     | Kinase |
| V3LHS_643541 | STRADA     | Kinase |
| V3LHS_643542 | STRADA     | Kinase |
| V3LHS_643543 | STRADA     | Kinase |
| V3LHS_643618 | AAK1       | Kinase |
| V3LHS_643619 | AAK1       | Kinase |
| V3LHS_643624 | Aak1       | Kinase |
| V3LHS_643625 | AAK1       | Kinase |
| V3LHS_643626 | AAK1       | Kinase |
| V3LHS_643627 | AAK1       | Kinase |
| V3LHS_643663 | MYLK2      | Kinase |
| V3LHS_643664 | MYLK2      | Kinase |
| V3LHS_643666 | MYLK2      | Kinase |
| V3LHS_643668 | MYLK2      | Kinase |
| V3LHS_643719 | PLK3       | Kinase |
| V3LHS_643720 | Grm2, PLK3 | Kinase |
| V3LHS_643722 | PLK3       | Kinase |
| V3LHS_643723 | PLK3       | Kinase |
| V3LHS_643724 | PLK3       | Kinase |
| V3LHS_643725 | PLK3       | Kinase |
| V3LHS_643743 | TEX14      | Kinase |
| V3LHS_643745 | TEX14      | Kinase |
| V3LHS_643746 | TEX14      | Kinase |
| V3LHS_643747 | TEX14      | Kinase |
| V3LHS_643748 | TEX14      | Kinase |
| V3LHS_643749 | TEX14      | Kinase |
| V3LHS_643750 | TEX14      | Kinase |
| V3LHS_643801 | MST1R      | Kinase |
| V3LHS_643802 | MST1R      | Kinase |
| V3LHS_643804 | MST1R      | Kinase |
| V3LHS_643805 | MST1R      | Kinase |
| V3LHS_643806 | MST1R      | Kinase |
| V3LHS_643934 | PAK4       | Kinase |
| V3LHS_643937 | PAK4       | Kinase |
| V3LHS_643941 | DAPK1      | Kinase |
| V3LHS_643942 | DAPK1      | Kinase |
| V3LHS_643943 | DAPK1      | Kinase |
| V3LHS_643944 | DAPK1      | Kinase |
| V3LHS_643945 | DAPK1      | Kinase |
| V3LHS_643946 | DAPK1      | Kinase |
| V3LHS_643948 | DAPK1      | Kinase |
| V3LHS_643949 | MATK       | Kinase |
| V3LHS_643950 | MATK       | Kinase |
| V3LHS_643951 | MATK       | Kinase |
| V3LHS_643953 | MATK       | Kinase |
| V3LHS_643954 | MATK       | Kinase |

|              |                     |        |
|--------------|---------------------|--------|
| V3LHS_643955 | MATK                | Kinase |
| V3LHS_643973 | FES                 | Kinase |
| V3LHS_643974 | FES                 | Kinase |
| V3LHS_643975 | FES                 | Kinase |
| V3LHS_643978 | FES                 | Kinase |
| V3LHS_643979 | Fes                 | Kinase |
| V3LHS_643980 | FES                 | Kinase |
| V3LHS_643982 | TLK2                | Kinase |
| V3LHS_643983 | TLK2                | Kinase |
| V3LHS_643986 | TLK2                | Kinase |
| V3LHS_643988 | TLK2                | Kinase |
| V3LHS_643989 | MAST1               | Kinase |
| V3LHS_643994 | MAST1               | Kinase |
| V3LHS_644005 | SIK1                | Kinase |
| V3LHS_644008 | SIK1                | Kinase |
| V3LHS_644010 | SIK1                | Kinase |
| V3LHS_644021 | PRKG1               | Kinase |
| V3LHS_644024 | PRKG1               | Kinase |
| V3LHS_644025 | PRKG1               | Kinase |
| V3LHS_644026 | PRKG1               | Kinase |
| V3LHS_644102 | NEK10               | Kinase |
| V3LHS_644103 | NEK10               | Kinase |
| V3LHS_644105 | NEK10               | Kinase |
| V3LHS_644107 | NEK10               | Kinase |
| V3LHS_644110 | NEK10               | Kinase |
| V3LHS_644128 | PDGFRB              | Kinase |
| V3LHS_644131 | PDGFRB              | Kinase |
| V3LHS_644162 | LRRK2               | Kinase |
| V3LHS_644164 | LRRK2               | Kinase |
| V3LHS_644165 | LRRK2               | Kinase |
| V3LHS_644166 | LRRK2               | Kinase |
| V3LHS_644167 | LRRK2               | Kinase |
| V3LHS_644168 | LRRK2               | Kinase |
| V3LHS_644169 | LRRK2               | Kinase |
| V3LHS_644178 | CAMK4               | Kinase |
| V3LHS_644179 | CAMK4               | Kinase |
| V3LHS_644181 | CAMK4               | Kinase |
| V3LHS_644182 | Camk4               | Kinase |
| V3LHS_644183 | CAMK4               | Kinase |
| V3LHS_644215 | PTK7                | Kinase |
| V3LHS_644218 | PTK7                | Kinase |
| V3LHS_644219 | PTK7                | Kinase |
| V3LHS_644221 | PTK7                | Kinase |
| V3LHS_644232 | RPS6KA2             | Kinase |
| V3LHS_644236 | RPS6KA2             | Kinase |
| V3LHS_644238 | RPS6KA2             | Kinase |
| V3LHS_644286 | FPGT-TNNI3K, TNNI3K | Kinase |



|              |                     |        |
|--------------|---------------------|--------|
| V3LHS_644289 | FPGT-TNNI3K, TNNI3K | Kinase |
| V3LHS_644290 | FPGT-TNNI3K, TNNI3K | Kinase |
| V3LHS_644348 | STK16               | Kinase |
| V3LHS_644350 | STK16               | Kinase |
| V3LHS_644351 | STK16               | Kinase |
| V3LHS_644352 | STK16               | Kinase |
| V3LHS_644353 | STK16               | Kinase |
| V3LHS_644357 | CAMK1G              | Kinase |
| V3LHS_644358 | CAMK1G              | Kinase |
| V3LHS_644359 | Camk1g              | Kinase |
| V3LHS_644360 | CAMK1G              | Kinase |
| V3LHS_644362 | CAMK1G              | Kinase |
| V3LHS_644363 | Camk1g              | Kinase |
| V3LHS_644383 | PRKAG2              | Kinase |
| V3LHS_644385 | PRKAG2              | Kinase |
| V3LHS_644387 | PRKAG2              | Kinase |
| V3LHS_644388 | PRKAG2              | Kinase |
| V3LHS_644408 | Epha1               | Kinase |
| V3LHS_644410 | EPHA1               | Kinase |
| V3LHS_644412 | EPHA1               | Kinase |
| V3LHS_644413 | EPHA1               | Kinase |
| V3LHS_644415 | EPHA1               | Kinase |
| V3LHS_644462 | NEK2                | Kinase |
| V3LHS_644474 | SIK3                | Kinase |
| V3LHS_644475 | SIK3                | Kinase |
| V3LHS_644476 | TEC                 | Kinase |
| V3LHS_644477 | TEC                 | Kinase |
| V3LHS_644490 | FLT1                | Kinase |
| V3LHS_644493 | ATR                 | Kinase |
| V3LHS_644505 | Ephb3               | Kinase |
| V3LHS_644516 | ADCK4               | Kinase |
| V3LHS_644517 | ADCK4               | Kinase |
| V3LHS_644571 | SRPK3               | Kinase |
| V3LHS_644609 | TSSK6               | Kinase |
| V3LHS_644618 | NTRK3               | Kinase |
| V3LHS_644619 | NTRK3               | Kinase |
| V3LHS_644622 | FGFR1               | Kinase |
| V3LHS_644640 | CAMK2A              | Kinase |
| V3LHS_644641 | CAMK2A              | Kinase |
| V3LHS_644649 | STK36               | Kinase |
| V3LHS_644655 | TRIB3               | Kinase |
| V3LHS_644658 | CDK16               | Kinase |
| V3LHS_644659 | CDK16               | Kinase |
| V3LHS_644663 | NRK                 | Kinase |
| V3LHS_644676 | MAP3K11             | Kinase |
| V3LHS_644688 | GRK5                | Kinase |
| V3LHS_644692 | PRKCZ               | Kinase |

|              |         |        |
|--------------|---------|--------|
| V3LHS_644694 | MTOR    | Kinase |
| V3LHS_644695 | MTOR    | Kinase |
| V3LHS_644702 | PKMYT1  | Kinase |
| V3LHS_644724 | RIPK2   | Kinase |
| V3LHS_644760 | ERBB2   | Kinase |
| V3LHS_644761 | ERBB2   | Kinase |
| V3LHS_644765 | Clk2    | Kinase |
| V3LHS_644767 | RPS6KA4 | Kinase |
| V3LHS_644773 | ULK1    | Kinase |
| V3LHS_644813 | BRD2    | Kinase |
| V3LHS_644824 | TAB1    | Kinase |
| V3LHS_644825 | TAB1    | Kinase |
| V3LHS_644836 | TBCK    | Kinase |
| V3LHS_644862 | CHEK1   | Kinase |
| V3LHS_644870 | TNK2    | Kinase |
| V3LHS_644871 | TNK2    | Kinase |
| V3LHS_644878 | MAPK4   | Kinase |
| V3LHS_644884 | EPHA2   | Kinase |
| V3LHS_644904 | LTK     | Kinase |
| V3LHS_644905 | LTK     | Kinase |
| V3LHS_644912 | FLT4    | Kinase |
| V3LHS_644913 | FLT4    | Kinase |
| V3LHS_644922 | MST4    | Kinase |
| V3LHS_644923 | MST4    | Kinase |
| V3LHS_644930 | MAPK12  | Kinase |
| V3LHS_644940 | NUP62   | Kinase |
| V3LHS_644965 | BRD4    | Kinase |
| V3LHS_644966 | Brd4    | Kinase |
| V3LHS_644989 | MAP3K6  | Kinase |
| V3LHS_644990 | MAP3K6  | Kinase |
| V3LHS_644999 | STYK1   | Kinase |
| V3LHS_645000 | STYK1   | Kinase |
| V3LHS_645006 | CDK1    | Kinase |
| V3LHS_645009 | EPHB4   | Kinase |
| V3LHS_645010 | EPHB4   | Kinase |
| V3LHS_645035 | CDK6    | Kinase |
| V3LHS_645036 | CDK6    | Kinase |
| V3LHS_645038 | MAP3K2  | Kinase |
| V3LHS_645060 | ADCK1   | Kinase |
| V3LHS_645061 | ADCK1   | Kinase |
| V3LHS_645068 | HSPB8   | Kinase |
| V3LHS_645090 | SRPK2   | Kinase |
| V3LHS_645091 | SRPK2   | Kinase |
| V3LHS_645141 | MAP2K7  | Kinase |
| V3LHS_645142 | MAP2K7  | Kinase |
| V3LHS_645147 | TLK1    | Kinase |
| V3LHS_645170 | CDK2    | Kinase |

|              |                 |        |
|--------------|-----------------|--------|
| V3LHS_645178 | PRKCD           | Kinase |
| V3LHS_645208 | BRSK2           | Kinase |
| V3LHS_645213 | CHEK2           | Kinase |
| V3LHS_645214 | CHEK2           | Kinase |
| V3LHS_645241 | MAPK11          | Kinase |
| V3LHS_645242 | MAPK11          | Kinase |
| V3LHS_645251 | RIPK1           | Kinase |
| V3LHS_645268 | STK40           | Kinase |
| V3LHS_645269 | STK40           | Kinase |
| V3LHS_645286 | ALPK1           | Kinase |
| V3LHS_645299 | RIPK3           | Kinase |
| V3LHS_645311 | CLK3            | Kinase |
| V3LHS_645312 | CLK3            | Kinase |
| V3LHS_645331 | MYO3A           | Kinase |
| V3LHS_645335 | AURKA, AURKAPS1 | Kinase |
| V3LHS_645341 | RPS6KA5         | Kinase |
| V3LHS_645353 | RNASEL          | Kinase |
| V3LHS_645364 | RPS6KL1         | Kinase |
| V3LHS_645365 | RPS6KL1         | Kinase |
| V3LHS_645371 | SLK             | Kinase |
| V3LHS_645374 | EXOSC10         | Kinase |
| V3LHS_645375 | EXOSC10         | Kinase |
| V3LHS_645380 | EIF2AK1         | Kinase |
| V3LHS_645381 | EIF2AK1         | Kinase |
| V3LHS_645384 | PHKG2           | Kinase |
| V3LHS_645385 | PHKG2           | Kinase |
| V3LHS_645396 | CDK12           | Kinase |
| V3LHS_645397 | CDK12           | Kinase |
| V3LHS_645400 | GUCY2D          | Kinase |
| V3LHS_645401 | GUCY2D          | Kinase |
| V3LHS_645410 | CSNK1D          | Kinase |
| V3LHS_645411 | CSNK1D          | Kinase |
| V3LHS_645420 | STK11           | Kinase |
| V3LHS_645421 | STK11           | Kinase |
| V3LHS_645438 | TGFBR2          | Kinase |
| V3LHS_645448 | RPS6KB2         | Kinase |
| V3LHS_645449 | RPS6KB2         | Kinase |
| V3LHS_645451 | BTK             | Kinase |
| V3LHS_645454 | EIF2AK3         | Kinase |
| V3LHS_645455 | EIF2AK3         | Kinase |
| V3LHS_645467 | SGK2            | Kinase |
| V3LHS_645470 | STK24           | Kinase |
| V3LHS_645471 | STK24           | Kinase |
| V3LHS_645496 | CAMKK2          | Kinase |
| V3LHS_645497 | CAMKK2          | Kinase |
| V3LHS_645513 | PHKG1           | Kinase |
| V3LHS_645552 | IKBKE           | Kinase |

|              |                     |        |
|--------------|---------------------|--------|
| V3LHS_645554 | FASTK               | Kinase |
| V3LHS_645562 | MAPK3               | Kinase |
| V3LHS_645572 | LOC407835, MAP2K2   | Kinase |
| V3LHS_645575 | CSNK2A1             | Kinase |
| V3LHS_645576 | CSNK2A1             | Kinase |
| V3LHS_645587 | SRC                 | Kinase |
| V3LHS_645588 | SRC                 | Kinase |
| V3LHS_645630 | AKT1                | Kinase |
| V3LHS_645672 | PRKCE               | Kinase |
| V3LHS_645673 | PRKCE               | Kinase |
| V3LHS_645688 | PRKD2               | Kinase |
| V3LHS_645689 | PRKD2               | Kinase |
| V3LHS_645693 | DYRK1B              | Kinase |
| V3LHS_645701 | PRKACA              | Kinase |
| V3LHS_645735 | FPGT-TNNI3K, TNNI3K | Kinase |
| V3LHS_645768 | PBK                 | Kinase |
| V3LHS_645769 | PBK                 | Kinase |
| V3LHS_645773 | MAPK7, MFAP4        | Kinase |
| V3LHS_645782 | SCYL1               | Kinase |
| V3LHS_645816 | MAP2K3              | Kinase |
| V3LHS_645817 | MAP2K3              | Kinase |
| V3LHS_645818 | PTK6                | Kinase |
| V3LHS_645819 | PTK6                | Kinase |
| V3LHS_645830 | GRK6                | Kinase |
| V3LHS_645831 | GRK6                | Kinase |
| V3LHS_645851 | LCK                 | Kinase |
| V3LHS_645859 | IRAK1               | Kinase |
| V3LHS_645874 | DMPK                | Kinase |
| V3LHS_645878 | STRADB              | Kinase |
| V3LHS_645885 | CDK10               | Kinase |
| V3LHS_645886 | PIK3C3              | Kinase |
| V3LHS_645938 | SRPK1               | Kinase |
| V3LHS_645940 | TRIB2               | Kinase |
| V3LHS_645944 | PRKG1               | Kinase |
| V3LHS_645945 | PRKG1               | Kinase |
| V3LHS_645950 | CDK4                | Kinase |
| V3LHS_645951 | CDK4                | Kinase |
| V3LHS_645957 | STK32C              | Kinase |
| V3LHS_646009 | TLK2                | Kinase |
| V3LHS_646010 | Tlk2                | Kinase |
| V3LHS_646037 | FGFR4               | Kinase |
| V3LHS_646046 | VRK3                | Kinase |
| V3LHS_646047 | VRK3                | Kinase |
| V3LHS_646050 | PIK3CD              | Kinase |
| V3LHS_646051 | PIK3CD              | Kinase |
| V3LHS_646056 | ARAF                | Kinase |
| V3LHS_646057 | ARAF                | Kinase |

|              |                    |        |
|--------------|--------------------|--------|
| V3LHS_646058 | TNK1               | Kinase |
| V3LHS_646087 | PIM2               | Kinase |
| V3LHS_646090 | PAK6               | Kinase |
| V3LHS_646091 | PAK6               | Kinase |
| V3LHS_646098 | MET                | Kinase |
| V3LHS_646118 | TTBK2              | Kinase |
| V3LHS_646130 | FGR                | Kinase |
| V3LHS_646160 | PRPF4B             | Kinase |
| V3LHS_646161 | PRPF4B             | Kinase |
| V3LHS_646164 | MAP3K14            | Kinase |
| V3LHS_646165 | MAP3K14            | Kinase |
| V3LHS_646172 | PASK               | Kinase |
| V3LHS_646204 | MAP2K4, MAP2K4P1   | Kinase |
| V3LHS_646205 | Map2k4             | Kinase |
| V3LHS_646210 | BCR                | Kinase |
| V3LHS_646218 | PKN1               | Kinase |
| V3LHS_646223 | LRRK1              | Kinase |
| V3LHS_646261 | LIMK1              | Kinase |
| V3LHS_646262 | NEK6               | Kinase |
| V3LHS_646314 | STRADA             | Kinase |
| V3LHS_646315 | STRADA             | Kinase |
| V3LHS_646340 | MYLK2              | Kinase |
| V3LHS_646358 | PLK3               | Kinase |
| V3LHS_646365 | TEX14              | Kinase |
| V3LHS_646366 | TEX14              | Kinase |
| V3LHS_646375 | MST1R              | Kinase |
| V3LHS_646376 | MST1R              | Kinase |
| V3LHS_646381 | MAP4K1             | Kinase |
| V3LHS_646396 | PAK4               | Kinase |
| V3LHS_646398 | DAPK1              | Kinase |
| V3LHS_646399 | MATK               | Kinase |
| V3LHS_646406 | FES                | Kinase |
| V3LHS_646408 | MAST1              | Kinase |
| V3LHS_646412 | SIK1               | Kinase |
| V3LHS_646435 | PDGFRB             | Kinase |
| V3LHS_646440 | CAMK4              | Kinase |
| V3LHS_646441 | CAMK4              | Kinase |
| V3LHS_646448 | PTK7               | Kinase |
| V3LHS_646449 | PTK7               | Kinase |
| V3LHS_646452 | CAMK1D, RGD1560691 | Kinase |
| V3LHS_646453 | CAMK1D             | Kinase |
| V3LHS_646454 | RPS6KA2            | Kinase |
| V3LHS_646477 | STK16              | Kinase |
| V3LHS_646478 | STK16              | Kinase |
| V3LHS_646489 | EPHA1              | Kinase |
| V3LHS_646516 | SIK3               | Kinase |
| V3LHS_646517 | ACVR1C             | Kinase |

V3LHS\_646518 AKT2

Kinase

**Table S2.** Summary of screens

| Experiment             | Enrichment/Depletion Magnitude | Average Independent Integrations per shRNA | Fold Representation in PCR Amplification | Log <sub>2</sub> Ratio of Enrichment/Depletion |
|------------------------|--------------------------------|--------------------------------------------|------------------------------------------|------------------------------------------------|
| Screen 100_2x          | 2                              | 100                                        | 100                                      | 1                                              |
| Screen 100_4x          | 4                              | 100                                        | 100                                      | 2                                              |
| Screen 500_1.5xPCR_100 | 1.5                            | 500                                        | 100                                      | 0.585                                          |
| Screen 500_2xPCR_100   | 2                              | 500                                        | 100                                      | 1                                              |
| Screen 500_1.5x        | 1.5                            | 500                                        | 500                                      | 0.585                                          |
| Screen 500_2x          | 2                              | 500                                        | 500                                      | 1                                              |

**Table S3.** Summary of actual screen data analysis with 3 replicates**A. shRNA counts**

| Experiment             | Total Present <sup>1</sup> |          | True Positives |          | False Positives |          | True Negatives |          | False Negatives |          |
|------------------------|----------------------------|----------|----------------|----------|-----------------|----------|----------------|----------|-----------------|----------|
|                        | Average                    | $\sigma$ | Average        | $\sigma$ | Average         | $\sigma$ | Average        | $\sigma$ | Average         | $\sigma$ |
| Screen 100_2x          | 5598                       | 1.10     | 259            | 4.13     | 49              | 0.51     | 4610           | 0.51     | 680             | 4.53     |
| Screen 100_4x          | 5595                       | 0.55     | 714            | 5.00     | 61              | 0.53     | 4596           | 0.53     | 224             | 5.20     |
| Screen 500_1.5xPCR_100 | 5600                       | 0.79     | 31             | 3.57     | 10              | 1.10     | 4650           | 1.10     | 909             | 3.83     |
| Screen 500_2xPCR_100   | 5603                       | 0.37     | 327            | 6.54     | 39              | 1.06     | 4624           | 1.06     | 613             | 6.52     |
| Screen 500_1.5x        | 5604                       | 0.18     | 549            | 8.59     | 49              | 1.13     | 4614           | 1.13     | 392             | 8.66     |
| Screen 500_2x          | 5603                       | 0.00     | 877            | 3.71     | 65              | 0.63     | 4598           | 0.63     | 63              | 3.71     |

<sup>1</sup>Number of shRNA with > 50 perfect alignments in NGS data

**B. Percentages**

| Experiment             | Power (%) |          | Specificity (%) |          | False Positive Rate (%) |          | False Negative Rate (%) |          |
|------------------------|-----------|----------|-----------------|----------|-------------------------|----------|-------------------------|----------|
|                        | Average   | $\sigma$ | Average         | $\sigma$ | Average                 | $\sigma$ | Average                 | $\sigma$ |
| Screen 100_2x          | 27.60     | 0.45     | 98.95           | 0.01     | 1.05                    | 0.01     | 72.40                   | 0.45     |
| Screen 100_4x          | 76.10     | 0.55     | 98.68           | 0.01     | 1.32                    | 0.01     | 23.90                   | 0.55     |
| Screen 500_1.5xPCR_100 | 3.34      | 0.38     | 99.78           | 0.02     | 0.22                    | 0.02     | 96.66                   | 0.38     |
| Screen 500_2xPCR_100   | 34.79     | 0.69     | 99.16           | 0.02     | 0.84                    | 0.02     | 65.21                   | 0.69     |
| Screen 500_1.5x        | 58.35     | 0.92     | 98.95           | 0.02     | 1.05                    | 0.02     | 41.65                   | 0.92     |
| Screen 500_2x          | 93.26     | 0.39     | 98.60           | 0.01     | 1.40                    | 0.01     | 6.74                    | 0.39     |



**Table S4.** Screen statistics for all, enriched, and depleted hits

| Replicates | Experiment             | Total Present |          | True Positives |          | False Positives |          | True Negatives |          | False Negatives |          | Power (%) |          | Specificity (%) |          | False Positive Rate (%) |          | False Negative Rate (%) |          | Enriched True Positives |          | Enriched False Negatives |          | Enriched False Negative Rate (%) |          |
|------------|------------------------|---------------|----------|----------------|----------|-----------------|----------|----------------|----------|-----------------|----------|-----------|----------|-----------------|----------|-------------------------|----------|-------------------------|----------|-------------------------|----------|--------------------------|----------|----------------------------------|----------|
|            |                        | Average       | $\sigma$ | Average        | $\sigma$ | Average         | $\sigma$ | Average        | $\sigma$ | Average         | $\sigma$ | Average   | $\sigma$ | Average         | $\sigma$ | Average                 | $\sigma$ | Average                 | $\sigma$ | Average                 | $\sigma$ | Average                  | $\sigma$ | Average                          | $\sigma$ |
| 2          | Screen 100_2x          | 5591          | 1.19     | 121            | 3.16     | 36.40           | 1.26     | 4619           | 1.26     | 815             | 3.71     | 12.93     | 0.34     | 99.22           | 0.03     | 0.78                    | 0.03     | 87.07                   | 0.34     | 30                      | 1.54     | 384                      | 2.66     | 92.66                            | 0.37     |
| 2          | Screen 100_4x          | 5590          | 0.37     | 613            | 5.53     | 69.93           | 1.53     | 4584           | 1.53     | 323             | 5.61     | 65.49     | 0.60     | 98.50           | 0.03     | 1.50                    | 0.03     | 34.51                   | 0.60     | 255                     | 3.69     | 118                      | 3.04     | 31.67                            | 0.74     |
| 2          | Screen 500_1.5xPCR_100 | 5598          | 0.79     | 9              | 1.55     | 17.73           | 1.59     | 4641           | 1.59     | 930             | 1.56     | 0.94      | 0.17     | 99.62           | 0.03     | 0.38                    | 0.03     | 99.06                   | 0.17     | 4                       | 0.76     | 470                      | 1.08     | 99.11                            | 0.16     |
| 2          | Screen 500_2xPCR_100   | 5600          | 0.37     | 317            | 4.36     | 54.83           | 0.97     | 4606           | 0.97     | 622             | 4.37     | 33.73     | 0.46     | 98.82           | 0.02     | 1.18                    | 0.02     | 66.27                   | 0.46     | 94                      | 2.90     | 252                      | 3.02     | 72.92                            | 0.67     |
| 2          | Screen 500_1.5x        | 5603          | 0.25     | 273            | 7.81     | 32.27           | 1.41     | 4630           | 1.41     | 668             | 7.80     | 28.96     | 0.83     | 99.31           | 0.03     | 0.69                    | 0.03     | 71.04                   | 0.83     | 95                      | 4.13     | 297                      | 5.49     | 75.82                            | 0.95     |
| 2          | Screen 500_2x          | 5602          | 0.00     | 784            | 5.64     | 59.17           | 0.97     | 4603           | 0.97     | 156             | 5.64     | 83.45     | 0.60     | 98.73           | 0.02     | 1.27                    | 0.02     | 16.55                   | 0.60     | 356                     | 4.22     | 47                       | 3.39     | 11.62                            | 0.76     |
| 3          | Screen 100_2x          | 5598          | 1.10     | 259            | 4.13     | 48.73           | 0.51     | 4610           | 0.51     | 680             | 4.53     | 27.60     | 0.45     | 98.95           | 0.01     | 1.05                    | 0.01     | 72.40                   | 0.45     | 84                      | 3.09     | 300                      | 2.35     | 78.17                            | 0.68     |
| 3          | Screen 100_4x          | 5595          | 0.55     | 714            | 5.00     | 61.30           | 0.53     | 4596           | 0.53     | 224             | 5.20     | 76.10     | 0.55     | 98.68           | 0.01     | 1.32                    | 0.01     | 23.90                   | 0.55     | 313                     | 3.90     | 75                       | 2.26     | 19.26                            | 0.55     |
| 3          | Screen 500_1.5xPCR_100 | 5600          | 0.79     | 31             | 3.57     | 10.30           | 1.10     | 4650           | 1.10     | 909             | 3.83     | 3.34      | 0.38     | 99.78           | 0.02     | 0.22                    | 0.02     | 96.66                   | 0.38     | 7                       | 1.28     | 451                      | 2.67     | 98.38                            | 0.28     |
| 3          | Screen 500_2xPCR_100   | 5603          | 0.37     | 327            | 6.54     | 39.27           | 1.06     | 4624           | 1.06     | 613             | 6.52     | 34.79     | 0.69     | 99.16           | 0.02     | 0.84                    | 0.02     | 65.21                   | 0.69     | 93                      | 3.97     | 241                      | 3.43     | 72.21                            | 1.04     |
| 3          | Screen 500_1.5x        | 5604          | 0.18     | 549            | 8.59     | 48.83           | 1.13     | 4614           | 1.13     | 392             | 8.66     | 58.35     | 0.92     | 98.95           | 0.02     | 1.05                    | 0.02     | 41.65                   | 0.92     | 223                     | 5.57     | 149                      | 4.50     | 40.04                            | 1.14     |
| 3          | Screen 500_2x          | 5603          | 0.00     | 877            | 3.71     | 65.07           | 0.63     | 4598           | 0.63     | 63              | 3.71     | 93.26     | 0.39     | 98.60           | 0.01     | 1.40                    | 0.01     | 6.74                    | 0.39     | 417                     | 2.25     | 15                       | 2.14     | 3.50                             | 0.49     |

| Replicates | Experiment             | Enriched Power (%) |          | Depleted True |          | Depleted False |          | Depleted False |          | Depleted Power (%) |          |
|------------|------------------------|--------------------|----------|---------------|----------|----------------|----------|----------------|----------|--------------------|----------|
|            |                        | Average            | $\sigma$ | Average       | $\sigma$ | Average        | $\sigma$ | Average        | $\sigma$ | Average            | $\sigma$ |
| 2          | Screen 100_2x          | 7.34               | 0.37     | 91            | 2.20     | 431            | 1.88     | 82.62          | 0.37     | 17.38              | 0.37     |
| 2          | Screen 100_4x          | 68.33              | 0.74     | 357           | 2.92     | 205            | 3.69     | 36.40          | 0.52     | 63.60              | 0.52     |
| 2          | Screen 500_1.5xPCR_100 | 0.89               | 0.16     | 5             | 1.08     | 460            | 0.84     | 99.01          | 0.23     | 0.99               | 0.23     |
| 2          | Screen 500_2xPCR_100   | 27.08              | 0.67     | 223           | 3.02     | 370            | 3.00     | 62.40          | 0.38     | 37.60              | 0.38     |
| 2          | Screen 500_1.5x        | 24.18              | 0.95     | 178           | 5.49     | 371            | 4.11     | 67.63          | 0.79     | 32.37              | 0.79     |
| 2          | Screen 500_2x          | 88.38              | 0.76     | 428           | 3.39     | 109            | 4.22     | 20.25          | 0.65     | 79.75              | 0.65     |
| 3          | Screen 100_2x          | 21.83              | 0.68     | 175           | 2.02     | 380            | 3.33     | 68.41          | 0.35     | 31.59              | 0.35     |
| 3          | Screen 100_4x          | 80.74              | 0.55     | 401           | 2.29     | 150            | 4.14     | 27.17          | 0.59     | 72.83              | 0.59     |
| 3          | Screen 500_1.5xPCR_100 | 1.62               | 0.28     | 24            | 2.67     | 458            | 1.65     | 95.03          | 0.54     | 4.97               | 0.54     |
| 3          | Screen 500_2xPCR_100   | 27.79              | 1.04     | 234           | 3.43     | 372            | 3.96     | 61.37          | 0.53     | 38.63              | 0.53     |
| 3          | Screen 500_1.5x        | 59.96              | 1.14     | 326           | 4.50     | 243            | 5.63     | 42.70          | 0.78     | 57.30              | 0.78     |
| 3          | Screen 500_2x          | 96.50              | 0.49     | 460           | 2.14     | 48             | 2.25     | 9.49           | 0.42     | 90.51              | 0.42     |
